# Supplementary material for: Passerini/Tsuji–Trost strategies towards achieving lactams and cyclopentane derivatives
Source: Royal Society of Chemistry journal article supplement (doi:10.1039/c5cc00584a), 2015-01-01

## Passerini/Tsuji-Trost strategies towards lactams and cyclopentane derivatives.

Marie Cordier, Aurélie Dos Santos, Laurent El Kaïm,\* Noisette Narboni.

### Experimental part:

NMR spectra were recorded on a 400 MHz spectrometer, using deuterated solvent as reference and/or internal deuterium lock. Two-dimensional NMR spectroscopy [ $^1\text{H}$ - $^1\text{H}$  COSY spectra,  $^1\text{H}$ - $^{13}\text{C}$  COSY spectra (HSQC) and long-range  $^1\text{H}$ - $^{13}\text{C}$  COSY spectra (HMBC)], were carried out to determine the correlation between  $^1\text{H}$  and  $^{13}\text{C}$ . The chemical shifts for all NMR spectra are expressed in parts per million to high frequency of TMS reference. Coupling constants ( $J$ ) are quoted in Hz and are recorded to the nearest 0.1 Hz.

The IR spectra were obtained using ATR accessories. High-resolution (HR) mass spectra were performed on a GC/MS system spectrometer. TLC was carried out using precoated plates of silica gel 60F<sub>254</sub>.

### General procedure A for Passerini reactions :

A mixture of aldehyde (1.0 equiv), acetic acid (1.0 equiv) and isocyanide (1.0 equiv) was stirred at room temperature for 2 days. The crude was purified by flash chromatography on silica gel.

### General procedure Abis for Passerini reactions :

A mixture of aldehyde (1.0 equiv), acetic acid (1.0 equiv) and isocyanide (1.0 equiv) was stirred at 40°C for 2 days. The crude was purified by flash chromatography on silica gel.

### General procedure B for Tsuji-Trost reactions:

To a 0.25 M solution of Passerini adduct **1** (1.0 equiv.) in toluene were added dimethyl malonate (1.0 equiv),  $\text{Cs}_2\text{CO}_3$  (1.0 equiv) and  $\text{Pd}(\text{PPh}_3)_4$  (5 mol %). The resulting mixture was stirred at 50°C during 30 minutes. The solvent was removed afterwards under reduced pressure and the crude was purified by flash chromatography on silica gel.

### General procedure C for cyclisation reactions:

To a 0.2 M solution of Tsuji-Trost adduct **2** (1.0 eq) in methanol was added  $\text{Cs}_2\text{CO}_3$  (0.5eq). The resulting mixture was heated under microwave at 100°C during 30 minutes. The solvent was removed afterwards under reduced pressure. The crude was diluted with dichloromethane and the organic phase was washed with water acidified by citric acid. After drying the organic phase with  $\text{MgSO}_4$ , the solvent was removed under reduced pressure. The crude was purified by flash chromatography on silica gel.

### General procedure D for Tsuji-Trost reaction followed by cyclisation for bis-nucleophiles :

To a 0.25 M solution of Passerini adduct **1** (1.0 eq) in toluene were added the bis-nucleophile **4** (1.0 eq),  $\text{Cs}_2\text{CO}_3$  (1.2 eq) and  $\text{Pd}(\text{PPh}_3)_4$  (5 mol%). The resulting mixture was stirred at 50°C during 30 minutes. The solvent was removed afterwards under reduced pressure and the crude was purified by flash chromatography on silica gel.

## Passerini products :

### Acetic acid 1-cyclohexylcarbamoyl-3-phenyl-allyl ester (1a)

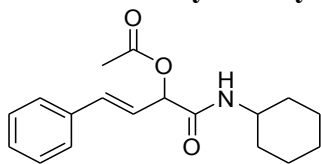

Compound **1a** was prepared according to general procedure A. Purification by flash chromatography with a gradient Et<sub>2</sub>O/EP (30/70 to 100/0) gave the desired product (567 mg, 94%) as a white solid. **CCM** Rf (80/20 Et<sub>2</sub>O/EP) = 0.36 ; **Mp** 129 – 130°C ; **<sup>1</sup>H-NMR** ( $\delta$ , ppm) (CDCl<sub>3</sub>, 400 MHz) 7.38 (d, J=7.6Hz, 2H), 7.31 (m, 3H), 6.72 (d, J=16.0 Hz, 1H), 6.26 (dd, J=16.0, 6.8Hz, 1H), 5.92 (d, J=7.6Hz, 1H), 5.70 (d, J=6.8Hz, 1H), 3.80 (m, 1H), 2.20 (s, 3H), 1.91 (m, 2H), 1.70 (m, 2H), 1.61 (m, 2H), 1.35 (m, 2H), 1.18 (m, 2H) ; **<sup>13</sup>C-NMR** ( $\delta$ , ppm) (CDCl<sub>3</sub>, 100.6 MHz) 169.2 (Cq), 167.1 (Cq), 135.7 (CH), 134.7 (Cq), 128.6 (2CH), 128.4 (CH), 126.9 (2CH), 122.7 (CH), 74.5 (CH), 48.3 (CH), 33.0 (2CH<sub>2</sub>), 25.5 (CH<sub>2</sub>), 24.81(2CH<sub>2</sub>), 21.12 (Me) ; **IR** ( $\nu$ , cm<sup>-1</sup>) 3285, 2930, 2854, 1742, 1658, 1541, 1449, 1370, 1230, 1031 ; **HRMS** (EI) Calcd. for C<sub>18</sub>H<sub>23</sub>NO<sub>3</sub> : 301.1678 found : 301.1681

### Benzoic acid 1-cyclohexylcarbamoyl-3-phenyl-allyl ester (1b)

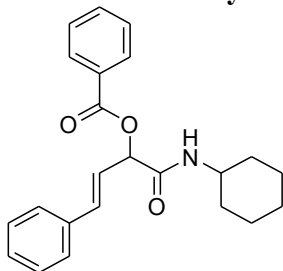

Compound **1b** was prepared according to general procedure Abis. Purification by flash chromatography with a gradient Et<sub>2</sub>O/EP (30/70 to 100/0) gave the desired product (880 mg, 81%) as a white solid. **CCM** Rf (80/20 Et<sub>2</sub>O/EP) = 0.75 ; **Mp** 180°C ; **<sup>1</sup>H-NMR** ( $\delta$ , ppm) (CDCl<sub>3</sub>, 400 MHz) 8.12 (d, J= 7.6 Hz, 2H), 7.63 (t, J=7.2Hz, 1H), 7.50 (t, J=6.4Hz, 2H), 7.41 (d, J=8.0Hz, 2H), 7.32 (t, J=7.2Hz, 2H), 7.27 (d, J=7.6Hz, 1H), 6.81 (d, J=15.6Hz, 1H), 6.42 (dd, J=15.6, 6.8Hz, 1H), 6.02 (m, 1H), 5.99 (d, J=6.8Hz, 1H), 3.83 (m, 1H), 1.94 (m, 2H), 1.69 (m, 2H), 1.59 (m, 2H), 1.36 (m, 2H), 1.18 (m, 2H) ; **<sup>13</sup>C-NMR** ( $\delta$ , ppm) (CDCl<sub>3</sub>, 100.6 MHz) 167.2 (Cq), 165.0 (Cq), 135.7 (Cq), 134.6 (CH), 133.7 (CH), 129.8 (2CH), 129.3 (Cq), 128.7 (2CH), 128.6 (2CH), 128.4 (CH), 126.9 (2CH), 122.7 (CH), 74.9 (CH), 48.3 (CH), 33.0 (2CH<sub>2</sub>), 25.5 (CH<sub>2</sub>), 24.8 (CH<sub>2</sub>), 24.7 (CH<sub>2</sub>) ; **IR** ( $\nu$ , cm<sup>-1</sup>) 3299, 2930, 2854, 1722, 1660, 1541, 1450, 1264, 1109, 1069, 1026 **HRMS** (EI) Calcd. for C<sub>23</sub>H<sub>25</sub>NO<sub>3</sub> : 363.1834 found : 363.1834

### Acetic acid 1-tert-butylcarbamoyl-3-phenyl-allyl ester (1c)

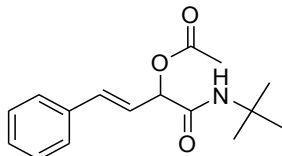

Compound **1c** was prepared according to general procedure A. Purification by flash chromatography with a gradient Et<sub>2</sub>O/EP (10/90 to 30/70) gave the desired product (606 mg, 73%) as a white solid. **CCM** Rf (80/20 Et<sub>2</sub>O/EP) = 0.55 ; **Mp** 116 – 118°C ; **<sup>1</sup>H-NMR** ( $\delta$ , ppm) (CDCl<sub>3</sub>, 400 MHz) 7.44 (d, J=7.6Hz, 2H), 7.37 (m, 3H), 6.76 (d, J=16.0Hz, 1H), 6.31 (dd, J=16.0, 6.8Hz, 1H), 5.90 (br s, 1H), 5.67 (d, J=6.8Hz, 1H), 2.24 (s, 3H), 1.42 (s, 9H) ; **<sup>13</sup>C-NMR** ( $\delta$ , ppm) (CDCl<sub>3</sub>,

100.6 MHz) 169.2 (Cq), 167.1 (Cq), 135.7 (Cq), 134.7 (CH), 128.6 (2CH), 128.4 (CH), 126.8 (2CH), 122.8 (CH), 74.7 (CH), 51.5 (Cq), 28.7 (3CH<sub>3</sub>), 21.1 (CH<sub>3</sub>); **IR** ( $\nu$ , cm<sup>-1</sup>) 3306, 2968, 1741, 1665, 1541, 1451, 1366, 1227, 1033; **HRMS** (EI) Calcd. for C<sub>16</sub>H<sub>21</sub>NO<sub>3</sub>: 275.1521 found: 275.1517

#### Acetic acid 1-(4-chloro-benzylcarbamoyl)-3-phenyl-allyl ester (**1d**)

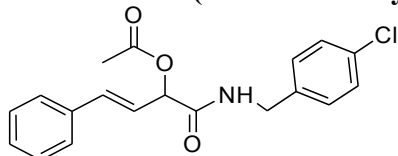

Compound **1d** was prepared according to general procedure A. Purification by flash chromatography with a gradient Et<sub>2</sub>O/EP (30/70 to 100/0) gave the desired product (621 mg, 90%) as a cream solid. **CCM** R<sub>f</sub> (80/20 Et<sub>2</sub>O/EP) = 0.27; **Mp** 103-104°C; **<sup>1</sup>H-NMR** ( $\delta$ , ppm) (CDCl<sub>3</sub>, 400 MHz) 7.37 (d, *J*=7.6Hz, 2H), 7.30 (m, 5H), 7.21 (d, *J*=8.0Hz, 2H), 6.73 (d, *J*=15.6Hz, 1H), 6.42 (br s, 1H), 6.27 (dd, *J*=15.6, 6.8Hz, 1H), 5.75 (d, *J*=7.2Hz, 1H), 4.43 (m, 2H), 2.19 (s, 3H); **<sup>13</sup>C-NMR** ( $\delta$ , ppm) (CDCl<sub>3</sub>, 100.6 MHz) 169.3 (Cq), 168.2 (Cq), 136.2 (Cq), 135.4 (Cq), 135.1 (CH), 133.5 (Cq), 129.0 (2CH), 128.9 (2CH), 128.6 (CH), 128.5 (2CH), 126.8 (2CH), 122.1 (CH), 74.5 (CH), 42.6 (CH<sub>2</sub>), 21.0 (CH<sub>3</sub>); **IR** ( $\nu$ , cm<sup>-1</sup>) 3288, 3062, 2927, 1740, 1661, 1538, 1491, 1370, 1228, 1090, 1015; **HRMS** (EI) Calcd. for C<sub>19</sub>H<sub>18</sub>ClNO<sub>3</sub>: 343.0975 found: 343.0979

#### (*E*)-1-((4-methoxybenzyl)amino)-1-oxo-4-phenylbut-3-en-2-yl acetate (**1e**)

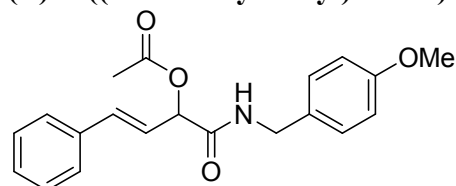

Compound **1e** was prepared according to the general procedure A. Purification by flash chromatography with a gradient PE/AcOEt (from 70/30 to 50/50) as eluant gave the desired product (881 mg, 87%) as a yellow solid. **Mp** 115 – 116°C; **<sup>1</sup>H-NMR** ( $\delta$ , ppm) (CDCl<sub>3</sub>, 400 MHz) 7.39-7.37 (m, 2H), 7.34-7.27 (m, 3H), 7.21 (d, *J* = 8.6 Hz, 2H), 6.87 (d, *J* = 8.6 Hz, 2H), 6.73 (d, *J* = 15.9 Hz, 1H), 6.36 (br s, 1H), 6.29 (dd, *J* = 15.9, 6.8 Hz, 1H), 5.77 (dd, *J* = 6.8, 1.3 Hz, 1H), 4.45 (dd, *J* = 14.6, 5.6 Hz, 1H), 4.41 (dd, *J* = 14.6, 5.6 Hz, 1H), 3.79 (s, 3H), 2.17 (s, 3H); **<sup>13</sup>C-NMR** ( $\delta$ , ppm) (CDCl<sub>3</sub>, 100.6 MHz) 169.2, 167.9, 159.1, 135.5, 134.9, 129.6, 129.1, 128.6, 128.4, 126.8, 122.3, 114.1, 74.5, 55.3, 42.9, 21.0; **IR** ( $\nu$ , cm<sup>-1</sup>) 3296, 2934, 1742, 1662, 1613, 1513, 1450, 1371, 1301, 1231, 1177, 1111, 1070, 1033; **HRMS** (EI) Calcd. for C<sub>19</sub>H<sub>21</sub>NO<sub>4</sub>: 339.1471 found: 339.1479

#### (*E*)-1-(3,4-dimethoxyphenethylamino)-1-oxo-4-phenylbut-3-en-2-yl acetate (**1f**)

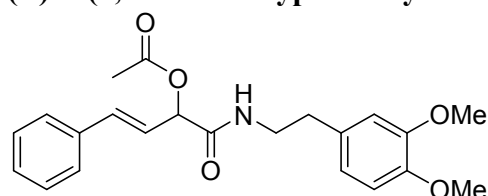

Compound **1f** was prepared according to the general procedure A. Purification by flash chromatography with a gradient PE/Et<sub>2</sub>O (from 30/70 to 0/100) as eluant gave the desired product (580 mg, 76%) as a yellow solid. **Mp** 115 – 116°C; **<sup>1</sup>H-NMR** ( $\delta$ , ppm) (CDCl<sub>3</sub>, 400 MHz) 7.38-7.28 (m, 5H), 6.76-6.67 (m, 4H), 6.23 (dd, *J* = 15.9, 6.8 Hz, 1H), 6.05 (br s, 1H), 5.70 (dd, *J* = 6.8, 1.0 Hz, 1H), 3.84 (s, 3H), 3.83 (s, 3H), 3.61-3.47 (m, 2H), 2.79 (dt, *J* = 6.6, 2.8 Hz, 2H), 2.13 (s, 3H); **<sup>13</sup>C-NMR** ( $\delta$ , ppm) (CDCl<sub>3</sub>, 100.6 MHz) 169.1, 168.0, 149.0, 147.7, 135.5, 134.7, 131.0,

128.6, 128.4, 126.8, 122.4, 120.7, 111.9, 111.2, 74.4, 55.9, 55.8, 40.5, 35.0, 20.9 ; **IR** ( $\nu$ ,  $\text{cm}^{-1}$ ) 3304, 2937, 1745, 1666, 1515, 1453, 1371, 1261, 1231, 1158, 1141, 1025 ; **HRMS** (EI) Calcd. for  $\text{C}_{22}\text{H}_{25}\text{NO}_5$ : 383.1733 found : 383.1731

**Acetic acid 1-(4-chloro-benzylcarbamoyl)-3-(4-methoxy-phenyl)-allyl ester (1g)**

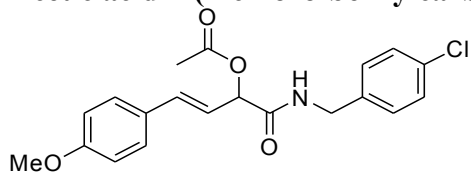

Compound **1g** was prepared according to general procedure A. Purification by flash chromatography with a gradient  $\text{Et}_2\text{O}/\text{EP}$  (30/70 to 100/0) gave the desired product (734 mg, 65%) as a cream solid. **CCM** Rf (80/20  $\text{Et}_2\text{O}/\text{EP}$ ) = 0.31 ; **Mp** 92 – 94°C ;  **$^1\text{H-NMR}$**  ( $\delta$ , ppm) ( $\text{CDCl}_3$ , 400 MHz) 7.30 (m, 5H), 7.21 (m, 3H), 6.85 (d,  $J=8.8\text{Hz}$ , 2H), 6.69 (d,  $J=15.6\text{Hz}$ , 1H), 6.41 (br s, 1H), 6.12 (dd,  $J=16.0, 7.2\text{Hz}$ , 1H), 5.72 (d,  $J=7.2\text{Hz}$ , 1H), 4.44 (m, 2H), 3.81 (s, 3H) ;  **$^{13}\text{C-NMR}$**  ( $\delta$ , ppm) ( $\text{CDCl}_3$ , 100.6 MHz) 169.9 (Cq), 169.0 (Cq), 161.53 (Cq), 160.4 (Cq), 136.7 (Cq), 135.5 (CH), 133.9 (Cq), 129.6 (2CH), 129.5 (2CH), 129.3 (2CH), 128.6 (2CH), 120.2 (CH), 114.5 (2CH), 75.2 (CH), 55.7 (OMe), 43.1 ( $\text{CH}_2$ ), 21.4 (Me) ; **IR** ( $\nu$ ,  $\text{cm}^{-1}$ ) 3275, 3048, 2931, 2836, 1739, 1656, 1605, 1509, 1490, 1370, 1221, 1173, 1088, 1013 ; **HRMS** (EI) Calcd. for  $\text{C}_{20}\text{H}_{20}\text{ClNO}_4$  : 373.1081 found : 373.1085

**(E)-1-((4-chlorobenzyl)amino)-4-(2-nitrophenyl)-1-oxobut-3-en-2-yl acetate (1h)**

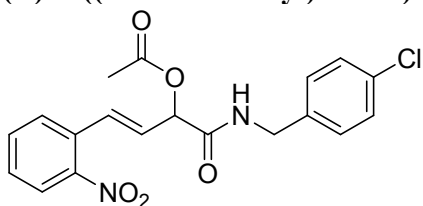

Compound **1h** was prepared according to the general procedure A. Purification by flash chromatography with a gradient  $\text{PE}/\text{AcOEt}$  (from 70/30 to 50/50) as eluant gave the desired product (763 mg, 65%) as a yellow solid. **Mp** 106 – 107°C ;  **$^1\text{H-NMR}$**  ( $\delta$ , ppm) ( $\text{CDCl}_3$ , 400 MHz) 7.99 (d,  $J = 8.1\text{ Hz}$ , 1H), 7.60-7.59 (m, 2H), 7.47-7.43 (m, 1H), 7.31 (d,  $J = 8.1\text{ Hz}$ , 2H), 7.23-7.17 (m, 3H), 6.50 (t,  $J = 5.8\text{ Hz}$ , 1H), 6.36 (dd,  $J = 15.9, 5.8\text{ Hz}$ , 1H), 5.85 (dd,  $J = 5.8, 1.3\text{ Hz}$ , 1H), 4.50 (dd,  $J = 14.9, 5.8\text{ Hz}$ , 1H), 4.45 (dd,  $J = 14.9, 5.8\text{ Hz}$ , 1H), 2.23 (s, 3H) ;  **$^{13}\text{C-NMR}$**  ( $\delta$ , ppm) ( $\text{CDCl}_3$ , 100.6 MHz) 169.1, 167.5, 147.7, 136.0, 133.5, 133.4, 131.6, 129.0, 129.0, 128.9, 128.9, 128.9, 127.9, 124.7, 73.6, 42.7, 20.9 ; **IR** ( $\nu$ ,  $\text{cm}^{-1}$ ) 3294, 2934, 1745, 1665, 1523, 1492, 1345, 1227, 1091, 1016 ; **HRMS** (EI) Calcd. for  $\text{C}_{19}\text{H}_{17}\text{ClN}_2\text{O}_5$  : 388.0826 found : 388.0824

**(E)-1-((4-methoxybenzyl)amino)-4-(2-nitrophenyl)-1-oxobut-3-en-2-yl acetate (1i)**

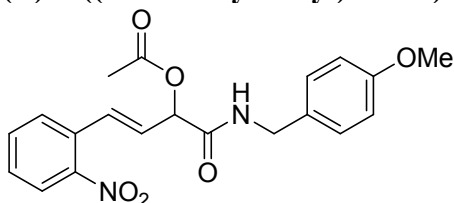

Compound **1i** was prepared according to the general procedure A. Purification by flash chromatography with a gradient  $\text{PE}/\text{AcOEt}$  (from 50/50 to 40/60) as eluant gave the desired product (660 mg, 57%) as a yellow solid. **Mp** 119 – 120°C ;  **$^1\text{H-NMR}$**  ( $\delta$ , ppm) ( $\text{CDCl}_3$ , 400 MHz) 7.97 (d,  $J = 8.1\text{ Hz}$ , 1H), 7.60-7.58 (m, 2H), 7.46-7.41 (m, 1H), 7.22 (d,  $J = 8.8\text{ Hz}$ , 2H), 7.18 (dd,  $J = 15.9, 1.5\text{ Hz}$ , 1H), 6.87 (d,  $J = 8.8\text{ Hz}$ , 2H), 6.43 (t,  $J = 5.5\text{ Hz}$ , 1H), 6.38 (dd,  $J = 15.9, 5.8\text{ Hz}$ , 1H),

5.85 (dd,  $J = 5.8, 1.5$  Hz, 1H), 4.46 (dd,  $J = 14.9, 5.5$  Hz, 1H), 4.41 (dd,  $J = 14.9, 5.5$  Hz, 1H), 3.79 (s, 3H), 2.21 (s, 3H) ;  $^{13}\text{C-NMR}$  ( $\delta$ , ppm) ( $\text{CDCl}_3$ , 100.6 MHz) 169.0, 167.3, 159.1, 147.7, 133.4, 131.7, 129.5, 129.1, 128.9, 128.8, 128.6, 128.1, 124.7, 114.2, 73.5, 55.3, 42.9, 20.9 ; **IR** ( $\nu$ ,  $\text{cm}^{-1}$ ) 3299, 2936, 1744, 1667, 1517, 1346, 1234, 1175, 1036 ; **HRMS** (EI) Calcd. for  $\text{C}_{20}\text{H}_{20}\text{N}_2\text{O}_6$  : 384.1321 found : 384.1327

#### Acetic acid 1-(4-chloro-benzylcarbamoyl)-3-furan-2-yl-allyl ester (**1j**)

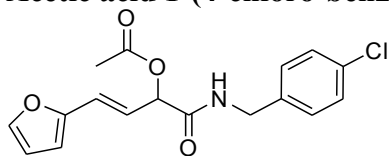

Compound **1j** was prepared according to general procedure Abis. Purification by flash chromatography with a gradient  $\text{Et}_2\text{O}/\text{EP}$  (25/75 to 75/25) gave the desired product (451 mg, 62%) as a brown solid. **CCM** Rf (80/20  $\text{Et}_2\text{O}/\text{EP}$ ) = 0.44 ; **Mp** 86 – 88°C ;  $^1\text{H-NMR}$  ( $\delta$ , ppm) ( $\text{CDCl}_3$ , 400 MHz) 7.36 (br s, 1H), 7.30 (d,  $J=8.4\text{Hz}$ , 2H), 7.20 (d,  $J=8.4\text{Hz}$ , 2H), 6.55 (d,  $J=16\text{Hz}$ , 2H), 6.40 (br s, 1H), 6.37 (dd,  $J=3.6, 2.0\text{Hz}$ , 1H), 6.32 (d,  $J=3.2\text{Hz}$ , 1H), 6.18 (dd,  $J=15.6, 6.8\text{Hz}$ , 1H), 5.76 (d,  $J=7.2\text{Hz}$ , 1H), 4.45 (m, 2H), 2.17 (s, 3H) ;  $^{13}\text{C-NMR}$  ( $\delta$ , ppm) ( $\text{CDCl}_3$ , 100.6 MHz) 169.3 (Cq), 168.1 (Cq), 151.2 (Cq), 142.8 (CH), 136.2 (Cq), 133.5 (Cq), 129.1 (2CH), 129.0 (2CH), 123.2 (CH), 120.4 (CH), 111.5 (CH), 110.2 (CH), 74.2 (CH), 42.7 ( $\text{CH}_2$ ), 21.0 ( $\text{CH}_3$ ) ; **IR** ( $\nu$ ,  $\text{cm}^{-1}$ ) 3725, 3627, 3292, 3082, 2933, 1742, 1662, 1538, 1491, 1371, 1226, 1091, 1015 ; **HRMS** (EI) Calcd. for  $\text{C}_{17}\text{H}_{16}\text{ClNO}_4$  : 333.0768 found : 333.0771

#### (*E*)-1-(cyclohexylamino)-4-(furan-2-yl)-1-oxobut-3-en-2-yl acetate (**1k**)

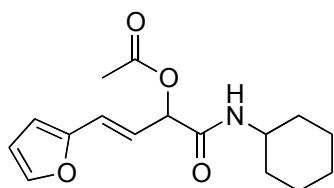

Compound **1k** was prepared according to the general procedure A. Purification by flash chromatography with a gradient  $\text{PE}/\text{Et}_2\text{O}$  (from 30/70 to 0/100) as eluant gave the desired product (267 mg, 46%) as a yellow solid. **Mp** 133 – 134°C ;  $^1\text{H-NMR}$  ( $\delta$ , ppm) ( $\text{CDCl}_3$ , 400 MHz) ; 7.35 (d,  $J = 1.8$  Hz, 1H), 6.54 (d,  $J = 15.9$  Hz, 1H), 6.37 (dd,  $J = 3.3, 1.8$  Hz, 1H), 6.31 (d,  $J = 3.3$  Hz, 1H), 6.16 (dd,  $J = 15.9, 7.1$  Hz, 1H), 5.89 (d,  $J = 7.8$  Hz, 1H), 5.67 (d,  $J = 7.1$  Hz, 1H), 3.84-3.74 (m, 1H), 2.19 (s, 3H), 1.94-1.91 (m, 2H), 1.73-1.59 (m, 3H), 1.42-1.32 (m, 2H), 1.21-1.12 (m, 3H) ;  $^{13}\text{C-NMR}$  ( $\delta$ , ppm) ( $\text{CDCl}_3$ , 100.6 MHz) 169.1, 166.8, 151.4, 142.6, 122.8, 121.0, 111.4, 109.8, 74.2, 48.2, 33.0, 33.0, 25.4, 24.8, 21.1 ; **IR** ( $\nu$ ,  $\text{cm}^{-1}$ ) 3287, 2930, 2858, 1744, 1655, 1546, 1453, 1371, 1230, 1155, 1107, 1021 ; **HRMS** (EI) Calcd. for  $\text{C}_{16}\text{H}_{21}\text{NO}_4$  : 291.1471 found : 291.1461

#### Acetic acid 1-(4-chloro-benzylcarbamoyl)-2-methyl-3-phenyl-allyl ester (**1l**)

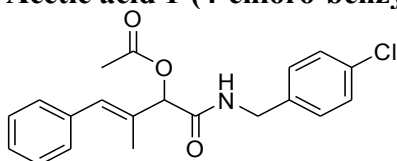

Compound **1l** was prepared according to the general procedure Abis. Purification by flash chromatography with a gradient  $\text{Et}_2\text{O}/\text{EP}$  (from 20/80 to 100/0) as eluant gave the desired product (804 mg, 75%) as a brown solid. **CCM** Rf (80/20  $\text{Et}_2\text{O}/\text{EP}$ ) = 0.25 ; **Mp** 92 – 93°C ;  $^1\text{H-NMR}$  ( $\delta$ , ppm) ( $\text{CDCl}_3$ , 400 MHz) 7.36 (m, 3H), 7.31 (m, 4H), 7.25 (d,  $J=8.4\text{Hz}$ , 2H), 6.76 (s, 1H), 6.51 (br

s, 1H), 5.71 (s, 1H), 4.48 (m, 2H), 2.22 (s, 3H), 1.95 (s, 3H) ;  $^{13}\text{C-NMR}$  ( $\delta$ , ppm) ( $\text{CDCl}_3$ , 100.6 MHz) 169.3 (Cq), 168.1 (Cq), 136.5 (Cq), 136.2 (Cq), 133.5 (Cq), 132.0 (Cq), 131.7 (CH), 129.2 (CH), 129.1 (4CH), 129.0 (2CH), 128.3 (2CH), 127.3 (CH), 79.2 (CH), 42.7 ( $\text{CH}_2$ ), 21.1 ( $\text{CH}_3$ ), 14.2 ( $\text{CH}_3$ ) ; **IR** ( $\nu$ ,  $\text{cm}^{-1}$ ) 3281, 3055, 2922, 1737, 1655, 1523, 1490, 1368, 1221, 1088, 1014 ; **HRMS** (EI) Calcd. for  $\text{C}_{20}\text{H}_{20}\text{ClNO}_3$  : 357.1132 found : 357.1136

**(E)-1-((4-chlorobenzyl)amino)-1-oxohept-3-en-2-yl acetate (1m)**

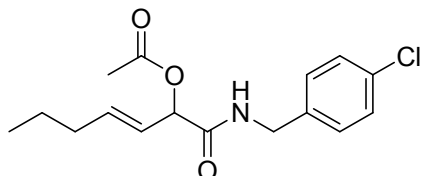

Compound **1m** was prepared according to the general procedure A. Purification by flash chromatography with a gradient PE/AcOEt (from 80/20 to 70/30) as eluant gave the desired product (647 mg, 71%) as a yellow oil.  $^1\text{H-NMR}$  ( $\delta$ , ppm) ( $\text{CDCl}_3$ , 400 MHz) 7.30 (d,  $J = 8.3$  Hz, 2H), 7.19 (d,  $J = 8.3$  Hz, 2H), 6.29 (br s, 1H), 5.93-5.84 (m, 1H), 5.59-5.53 (m, 2H), 4.46 (dd,  $J = 14.9$ , 5.8 Hz, 1H), 4.41 (dd,  $J = 14.9$ , 5.8 Hz, 1H), 2.14 (s, 3H), .206 (q,  $J = 7.3$  Hz, 2H), 1.41 (sext,  $J = 7.3$  Hz, 2H), 0.89 (t,  $J = 7.3$  Hz, 3H) ;  $^{13}\text{C-NMR}$  ( $\delta$ , ppm) ( $\text{CDCl}_3$ , 100.6 MHz) 169.3, 168.6, 137.7, 136.3, 133.4, 129.0, 128.9, 123.3, 74.7, 42.5, 34.2, 21.8, 21.0, 13.6 ; **IR** ( $\nu$ ,  $\text{cm}^{-1}$ ) 3299, 2961, 2929, 1744, 1663, 1534, 1496, 1374, 1231, 1095, 1018 ; **HRMS** (EI) Calcd. for  $\text{C}_{16}\text{H}_{20}\text{ClNO}_3$  : 309.1132 found : 309.1129

**Acetic acid 1-tert-butylcarbamoyl-3-(4-methoxy-phenyl)-allyl ester (1n)**

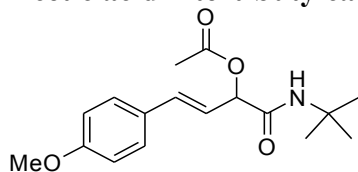

Compound **1n** was prepared according to general procedure Abis. Purification by flash chromatography with a gradient  $\text{Et}_2\text{O}/\text{EP}$  (20/80 to 60/40) gave the desired product (358 mg, 39%) as a yellow solid. **CCM** Rf (80/20  $\text{Et}_2\text{O}/\text{EP}$ ) = 0.18 ;  $^1\text{H-NMR}$  ( $\delta$ , ppm) ( $\text{CDCl}_3$ , 400 MHz) 7.32 (d,  $J=7.6\text{Hz}$ , 2H), 6.84 (d,  $J=8.0\text{Hz}$ , 2H), 6.66 (d,  $J=16.0\text{Hz}$ , 1H), 6.10 (dd,  $J=16.0$ , 7.2Hz, 1H), 5.84 (brs, 1H), 5.58 (d,  $J=7.2\text{Hz}$ , 1H), 3.79 (s, 3H), 2.18 (s, 3H), 1.36 (s, 9H) ;  $^{13}\text{C-NMR}$  ( $\delta$ , ppm) ( $\text{CDCl}_3$ , 100.6 MHz) 170.0 (Cq), 168.0 (Cq), 160.4 (Cq), 135.2 (CH), 128.7 (2CH), 121.0 (CH), 114.6 (2CH), 75.6 (CH), 55.9 (CH, OMe), 52.1 (Cq, tBu), 29.3 (3 $\text{CH}_3$ , tBu), 21.7 (Me) ; **IR** ( $\nu$ ,  $\text{cm}^{-1}$ ) 3306, 2965, 1738, 1665, 1606, 1509, 1454, 1364, 1218, 1173, 1028. ; **HRMS** (EI) Calcd. for  $\text{C}_{17}\text{H}_{23}\text{NO}_4$  : 305.1627 found : 305.1621

**2-(3-Cyclohexylcarbamoyl-1-phenyl-allyl)-malonic acid dimethyl ester (2a)**

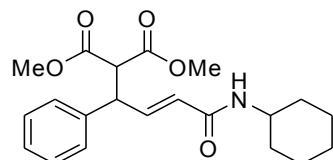

Compound **2a** was prepared according to the general procedure B. Purification by flash chromatography with a gradient  $\text{Et}_2\text{O}/\text{PE}$  (from 20/80 to 80/20) as eluant gave the desired product (190 mg, 77%) as a yellow solid. **CCM** Rf (80/20  $\text{Et}_2\text{O}/\text{EP}$ ) = 0.20 ; **Mp** 151 – 152°C ;  $^1\text{H-NMR}$  ( $\delta$ , ppm) ( $\text{CDCl}_3$ , 400 MHz) 7.33 (m, 2H), 7.29 (d,  $J=5.2\text{Hz}$ , 1H), 7.25 (m, 2H), 6.93 (1H, dd,  $J=14.8$ , 8.0Hz, 1H), 5.78 (d,  $J=15.2\text{Hz}$ , 1H), 5.33 (d,  $J=8.0\text{Hz}$ , 1H), 4.25 (t,  $J=11.2\text{Hz}$ , 1H), 3.92 (d,  $J=11.2\text{Hz}$ , 1H), 3.82 (m, 1H), 3.77 (s, 3H), 3.50 (s, 3H), 1.92 (m, 2H), 1.72 (m, 2H), 1.63 (m,

2H), 1.35 (m, 2H), 1.15 (m, 2H) ;  $^{13}\text{C-NMR}$  ( $\delta$ , ppm) ( $\text{CDCl}_3$ , 100.6 MHz) 168.0 (Cq), 167.5 (Cq), 164.1 (Cq), 142.1 (CH), 138.5 (Cq), 128.9 (2CH), 128.2 (2CH), 127.6 (CH), 125.9 (CH), 56.9 (CH), 52.8 ( $\text{CH}_3$ ), 52.6 ( $\text{CH}_3$ ), 48.3 (CH), 48.0 (CH), 33.1 (2 $\text{CH}_2$ ), 25.5 ( $\text{CH}_2$ ), 24.8 (2 $\text{CH}_2$ ) ; **IR** ( $\nu$ ,  $\text{cm}^{-1}$ ) 3274, 2930, 2853, 1737, 1667, 1626, 1541, 1452, 1434, 1255, 1152 ; **HRMS** (EI) Calcd. for  $\text{C}_{21}\text{H}_{27}\text{NO}_5$  : 373.1889 found : 373.1887

**(E)-dimethyl 2-(1-(tert-butylamino)-1-oxo-4-phenylbut-3-en-2-yl)malonate (2c)**

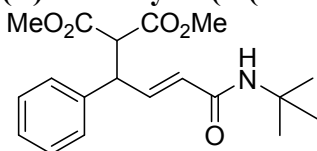

Compound **2c** was prepared according to the general procedure B. by flash chromatography with a gradient PE/Et<sub>2</sub>O (from 60/40 to 50/50) as eluant gave the desired product (110 mg, 87%) as an yellow oil.  $^1\text{H-NMR}$  ( $\delta$ , ppm) ( $\text{CDCl}_3$ , 400 MHz) 7.32-7.28 (m, 2H), 7.25-7.20 (m, 3H), 6.87 (dd,  $J$  = 15.2, 8.3 Hz, 1H), 5.69 (d,  $J$  = 15.2 Hz, 1H), 5.23 (br s, 1H), 4.22 (dd,  $J$  = 10.9, 8.3 Hz, 1H), 3.88 (d,  $J$  = 10.9 Hz, 1H), 3.75 (s, 3H), 3.46 (s, 3H), 1.34 (s, 9H) ;  $^{13}\text{C-NMR}$  ( $\delta$ , ppm) ( $\text{CDCl}_3$ , 100.6 MHz) 167.9, 167.4, 164.3, 141.7, 138.5, 128.8, 128.2, 127.5, 126.6, 56.8, 52.8, 52.5, 51.4, 47.8, 28.7 ; **IR** ( $\nu$ ,  $\text{cm}^{-1}$ ) 3291, 2962, 2931, 1738, 1668, 1632, 1541, 1454, 1436, 1362, 1261, 1224, 1154 ; **HRMS** (EI) Calcd. for  $\text{C}_{19}\text{H}_{25}\text{NO}_5$  : 347.1733 found : 347.1733

**(E)-dimethyl 2-(1-(4-chlorobenzylamino)-1-oxo-4-phenylbut-3-en-2-yl)malonate (2d)**

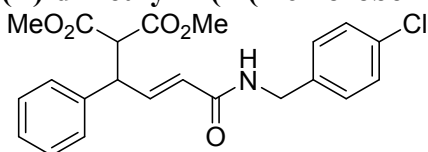

Compound **2d** was prepared according to the general procedure B. Purification by flash chromatography with a gradient PE/Et<sub>2</sub>O (from 40/60 to 20/80) as eluant gave the desired product (83 mg, 69%) as an yellow solid. **Mp** 86 – 87°C ;  $^1\text{H-NMR}$  ( $\delta$ , ppm) ( $\text{CDCl}_3$ , 400 MHz) 7.31-7.25 (m, 5H), 7.23-7.16 (m, 4H), 6.98 (dd,  $J$  = 15.2, 8.3 Hz, 1H), 5.89 (t,  $J$  = 5.8 Hz, 1H), 5.81 (d,  $J$  = 15.2 Hz, 1H), 4.44 (dd,  $J$  = 14.9, 5.8 Hz, 1H), 4.38 (dd,  $J$  = 14.9, 5.8 Hz, 1H), 4.23 (dd,  $J$  = 10.8, 8.3 Hz, 1H), 3.89 (d,  $J$  = 10.8 Hz, 1H), 3.73 (s, 3H), 3.46 (s, 3H) ;  $^{13}\text{C-NMR}$  ( $\delta$ , ppm) ( $\text{CDCl}_3$ , 100.6 MHz) 167.8, 167.4, 165.0, 143.2, 138.3, 136.6, 133.3, 129.2, 128.8, 128.8, 128.1, 127.6, 125.0, 56.7, 52.8, 52.5, 47.9, 42.9 ; **IR** ( $\nu$ ,  $\text{cm}^{-1}$ ) 2956, 1736, 1668, 1633, 1538, 1491, 1434, 1259, 1149, 1091, 1015 ; **HRMS** (EI) Calcd. for  $\text{C}_{22}\text{H}_{22}\text{ClNO}_5$  : 415.1187 found : 415.1187

**(E)-dimethyl 2-(4-((4-methoxybenzyl)amino)-4-oxo-1-phenylbut-2-en-1-yl)malonate (2e)**

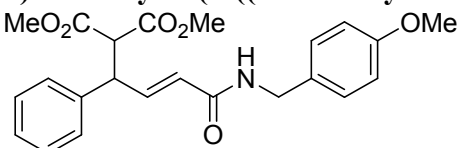

Compound **2e** was prepared according to the general procedure B. Purification by flash chromatography with a gradient PE/Et<sub>2</sub>O (from 20/80 to 0/100) as eluant gave the desired product (95 mg, 78%) as an yellow oil.  $^1\text{H-NMR}$  ( $\delta$ , ppm) ( $\text{CDCl}_3$ , 400 MHz) 7.31-7.27 (m, 2H), 7.24-7.19 (m, 3H), 7.17 (d,  $J$  = 8.6 Hz, 2H), 6.96 (dd,  $J$  = 15.2, 8.6 Hz, 1H), 6.83 (d,  $J$  = 8.6 Hz, 2H), 5.79-5.76 (m, 2H), 4.40 (dd,  $J$  = 14.9, 5.8 Hz, 1H), 4.35 (dd,  $J$  = 14.9, 5.8 Hz, 1H), 4.22 (dd,  $J$  = 10.9, 8.6 Hz, 1H), 3.89 (d,  $J$  = 10.9 Hz, 1H), 3.77 (s, 3H), 3.73 (s, 3H), 3.45 (s, 3H) ;  $^{13}\text{C-NMR}$  ( $\delta$ , ppm) ( $\text{CDCl}_3$ , 100.6 MHz) 167.8, 167.4, 164.8, 159.0, 142.8, 138.3, 130.0, 129.3, 128.8, 128.1, 127.5, 125.3, 114.0, 56.7, 55.2, 52.8, 52.5, 47.9, 43.1 ; **IR** ( $\nu$ ,  $\text{cm}^{-1}$ ) 3282, 2954, 1737, 1670, 1632, 1552,

1514, 1437, 1301, 1248, 1175, 1029 ; **HRMS** (EI) Calcd. for C<sub>23</sub>H<sub>25</sub>NO<sub>6</sub> : 411.1682 found : 411.1691

**(E)-dimethyl 2-(4-(3,4-dimethoxyphenethylamino)-4-oxo-1-phenylbut-2-enyl)malonate (2f)**

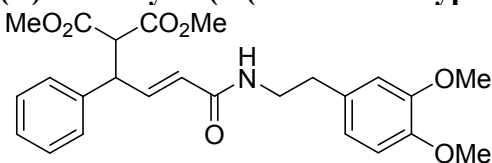

Compound **2f** was prepared according to the general procedure B. Purification by flash chromatography with a gradient PE/AcOEt (from 50/50 to 30/70) as eluant gave the desired product (171 mg, 72%) as a yellow solid. **Mp** 134 – 135°C ; **<sup>1</sup>H-NMR** ( $\delta$ , ppm) (CDCl<sub>3</sub>, 400 MHz) 7.31-7.28 (m, 2H), 7.25-7.19 (m, 3H), 6.92 (dd,  $J$  = 15.2, 8.6 Hz, 1H), 6.79 (d,  $J$  = 8.1 Hz, 1H), 6.71-6.67 (m, 2H), 5.72 (d,  $J$  = 15.2 Hz, 1H), 5.46 (t,  $J$  = 5.6 Hz, 1H), 4.21 (dd,  $J$  = 10.9, 8.6 Hz, 1H), 3.88 (d,  $J$  = 10.9, 1H), 3.85 (s, 3H), 3.82 (s, 3H), 3.72 (s, 3H), 3.57-3.48 (m, 2H), 3.47 (s, 3H), 2.75 (t,  $J$  = 7.1 Hz, 2H) ; **<sup>13</sup>C-NMR** ( $\delta$ , ppm) (CDCl<sub>3</sub>, 100.6 MHz) 167.8, 167.4, 165.0, 149.0, 147.7, 142.6, 138.4, 131.2, 128.8, 128.1, 127.6, 125.4, 120.5, 111.8, 111.3, 56.8, 55.9, 55.8, 52.8, 52.5, 47.9, 40.8, 35.1 ; **IR** ( $\nu$ , cm<sup>-1</sup>) 3285, 2957, 1737, 1670, 1628, 1544, 1517, 1454, 1433, 1321, 1259, 1234, 1196, 1147, 1029 ; **HRMS** (EI) Calcd. for C<sub>25</sub>H<sub>29</sub>NO<sub>7</sub> : 455.1944 found : 455.1953

**2-[3-(4-Chloro-benzylcarbamoyl)-1-(4-methoxy-phenyl)-allyl]-malonic acid dimethyl ester (2g)**

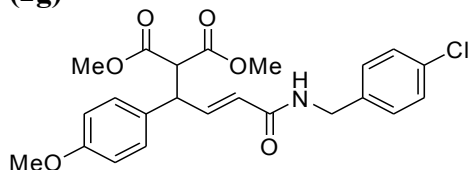

Compound **2g** was prepared according to the general procedure B. Purification by flash chromatography with a gradient Et<sub>2</sub>O/PE (from 20/80 to 100/0) as eluant gave the desired product (90 mg, 75%) as a yellow solid. **CCM** R<sub>f</sub> (80/20 Et<sub>2</sub>O/EP) = 0.22 ; **Mp** 116 – 118°C ; **<sup>1</sup>H-NMR** ( $\delta$ , ppm) (CDCl<sub>3</sub>, 400 MHz) 7.27 (d,  $J$  = 5.6 Hz, 2H), 7.18 (d,  $J$  = 6.8 Hz, 2H), 7.12 (d,  $J$  = 7.2 Hz, 2H), 6.96 (dd,  $J$  = 15.2, 8.4 Hz, 1H), 6.83 (d,  $J$  = 7.2 Hz, 2H), 5.96 (br s, 1H), 5.79 (d,  $J$  = 15.2 Hz, 1H), 4.44 (dd,  $J$  = 11.2, 6.0 Hz, AB, 1H), 4.37 (dd,  $J$  = 14.2, 6.0 Hz, AB, 1H), (dd, 4.19 (t,  $J$  = 9.2 Hz, 1H), 3.84 (d,  $J$  = 10.8 Hz, 1H), 3.77 (s, 3H), 3.73 (s, 3H), 3.48 (s, 3H) ; **<sup>13</sup>C-NMR** ( $\delta$ , ppm) (CDCl<sub>3</sub>, 100.6 MHz) 168.0 (Cq), 167.5 (Cq), 165.1 (Cq), 159.0 (Cq), 143.5 (CH), 136.6 (Cq), 133.5 (Cq), 130.22 (Cq), 129.3 (4CH), 128.8 (2CH), 124.8 (CH), 114.3 (2CH), 57.0 (CH), 55.2 (CH<sub>3</sub>, OMe), 52.8 (CH<sub>3</sub>, OMe), 52.6 (CH<sub>3</sub>, OMe), 47.2 (CH), 43.0 (CH<sub>2</sub>) ; **IR** ( $\nu$ , cm<sup>-1</sup>) 3275, 3066, 2952, 2838, 1735, 1666, 1631, 1511, 1434, 1248, 1178, 1091, 1031 ; **HRMS** (EI) Calcd. for C<sub>23</sub>H<sub>24</sub>ClNO<sub>6</sub> : 445.1292 found : 445.1289

**(E)-dimethyl 2-(4-((4-chlorobenzyl)amino)-1-(2-nitrophenyl)-4-oxobut-2-en-1-yl)malonate (2h)**

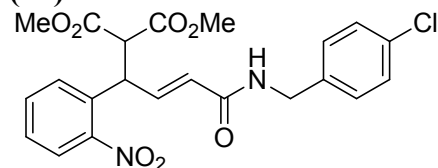

Compound **2h** was prepared according to the general procedure B. Purification by flash chromatography with a gradient PE/Et<sub>2</sub>O (from 50/50 to 0/100) as eluant gave the desired product (80 mg, 67%) as a beige solid. **Mp** 57 – 58°C ; **<sup>1</sup>H-NMR** ( $\delta$ , ppm) (CDCl<sub>3</sub>, 400 MHz) 7.78 (d,  $J$  =



7.6 Hz, 1H), 7.57 (t,  $J = 7.6$  Hz, 1H), 7.41 (d,  $J = 7.6$  Hz, 1H), 7.39 (t,  $J = 7.6$  Hz, 1H), 7.26 (d,  $J = 8.1$  Hz, 2H), 7.18 (d,  $J = 8.1$  Hz, 2H), 6.94 (dd,  $J = 14.9, 8.6$  Hz, 1H), 6.07-6.01 (m, 2H), 4.90 (dd,  $J = 10.9, 8.6$  Hz, 1H), 4.45 (dd,  $J = 14.9, 5.8$  Hz, AB, 1H), 4.38 (dd,  $J = 14.9, 5.8$  Hz, AB, 1H), 3.98 (d,  $J = 10.9$  Hz, 1H), 3.72 (s, 3H), 3.49 (s, 3H);  $^{13}\text{C-NMR}$  ( $\delta$ , ppm) ( $\text{CDCl}_3$ , 100.6 MHz) 167.2, 166.8, 164.7, 150.0, 140.8, 136.4, 133.3, 133.3, 133.0, 129.2, 129.2, 128.8, 128.3, 126.6, 124.7, 56.5, 53.0, 52.9, 43.0, 41.4; **IR** ( $\nu$ ,  $\text{cm}^{-1}$ ) 3282, 2953, 1740, 1670, 1636, 1524, 1493, 1437, 1356, 1294, 1252, 1165, 1095, 1014; **HRMS** (EI) Calcd. for  $\text{C}_{22}\text{H}_{21}\text{ClN}_2\text{O}_7$ : 460.1037 found: 460.1035

**(E)-dimethyl 2-(4-((4-chlorobenzyl)amino)-1-(2-nitrophenyl)-4-oxobut-2-en-1-yl)malonate (2i)**

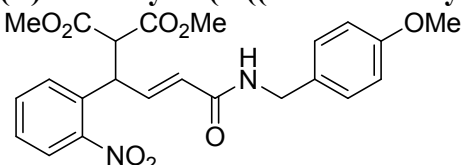

Compound **2i** was prepared according to the general procedure B. Purification by flash chromatography with a gradient PE/AcOEt (from 50/50 to 30/70) as eluant gave the desired product (88 mg, 74%) as a yellow oil.  $^1\text{H-NMR}$  ( $\delta$ , ppm) ( $\text{CDCl}_3$ , 400 MHz) 7.79 (d,  $J = 7.8$  Hz, 1H), 7.57 (t,  $J = 7.8$  Hz, 1H), 7.42 (d,  $J = 7.8$  Hz, 1H), 7.38 (t,  $J = 7.8$  Hz, 1H), 7.19 (d,  $J = 8.6$  Hz, 2H), 6.93 (dd,  $J = 15.2, 8.6$  Hz, 1H), 6.84 (d,  $J = 8.6$  Hz, 2H), 5.98 (d,  $J = 15.2$  Hz, 1H), 5.80 (t,  $J = 5.6$  Hz, 1H), 4.89 (dd,  $J = 10.6, 8.6$  Hz, 1H), 4.42 (dd,  $J = 14.7, 5.6$  Hz, AB, 1H), 4.37 (dd,  $J = 14.7, 5.6$  Hz, AB, 1H), 3.97 (d,  $J = 10.6$  Hz, 1H), 3.78 (s, 3H), 3.73 (s, 3H), 3.49 (s, 3H);  $^{13}\text{C-NMR}$  ( $\delta$ , ppm) ( $\text{CDCl}_3$ , 100.6 MHz) 167.2, 166.8, 164.5, 159.1, 150.1, 140.5, 133.4, 132.9, 129.9, 129.3, 129.2, 128.2, 126.8, 124.7, 114.1, 56.6, 55.3, 53.0, 52.8, 43.3, 41.3; **IR** ( $\nu$ ,  $\text{cm}^{-1}$ ) 3276, 2955, 1735, 1669, 1632, 1525, 1512, 1435, 1353, 1295, 1246, 1174, 1111, 1030; **HRMS** (EI) Calcd. for  $\text{C}_{23}\text{H}_{24}\text{N}_2\text{O}_8$ : 456.1533 found: 456.1545

**2-[3-(4-Chloro-benzylcarbamoyl)-1-furan-2-yl-allyl]-malonic acid dimethyl ester (2j)**

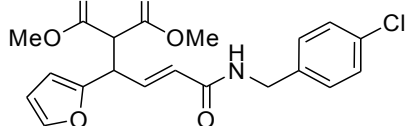

Compound **2j** was prepared according to the general procedure B. Purification by flash chromatography with a gradient  $\text{Et}_2\text{O/PE}$  (from 20/80 to 100/0) as eluant gave the desired product (90 mg, 37%) as a yellow solid. **CCM** Rf (80/20  $\text{Et}_2\text{O/EP}$ ) = 0.55; **Mp** 123 – 124°C;  $^1\text{H-NMR}$  ( $\delta$ , ppm) ( $\text{CDCl}_3$ , 400 MHz) 7.32 (s, 1H), 7.27 (d,  $J = 8.4$  Hz, 2H), 7.18 (d,  $J = 8.4$  Hz, 2H), 6.90 (dd,  $J = 15.2, 8.4$  Hz, 1H), 6.27 (s, 1H), 6.13 (s, 1H), 5.92 (br s, 1H), 5.87 (d,  $J = 14.8$  Hz, 1H), 4.42 (t,  $J = 6.0$  Hz, 2H), 4.36 (t,  $J = 9.2$  Hz, 1H), 3.89 (d,  $J = 10.4$  Hz, 1H), 3.71 (s, 3H), 3.61 (s, 3H);  $^{13}\text{C-NMR}$  ( $\delta$ , ppm) ( $\text{CDCl}_3$ , 100.6 MHz) 167.5 (Cq), 167.4 (Cq), 164.9 (Cq), 151.2 (Cq), 142.4 (CH), 140.1 (CH), 136.6 (Cq), 133.41 (Cq), 129.3 (2CH), 128.9 (2CH), 126.2 (CH), 110.5 (CH), 107.42 (CH), 55.0 (CH), 52.9 (2CH<sub>3</sub>), 43.0 (CH<sub>2</sub>), 41.4 (CH); **IR** ( $\nu$ ,  $\text{cm}^{-1}$ ) 3275, 2953, 1737, 1670, 1633, 1541, 1491, 1434, 1252, 1163, 1092, 1014; **HRMS** (EI) Calcd. for  $\text{C}_{20}\text{H}_{20}\text{ClNO}_6$ : 405.0979 found: 405.0987

**(E)-dimethyl 2-(1-(cyclohexylamino)-4-(furan-3-yl)-1-oxobut-3-en-2-yl)malonate (2k)**

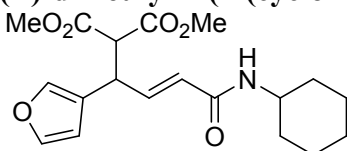

Compound **2k** was prepared according to the general procedure B. Purification by flash chromatography with a gradient PE/Et<sub>2</sub>O (from 70/30 to 20/80) as eluant gave the desired product (92 mg, 74%) as an yellow solid. **Mp** 141 – 142°C ; **<sup>1</sup>H-NMR (δ, ppm)** (CDCl<sub>3</sub>, 400 MHz) 7.33 (d, *J* = 1.8 Hz, 1H), 6.83 (dd, *J* = 15.2, 8.3 Hz, 1H), 6.28 (dd, *J* = 3.3, 1.8 Hz, 1H), 6.14 (d, *J* = 3.3 Hz, 1H), 5.81 (d, *J* = 15.2 Hz, 1H), 5.34 (br s, 1H), 4.36 (dd, *J* = 10.3, 8.3 Hz, 1H), 3.90 (d, *J* = 10.3 Hz, 1H), 3.85-3.75 (m, 1H), 3.73 (s, 3H), 3.62 (s, 3H), 1.93-1.89 (m, 2H), 1.71-1.59 (m, 3H), 1.40-1.31 (m, 2H), 1.19-1.07 (m, 3H) ; **<sup>13</sup>C-NMR (δ, ppm)** (CDCl<sub>3</sub>, 100.6 MHz) 167.5, 167.4, 163.9, 151.4, 142.3, 138.9, 126.9, 110.4, 107.2, 55.0, 52.8, 52.8, 48.3, 41.4, 33.1, 25.5, 24.8 ; **IR** (ν, cm<sup>-1</sup>) 3280, 2933, 2859, 1741, 1669, 1628, 1546, 1453, 1436, 1347, 1261, 1152, 1011 ; **HRMS** (EI) Calcd. for C<sub>19</sub>H<sub>25</sub>NO<sub>6</sub> : 363.1682 found : 363.1687

### 2-[3-(4-Chloro-benzylcarbamoyl)-2-methyl-1-phenyl-allyl]-malonic acid dimethyl ester (**2l**)

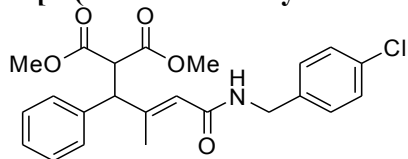

Compound **2l** was prepared according to the general procedure B. Purification by flash chromatography with a gradient Et<sub>2</sub>O/PE (from 20/80 to 100/0) as eluant gave the desired product (103 mg, 57%) as an yellow solid. **CCM Rf** (50/50 Et<sub>2</sub>O/EP) = 0.11 ; **Mp** 68°C ; **<sup>1</sup>H-NMR (δ, ppm)** (CDCl<sub>3</sub>, 400 MHz) 7.29 (m, 4H), 7.20 (m, 5H), 5.79 (s, 1H), 5.75 (br s, 1H), 4.42 (d, *J*=5.6Hz, 2H), 4.14 (d, *J*=12.0Hz, AB system, 1H), 4.11 (d, *J*=12.0Hz, AB system, 1H), 3.73 (s, 3H), 3.48 (s, 3H), 2.06 (s,3H) ; **<sup>13</sup>C-NMR (δ, ppm)** (CDCl<sub>3</sub>, 100.6 MHz) 168.1 (Cq), 167.6 (Cq), 166.1 (Cq), 153.0 (Cq), 137.8 (Cq), 136.9 (Cq), 133.3 (Cq), 129.3 (2CH), 128.9 (2CH), 128.7 (2CH), 128.1 (2CH), 127.7 (CH), 118.7 (CH), 55.1 (CH), 54.4 (CH), 53.0 (CH<sub>3</sub>), 52.7 (CH<sub>3</sub>), 42.8 (CH<sub>2</sub>), 17.0 (CH<sub>3</sub>) ; **IR** (ν, cm<sup>-1</sup>) 3293, 2951, 1736, 1635, 1524, 1433, 1091 ; **HRMS** (EI) Calcd. for C<sub>23</sub>H<sub>24</sub>ClNO<sub>5</sub> : 429.1343 found : 429.1339

### (*E*)-dimethyl 2-(1-((4-chlorobenzyl)amino)-1-oxohept-2-en-4-yl)malonate (**2m**)

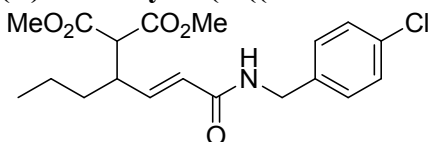

Compound **2m** was prepared according to the general procedure B. Purification by flash chromatography with a gradient PE/AcOEt (from 60/40 to 50/50) as eluant gave the desired product (53 mg, 43%) as a white solid. **Mp** 146 – 147°C ; **<sup>1</sup>H-NMR (δ, ppm)** (CDCl<sub>3</sub>, 400 MHz) 7.30 (d, *J* = 8.3 Hz, 2H), 7.22 (d, *J* = 8.3 Hz, 2H), 6.64 (dd, *J* = 15.2, 9.9 Hz, 1H), 5.85 (d, *J* = 15.2 Hz, 1H), 5.79 (br s, 1H), 4.48 (dd, *J* = 15.2, 5.8 Hz, AB, 1H), 4.43 (dd, *J* = 15.2, 5.8 Hz, AB,1H), 3.74 (s, 3H), 3.67 (s, 3H), 3.44 (d, *J* = 9.1 Hz, 1H), 2.97-2.89 (m, 1H), 1.45-1.30 (m, 3H), 1.26-1.16 (m, 1H), 0.87 (t, *J* = 7.1 Hz, 3H) ; **<sup>13</sup>C-NMR (δ, ppm)** (CDCl<sub>3</sub>, 100.6 MHz) 168.3, 168.2, 165.0, 143.8, 136.6, 133.3, 129.2, 128.8, 125.8, 56.0, 52.6, 52.4, 42.9, 42.1, 34.1, 20.2, 13.7 ; **IR** (ν, cm<sup>-1</sup>) 3286, 2956, 2932, 1737, 1668, 1623, 1531, 1492, 1434, 1301, 1255, 1173, 1150, 1092, 1016 ; **HRMS** (EI) Calcd. for C<sub>19</sub>H<sub>24</sub>ClNO<sub>5</sub> : 381.1343 found : 381.1349

### dimethyl 2-(1-(4-chlorobenzyl)-5-oxo-2-phenylpyrrolidin-2-yl)malonate (**3d**)

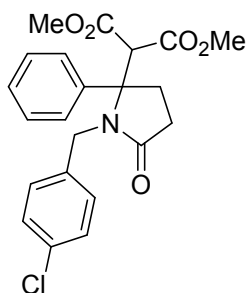

Compound **3d** was prepared according to the general procedure C. Purification by flash chromatography with a gradient PE/Et<sub>2</sub>O (from 20/80 to 30/70) as eluant gave the desired product (39 mg, 33%) as a yellow oil. **<sup>1</sup>H-NMR** ( $\delta$ , ppm) (CDCl<sub>3</sub>, 400 MHz) 7.25-7.15 (m, 5H), 7.07 (d,  $J$  = 8.3 Hz, 2H), 6.91 (d,  $J$  = 8.3 Hz, 2H), 4.39 (s, 1H), 4.25 (d,  $J$  = 15.2 Hz, 1H), 4.01 (d,  $J$  = 15.2 Hz, 1H), 3.66 (s, 3H), 3.57 (s, 3H), 3.36-3.28 (m, 1H), 2.70-2.66 (m, 2H), 2.60-2.52 (m, 1H); **<sup>13</sup>C-NMR** ( $\delta$ , ppm) (CDCl<sub>3</sub>, 100.6 MHz) 175.9, 167.1, 167.0, 142.6, 136.1, 132.8, 130.1, 128.7, 128.1, 128.1, 125.9, 69.1, 55.1, 52.9, 52.8, 44.0, 30.4, 29.9; **IR** ( $\nu$ , cm<sup>-1</sup>) 2953, 1754, 1733, 1678, 1492, 1434, 1395, 1328, 1265, 1203, 1142, 1092, 1016; **HRMS** (EI) Calcd. for C<sub>22</sub>H<sub>22</sub>ClNO<sub>5</sub>: 415.1187 found: 415.1184

### 2-[1-(4-Methoxy-benzyl)-5-oxo-2-phenylpyrrolidin-2-yl]-malonic acid dimethyl ester (**3e**)

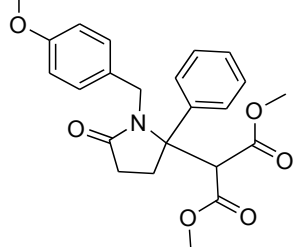

Compound **3e** was prepared according to the general procedure C. Purification by flash chromatography with a gradient Et<sub>2</sub>O/PE (from 20/80 to 100/0) as eluant gave the desired product (63 mg, 38%) as a yellow oil. **CCM** R<sub>f</sub> (80/20 Et<sub>2</sub>O/EP) = 0.42; **<sup>1</sup>H-NMR** ( $\delta$ , ppm) (CDCl<sub>3</sub>, 400 MHz) 7.20 (m, 3H), 6.91 (d,  $J$ =8.8Hz, 2H), 6.85 (t,  $J$ =8.8Hz, 2H), 6.65 (d,  $J$ =8.8 Hz, 2H), 4.39 (s, 1H), 4.31 (d,  $J$ =15.2Hz, 2H), 6.73 (s, 3H), 6.66 (s, 3H), 6.53 (s, 3H), 3.32 (m, AB system, 1H), 2.68 (m, 2H), 2.54 (m, AB system, 1H); **<sup>13</sup>C-NMR** ( $\delta$ , ppm) (CDCl<sub>3</sub>, 100.6 MHz) 175.9 (Cq), 167.3 (Cq), 167.2 (Cq), 158.6 (Cq), 142.9 (Cq), 130.1 (2CH), 128.7 (2CH), 128.1 (CH), 126.1 (2CH), 113.5 (2CH), 69.2 (Cq), 55.3 (CH<sub>3</sub>), 55.1 (CH), 52.9 (CH<sub>3</sub>), 52.8 (CH<sub>3</sub>), 44.0 (CH<sub>2</sub>), 30.5 (CH<sub>2</sub>), 30.1 (CH<sub>2</sub>); **IR** ( $\nu$ , cm<sup>-1</sup>) 3293, 2951, 2836, 1731, 1662, 1509, 1398, 1240, 1113, 1028; **HRMS** (EI) Calcd. for C<sub>23</sub>H<sub>25</sub>NO<sub>6</sub>: 411.1682 found: 411.1684

### 2-[1-(4-Chloro-benzyl)-2-(4-methoxy-phenyl)-5-oxo-pyrrolidin-2-yl]-malonic acid dimethyl ester (**3g**)

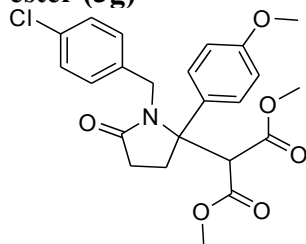

Compound **3g** was prepared according to the general procedure C. Purification by flash chromatography with a gradient Et<sub>2</sub>O/PE (from 20/80 to 100/0) as eluant gave the desired product (64 mg, 64%) as a yellow oil. **CCM** R<sub>f</sub> (80/20 Et<sub>2</sub>O/EP) = 0.17; **<sup>1</sup>H-NMR** ( $\delta$ , ppm) (CDCl<sub>3</sub>, 400 MHz) 7.08 (m, 4H), 6.90 (d,  $J$ =8.4Hz, 2H), 6.73 (d,  $J$ =8.4Hz, 2H), 4.35 (s, 1H), 4.17 (d,  $J$ =15.2Hz, AB system, 1H), 4.03 (d,  $J$ =15.2Hz, AB system, 1H), 3.77 (s, 3H), 3.66 (s, 3H), 3.56 (s, 3H), 3.30

(m, AB system, 1H), 2.65 (t, J=8.8Hz, 2H), 2.52 (m, AB system, 1H) ;  $^{13}\text{C-NMR}$  ( $\delta$ , ppm) ( $\text{CDCl}_3$ , 100.6 MHz) 175.8 (Cq), 167.2 (Cq), 167.1 (Cq), 159.2 (Cq), 136.4 (Cq), 134.4 (Cq), 132.7 (Cq), 130.1 (2CH), 128.1 (2CH), 127.3 (2CH), 113.9 (2CH), 68.8 (Cq), 55.4 ( $\text{CH}_3$ ), 55.1 (CH), 52.9 ( $\text{CH}_3$ ), 52.8 ( $\text{CH}_3$ ), 43.9 ( $\text{CH}_2$ ), 30.2 ( $\text{CH}_2$ ), 30.0 ( $\text{CH}_2$ ) ; **IR** ( $\nu$ ,  $\text{cm}^{-1}$ ) 2952, 2838, 1754, 1733, 1671, 1513, 1450, 1433, 1249, 1188, 1088, 1015 ; **HRMS** (EI) Calcd. for  $\text{C}_{23}\text{H}_{24}\text{ClNO}_6$  : 445.1292 found : 445.1292

### 2-[1-(4-Chloro-benzyl)-2-furan-2-yl-5-oxo-pyrrolidin-2-yl]-malonic acid dimethyl ester (3j)

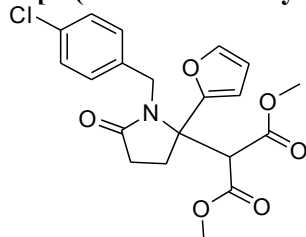

Compound **3j** was prepared according to the general procedure C. Purification by flash chromatography with a gradient  $\text{Et}_2\text{O/PE}$  (from 20/80 to 100/0) as eluant gave the desired product (48 mg, 53%) as an yellow oil. **CCM** Rf (80/20  $\text{Et}_2\text{O/EP}$ ) = 0.32 ;  $^1\text{H-NMR}$  ( $\delta$ , ppm) ( $\text{CDCl}_3$ , 400 MHz) 7.22 (s, 1H), 7.12 (d, J=8.4Hz, 2H), 6.98 (d, J=8.0 Hz, 2H), 6.23 (s, 1H), 6.21 (s, 1H), 4.32 (d, J=15.6Hz, AB system, 1H), 4.30 (s, 1H), 4.24 (d, J=15.6Hz, AB system, 1H), 3.64 (s, 3H), 3.56 (s, 3H), 3.21 (m, 2H), 2.61 (m, 2H) ;  $^{13}\text{C-NMR}$  ( $\delta$ , ppm) ( $\text{CDCl}_3$ , 100.6 MHz) 175.6 (Cq), 166.5 (Cq), 166.4 (Cq), 153.2 (Cq), 142.5 (CH), 135.9 (Cq), 132.8 (Cq), 129.5 (2CH), 128.3 (2CH), 110.6 (CH), 108.0 (CH), 65.1 (Cq), 54.1 (CH), 53.0 ( $\text{CH}_3$ ), 52.9 ( $\text{CH}_3$ ), 43.5 ( $\text{CH}_2$ ), 29.5 ( $\text{CH}_2$ ), 26.1 ( $\text{CH}_2$ ) ; **IR** ( $\nu$ ,  $\text{cm}^{-1}$ ) 3725, 3627, 3307, 2952, 1734, 1669, 1434, 1399, 1328, 1149, 1089, 1015 ; **HRMS** (EI) Calcd. for  $\text{C}_{20}\text{H}_{20}\text{ClNO}_6$  : 405.0979 found : 405.0982

### 2,4-Bis-methoxycarbonyl-pentanedioic acid dimethyl ester (4)

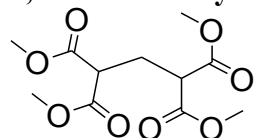

A mixture of dimethylmalonate (5.5 mL, 2.4eq), diiodomethane (1eq) and potassium carbonate (2.4 equiv) in 50 mL of DMF was stirred at room temperature during 24h, then at  $100^\circ\text{C}$  during 4h. 150 mL of diethyl ether was added. The crude was filtrated, washed with diethylether. The filtrate was washed with 2\*50 mL of water and 50mL of brine, and dried with  $\text{MgSO}_4$ . The crude was purified by silica gel column chromatography with a gradient of AcOEt in EP (10:90 to 30:70), to afford 2.66g of uncolored oil (48% yield). **CCM** Rf (30/70 AcOEt/EP) = 0.39 ;  $^1\text{H-NMR}$  ( $\delta$ , ppm) ( $\text{CDCl}_3$ , 400 MHz) 3.74 (s, 12H), 3.50 (t, J=7.6 Hz, 2H), 2.48 (t, J=7.6 Hz, 2H) ;  $^{13}\text{C-NMR}$  ( $\delta$ , ppm) ( $\text{CDCl}_3$ , 100.6 MHz) 139.0 (4Cq), 52.9 (4 $\text{CH}_3$ ), 49.0 (2CH), 27.4 ( $\text{CH}_2$ ) ; **IR** ( $\nu$ ,  $\text{cm}^{-1}$ ) 2956, 1728, 1434, 1198, 1149, 1033 ; **HRMS** (EI) Calcd. for  $\text{C}_{11}\text{H}_{16}\text{O}_8$  : 276.0845 found : 276.0847

### 4-(tert-Butylcarbamoyl-methyl)-5-phenyl-cyclopentane-1,1,3,3-tetracarboxylic tetramethyl ester (5c) acid

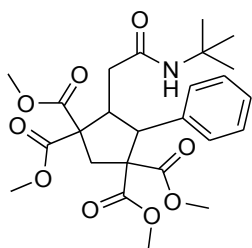

Compound **5c** was prepared according to the general procedure D. Purification by flash chromatography with a gradient Et<sub>2</sub>O/PE (from 50/50 to 70/30) as eluant gave the desired product (140 mg, 78%) as a yellow oil. **CCM** Rf (70/2=30 Et<sub>2</sub>O/EP) = 0.36 ; **<sup>1</sup>H-NMR** ( $\delta$ , ppm) (CDCl<sub>3</sub>, 400 MHz) 7.21 (m, 5H), 5.67 (br s, 1H), 3.89 (d, J=13.2 Hz, 1H), 3.78 (s, 3H), 3.70 (br s, 6H), 3.51 (m, 1H), 3.15 (d, J=16.0Hz, AB system, 1H), 3.08 (s, 3H), 2.95 (d, J=16.0Hz, AB system, 1H), 2.41 (dd, J<sup>1</sup>=14.8, 6.4 Hz, AB, 1H), 1.94 (dd, J<sup>1</sup>=16.0, 4.8 Hz, AB, 1H), 1.13 (s, 9H) ; **<sup>13</sup>C-NMR** ( $\delta$ , ppm) (CDCl<sub>3</sub>, 100.6 MHz) 171.8 (Cq), 171.2 (Cq), 170.9 (Cq), 170.5 (Cq), 169.6 (Cq), 136.4 (Cq), 128.2 (4CH), 127.7 (CH), 63.4 (Cq), 61.2 (Cq), 55.1 (CH), 53.1 (CH<sub>3</sub>), 52.9 (CH<sub>3</sub>), 52.8 (CH<sub>3</sub>), 52.4 (CH<sub>3</sub>), 50.8 (Cq), 46.1 (CH), 41.6 (CH<sub>2</sub>), 38.2 (CH<sub>2</sub>), 28.5 (3CH<sub>3</sub>) ; **IR** ( $\nu$ , cm<sup>-1</sup>) 3395, 2954, 1727, 1666, 1530, 1433, 1208, 1077 ; **HRMS** (EI) Calcd. for C<sub>25</sub>H<sub>33</sub>NO<sub>9</sub> : 491.2155 found : 491.2161

### 3-(4-Chloro-benzyl)-6-(4-methoxy-phenyl)-1,4-dioxo-tetrahydro-cyclopenta[e][1,2]oxazepine-7,7,8a-tricarboxylic acid trimethyl ester (**5g**)

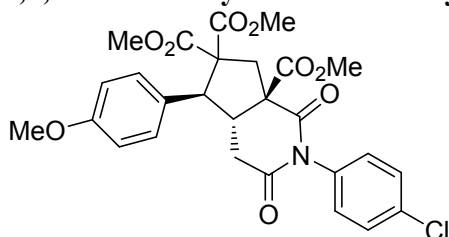

Compound **5g** was prepared according to the general procedure D. Purification by flash chromatography with a gradient AcOEt/PE (from 10/90 to 50/50) as eluant gave the desired product (159 mg, 67%) as white crystals. **CCM** Rf (50/50 AcOEt/EP) = 0.37 ; **Mp** 134 – 136°C ; **<sup>1</sup>H-NMR** ( $\delta$ , ppm) (CDCl<sub>3</sub>, 400 MHz) 7.27 (s, 4H), 7.10 (d, J=8.8Hz, 2H), 7.07 (d, J=8.8 Hz, 2H), 5.01 (d, J=14.4Hz, AB system, 1H), 4.92 (d, J=14.4Hz, AB system, 1H), 3.82 (d, J=12.8 Hz, 1H), 3.77 (s, 3H), 3.73 (s, 3H), 3.70 (s, 3H), 3.51 (d, J=14.8 Hz, AB system, 1H), 3.17 (d, J=14.8 Hz, AB system, 1H), 3.14 (s, 3H), 3.09 (dd, J=12.0, 5.6 Hz, 1H), 2.86 (dd, J=18.4, 6.4 Hz, AB system, 1H), 2.54 (dd, J=18.4, 6.4 Hz, AB system, 1H) ; **<sup>13</sup>C-NMR** ( $\delta$ , ppm) (CDCl<sub>3</sub>, 100.6 MHz) 171.6 (Cq), 170.0 (2Cq), 169.9 (Cq), 169.4 (Cq), 159.3 (Cq), 135.1 (Cq), 133.3 (Cq), 130.0 (2CH), 129.9 (2CH), 128.5 (2CH), 127.4 (Cq), 114.0 (2CH), 63.0 (Cq), 58.5 (Cq), 55.3 (CH<sub>3</sub>), 53.6 (CH<sub>3</sub>), 53.5 (CH<sub>3</sub>), 53.3 (CH), 52.6 (CH<sub>3</sub>), 43.2 (CH<sub>2</sub>), 42.3 (CH), 40.8 (CH<sub>2</sub>), 31.1 (CH<sub>2</sub>) ; **IR** ( $\nu$ , cm<sup>-1</sup>) 3002, 2953, 2840, 1726, 1677, 1610, 1514, 1433, 1089 ; **HRMS** (EI) Calcd. for C<sub>29</sub>H<sub>32</sub>ClNO<sub>10</sub> : 589.1715 found : 589.1721

### 4-(tert-Butylcarbamoyl-methyl)-5-(4-methoxy-phenyl)-cyclopentane-1,1,3,3-tetracarboxylic acid tetramethyl ester (**5n**)

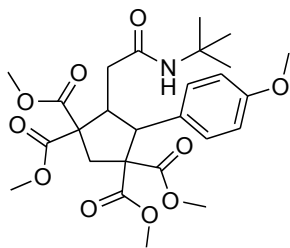

Compound **5n** was prepared according to the general procedure D. Purification by flash chromatography with with a gradient AcOEt/PE (from 10/90 to 30/70) as eluant gave the desired product (99 mg, 58%) as an uncolored oil. **CCM** Rf (50/50 AcOEt/EP) = 0.33 ; **<sup>1</sup>H-NMR** ( $\delta$ , ppm) (CDCl<sub>3</sub>, 400 MHz) 7.21 (d, J=8.8Hz, 2H), 6.78 (d, J=8.8Hz, 2H), 5.71 (br s, 1H), 3.85 (d, J=13.2 Hz, 1H), 3.80 (s, 3H), 3.74 (s, 6H), 3.73 (s, 3H), 3.47 (m, 1H), 3.18 (s, 3H), 3.15 (d, J=14.8 Hz, AB system, 1H), 2.96 (d, J=14.8 Hz, AB system, 1H), 2.41 (dd, J=14.8, 6.8Hz, 2H), 1.95 (dd, J=15.2, 6.8Hz, 2H), 1.17 (s, 9H) ; **<sup>13</sup>C-NMR** ( $\delta$ , ppm) (CDCl<sub>3</sub>, 100.6 MHz) 171.9 (Cq), 171.3 (Cq), 171.0 (Cq), 170.7 (Cq), 169.7 (Cq), 159.0 (Cq), 130.34 (2CH), 128.2 (Cq), 113.6 (2CH), 63.3 (Cq), 61.2 (Cq), 55.2 (CH<sub>3</sub>), 54.3 (CH), 53.1 (CH<sub>3</sub>), 52.9 (CH<sub>3</sub>), 52.8 (CH<sub>3</sub>), 52.6 (CH<sub>3</sub>), 50.9 (Cq), 46.1 (CH), 41.5 (CH<sub>2</sub>), 38.2 (CH<sub>2</sub>), 28.6 (3CH<sub>3</sub>) ; **IR** ( $\nu$ , cm<sup>-1</sup>) 3637, 3396, 2954, 2839, 1727, 1661, 1611, 1513, 1433, 1208, 1178, 1078 ; **HRMS** (EI) Calcd. for C<sub>26</sub>H<sub>35</sub>NO<sub>10</sub> : 521.2261 found : 521.2265

### 2-(1-Phenyl-ethylidene)-malononitrile (**6**)

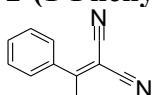

A mixture of acetophenone (5.6 mL, 1 eq), malononitrile (1 eq) and ammonium acetate (1.88 eq) in toluene (1 M) was stirred during 6h at reflux. The crude was diluted in Et<sub>2</sub>O and extracted with water and dried with MgSO<sub>4</sub>. The crude was purified by silica gel column chromatography with Et<sub>2</sub>O in EP (20:80), to afford 2.19 g of pale yellow solid ( 27% yield). **CCM** Rf (20/80 Et<sub>2</sub>O/EP) = 0.26 ; **Mp** 98 – 99°C ; **<sup>1</sup>H-NMR** ( $\delta$ , ppm) (CDCl<sub>3</sub>, 400 MHz) 7.54 (m, 5H), 2.64 (s, 3H) ; **<sup>13</sup>C-NMR** ( $\delta$ , ppm) (CDCl<sub>3</sub>, 100.6 MHz) 175.6 (Cq), 135.9 (Cq), 132.3 (CH), 129.2 (2CH), 127.4 (2CH), 112.9 (Cq), 112.8 (Cq), 84.7 (Cq), 24.3 (CH<sub>3</sub>) ; **IR** ( $\nu$ , cm<sup>-1</sup>) 3067, 2226, 1583, 1564, 1491, 1440, 1376, 1306, 1190, 1051 ; **HRMS** (EI) Calcd. for C<sub>11</sub>H<sub>8</sub>N<sub>2</sub> : 168.0687 found : 168.0695

### N-tert-Butyl-2-(2,2-dicyano-3,5-diphenyl-cyclopent-3-enyl)-acetamide (**7c**)

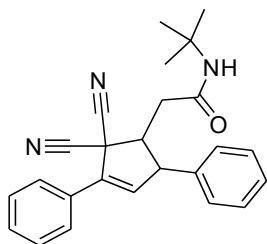

A mixture of Passerini adduct **1c** (200 mg, 1 eq), malonitrile derivative **6** (1 eq), cesium carbonate (1.2 eq) and tetrakis(triphenylphosphine)palladium (0.05 eq) in 1.3 mL of toluene was stirred at 50°C during 30min. Then the crude was heated under micro-wave at 120°C during 30min. The crude was purified by silica gel column chromatography with a gradient of Et<sub>2</sub>O in EP (20:80 to 30:70), to afford 84mg of yellow solid ( 30% yield). **CCM** : Rf (50/50 Et<sub>2</sub>O/EP) = 0.35 ; **Mp** 77 – 78°C ; **<sup>1</sup>H-NMR** ( $\delta$ , ppm) : (CDCl<sub>3</sub>, 400 MHz) 7.57 (d, J=7.2 Hz, 2H), 7.36 (m, 6H), 7.16 (d, J=7.6Hz, 2H), 6.34 (s, 1H), 5.48 (br s, 1H), 3.77 (d, J=9.2 Hz, 1H), 3.41 (qd, J=7.2Hz, 1H), 2.61 (d, J=7.2Hz, 2H), 1.26 (s, 9H) ; **<sup>13</sup>C-NMR** ( $\delta$ , ppm) (CDCl<sub>3</sub>, 100.6 MHz) : 166.4 (Cq), 138.0 (Cq), 136.7 (Cq), 135.5 (CH), 129.8 (Cq), 128.5 (CH), 128.2 (2CH), 128.0 (2CH), 127.1 (CH), 126.9 (2CH), 125.3 (2CH), 113.4 (Cq), 112.4 (Cq), 54.8 (CH), 54.2 (CH), 50.8 (Cq), 44.0 (Cq), 36.7 (CH<sub>2</sub>), 27.6 (3CH<sub>3</sub>) ; **IR** ( $\nu$ , cm<sup>-1</sup>) 3374, 2965, 1732, 1650, 1532, 1494, 1454, 1363, 1263, 1219,

1028 ; **HRMS** (EI) Calcd. for C<sub>25</sub>H<sub>25</sub>N<sub>3</sub>O : 383.1998 found : 383.1999

**N-(4-Chloro-benzyl)-2-(2,2-dicyano-3,5-diphenyl-cyclopent-3-enyl)-acetamide (7d)**

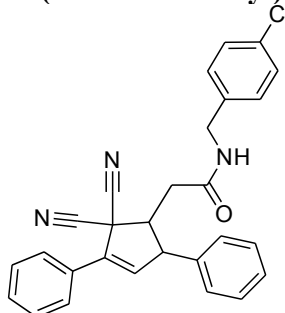

A mixture of Passerini adduct **1d** (100 mg, 1 eq), malonitrile derivative **6** (1 eq), cesium carbonate (1.2 eq) and tetrakis(triphenylphosphine)palladium (0.05 eq) in 1.3 mL of toluene was stirred at 50°C during 30min. The crude was purified by silica gel column chromatography with a gradient of AcOEt in EP (20:80 to 40:60), to afford 69mg of green solid (62% yield). **CCM** Rf (40/60 AcOEt/EP) = 0.59 ; **Mp** 153 – 155°C ; **<sup>1</sup>H-NMR** ( $\delta$ , ppm) (CDCl<sub>3</sub>, 400 MHz) 7.65 (d, J=7.6 Hz, 2H), 7.45 (m, 4H), 7.39 (m, 4H), 7.29 (d, J=8.4Hz, 2H), 7.20 (d, J=8.4 Hz, 2H), 6.42 (s, 1H), 5.90 (br s, 1H), 4.40 (d, J=5.6 Hz, 2H), 3.89 (dd, J=9.2, 2.0 Hz, 1H), 3.49 (dt, J=9.2, 5.2 Hz, 2H), 2.80 (dq, J=15.2, 9.6Hz, 2H) ; **<sup>13</sup>C-NMR** ( $\delta$ , ppm) (CDCl<sub>3</sub>, 100.6 MHz) 168.5 (Cq), 139.0 (Cq), 137.8 (Cq), 136.5 (CH), 136.3 (Cq), 133.4 (Cq), 130.8 (Cq), 129.7 (CH), 129.4 (2CH), 129.3 (2CH), 129.1 (2CH), 128.9 (2CH), 128.3 (CH), 128.0 (2CH), 126.4 (2CH), 114.6 (Cq), 113.3 (Cq), 55.7 (CH), 55.2 (CH), 45.3 (Cq), 43.1 (CH<sub>2</sub>), 36.5 (CH<sub>2</sub>) ; **IR** ( $\nu$ , cm<sup>-1</sup>) 3292, 3058, 2925, 1741, 1650, 1539, 1491, 1445, 1263, 1226, 1090, 1014 ; **HRMS** (EI) Calcd. for C<sub>28</sub>H<sub>22</sub>ClN<sub>3</sub>O : 451.1451 found : 451.1459

**7,7-Dicyano-4,6-diphenyl-hepta-2,6-dienoic acid tert-butylamide (8c)**

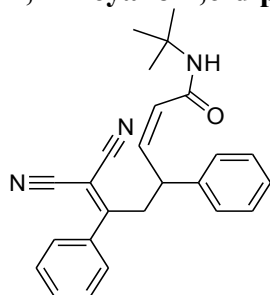

A mixture of Passerini adduct **1c** (100 mg, 1 eq), malonitrile derivative **6** (1 eq), cesium carbonate (1.2 eq) and tetrakis(triphenylphosphine)palladium (0.05 eq) in 1.3 mL of toluene was stirred at 50°C during 30min. The crude was purified by silica gel column chromatography with a gradient of Et<sub>2</sub>O in EP (20:80 to 50:50), to afford 82 mg of yellow solid (59% yield). **CCM** Rf (70/30 Et<sub>2</sub>O/EP) = 0.32 **Mp** 75 – 77°C ; **<sup>1</sup>H-NMR** ( $\delta$ , ppm) (CDCl<sub>3</sub>, 400 MHz) 7.54 (d, J=7.2 Hz, 1H), 7.48 (t, J=6.8 Hz, 2H), 7.29 (m, 5H), 6.99 (d, J=7.6 Hz, 2H), 6.84 (dd, J=15.2, 6.0 Hz, 1H), 5.54 (d, J=15.2 Hz, 1H), 5.23 (br s, 1H), 3.48 (dd, J=14.8, 11.2Hz, 1H), 3.40 (m, 2H), 1.35 (s, 9H) ; **<sup>13</sup>C-NMR** ( $\delta$ , ppm) (CDCl<sub>3</sub>, 100.6 MHz) 177.0 (Cq), 164.2 (Cq), 143.06 (CH), 138.6 (Cq), 134.3 (Cq), 132.2 (CH), 129.3 (2CH), 129.0 (2CH), 127.9 (2CH), 127.6 (2CH), 125.9 (CH), 112.5 (Cq), 112.4 (Cq), 86.5 (Cq), 51.5 (Cq), 46.8 (CH), 42.6 (CH<sub>2</sub>), 28.7 (3CH<sub>3</sub>) ; **IR** ( $\nu$ , cm<sup>-1</sup>) 3290, 2965, 2925, 2228, 1667, 1629, 1540, 1453, 1391, 1362, 1265, 1222, 1077 ; **HRMS** (EI) Calcd. for C<sub>25</sub>H<sub>25</sub>N<sub>3</sub>O : 383.1998 found : 383.1992

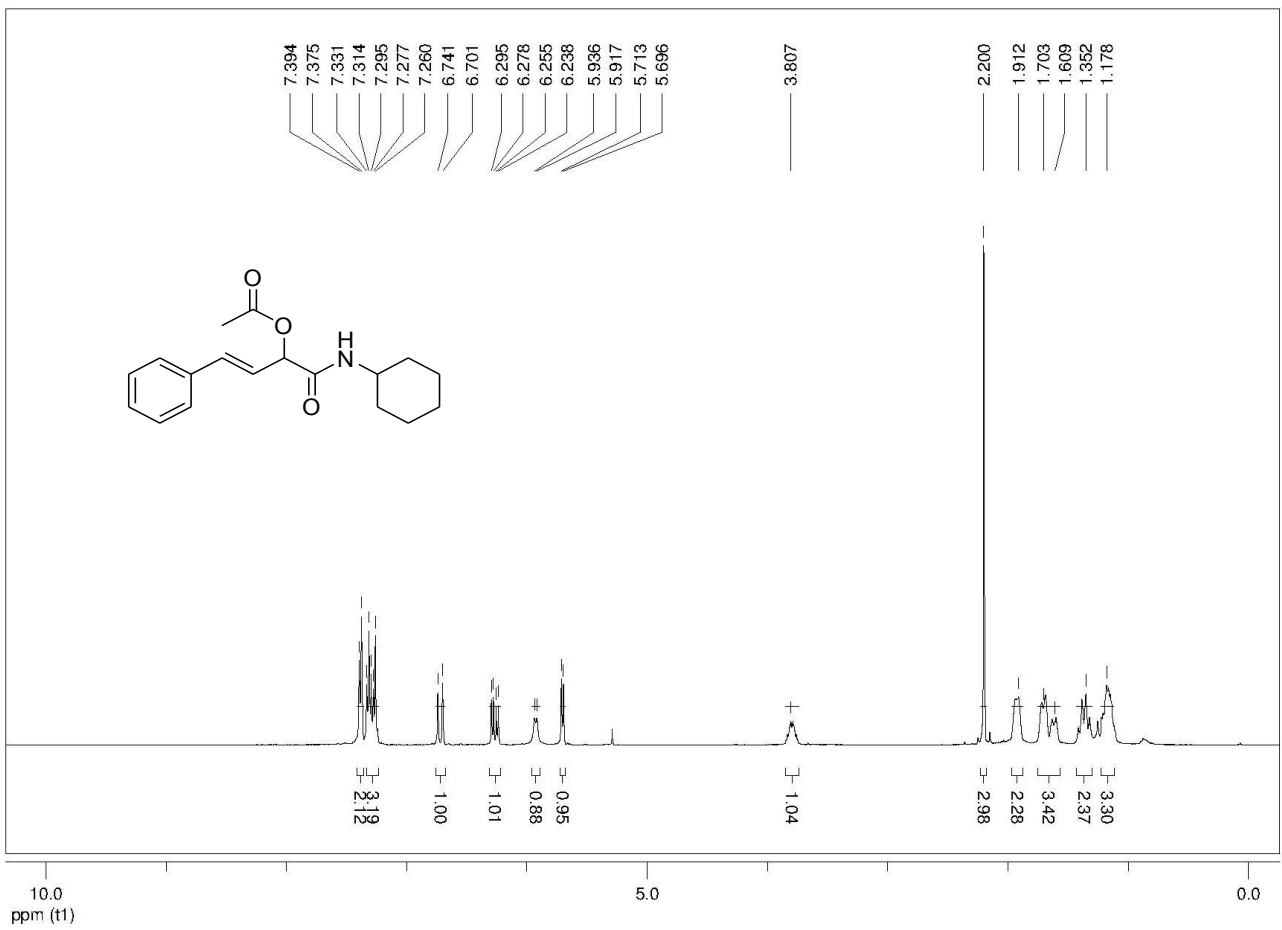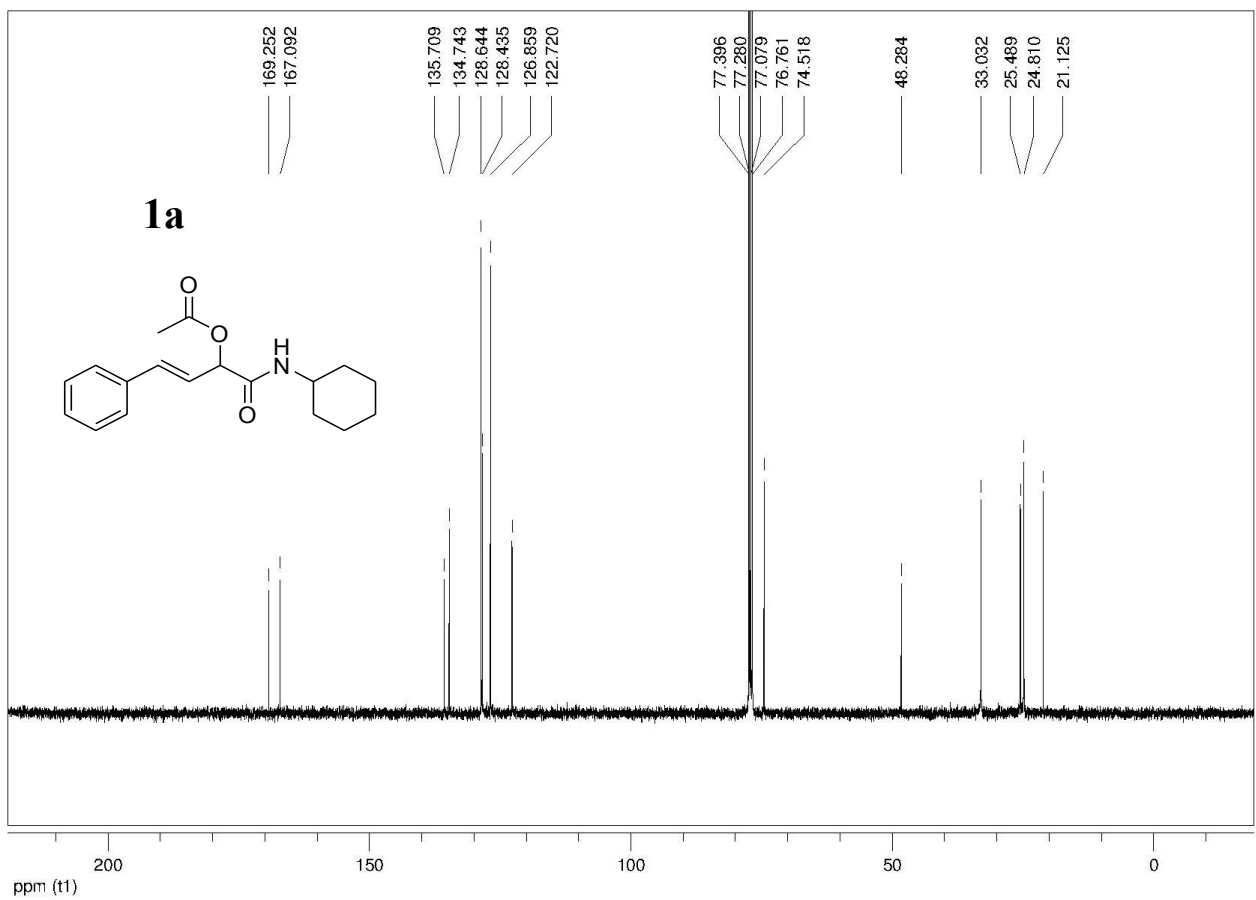



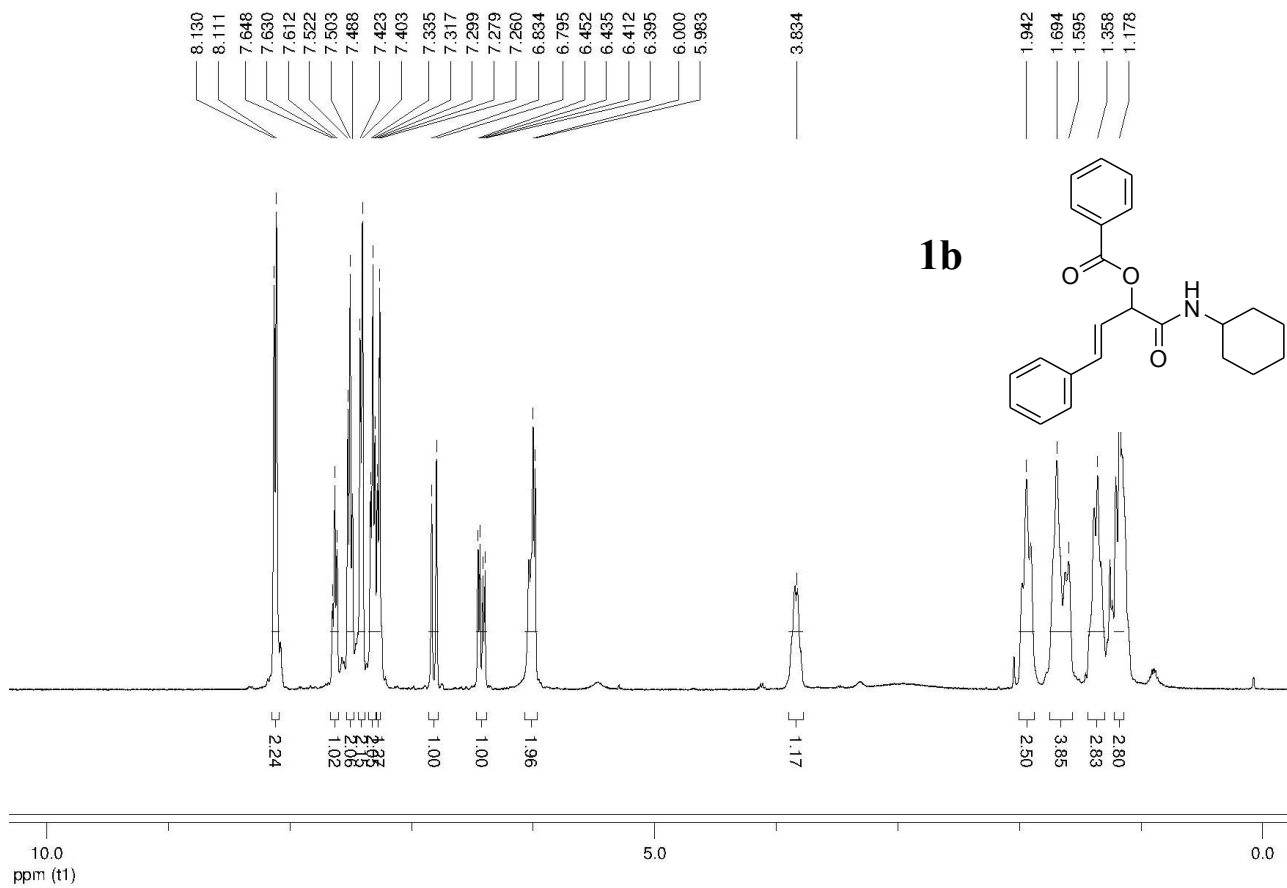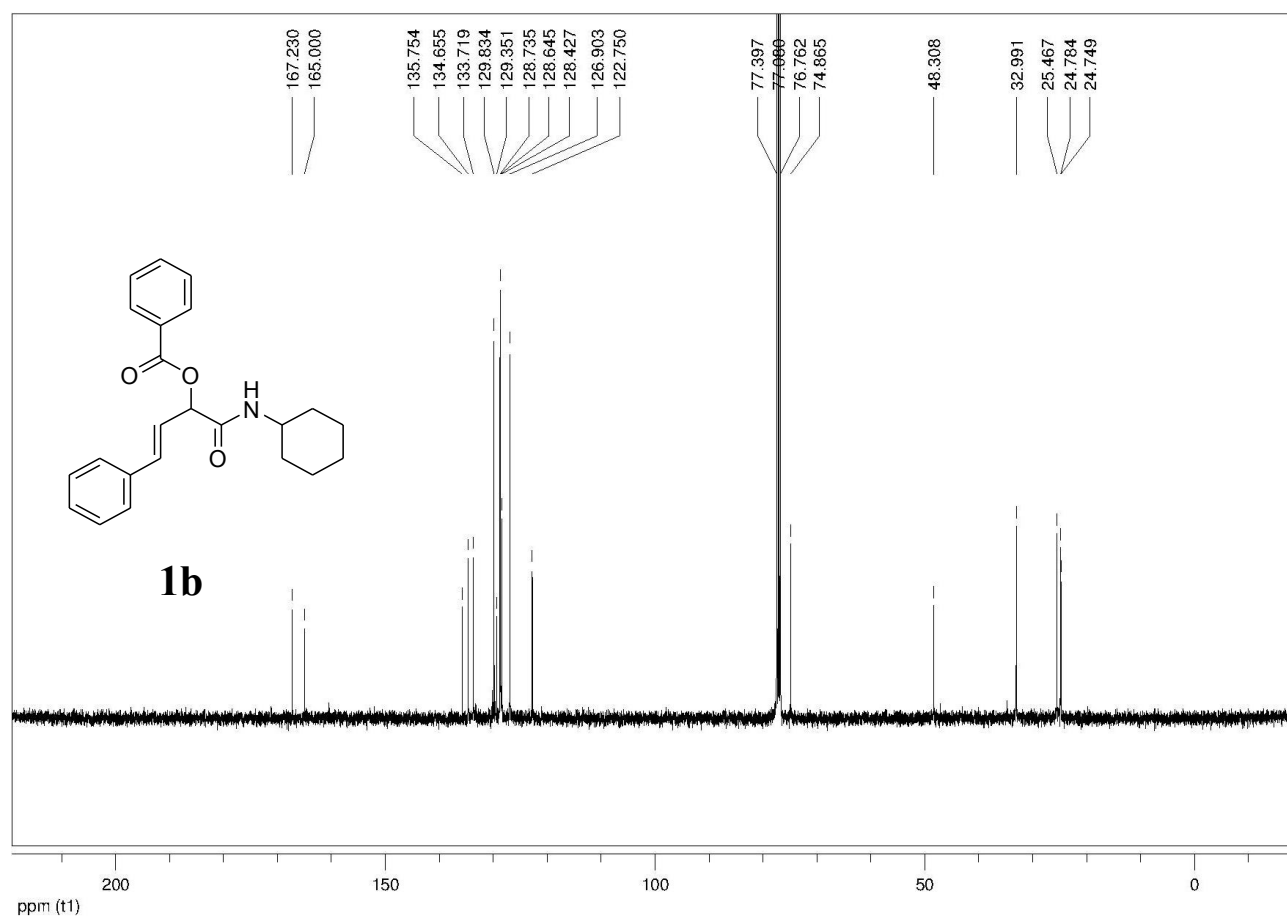

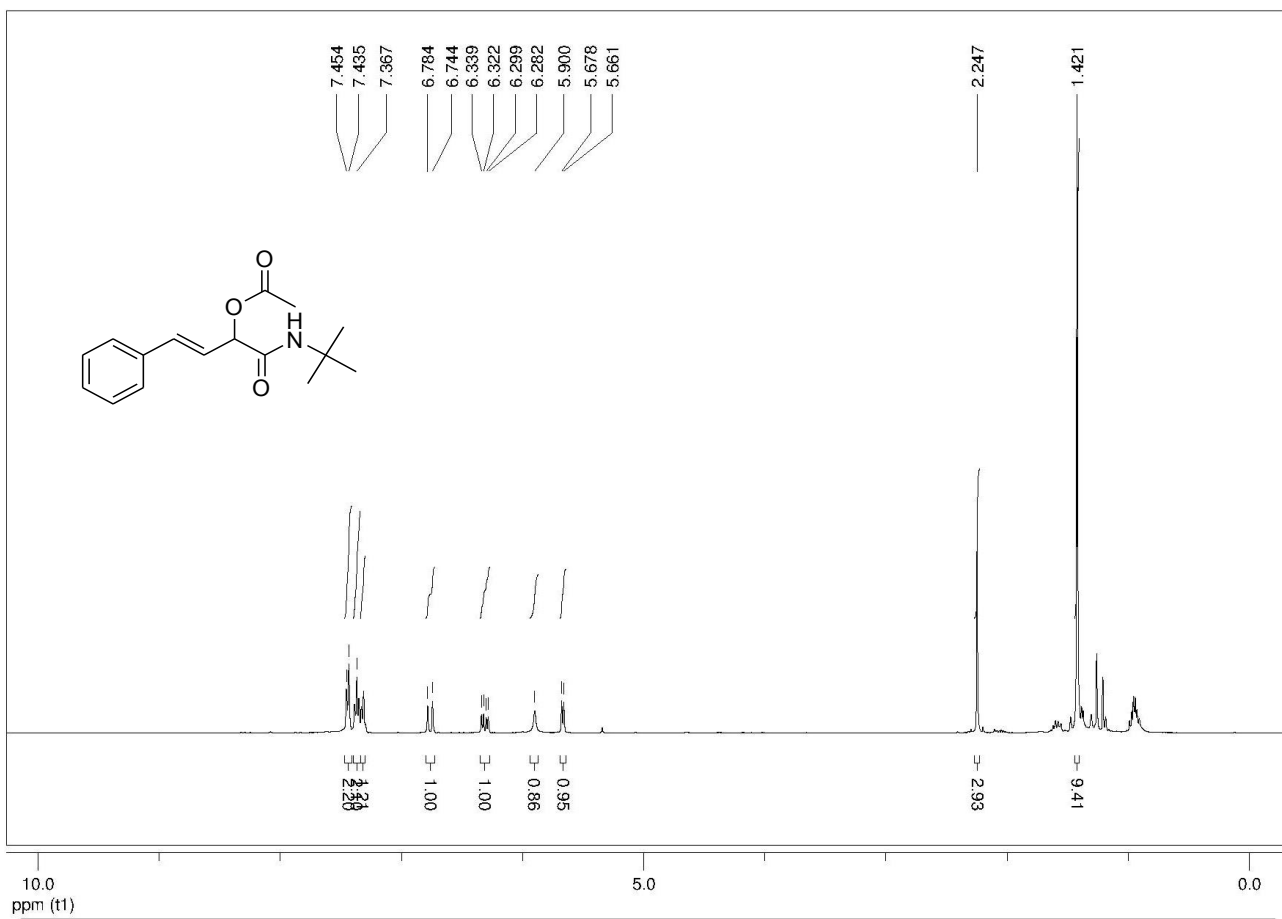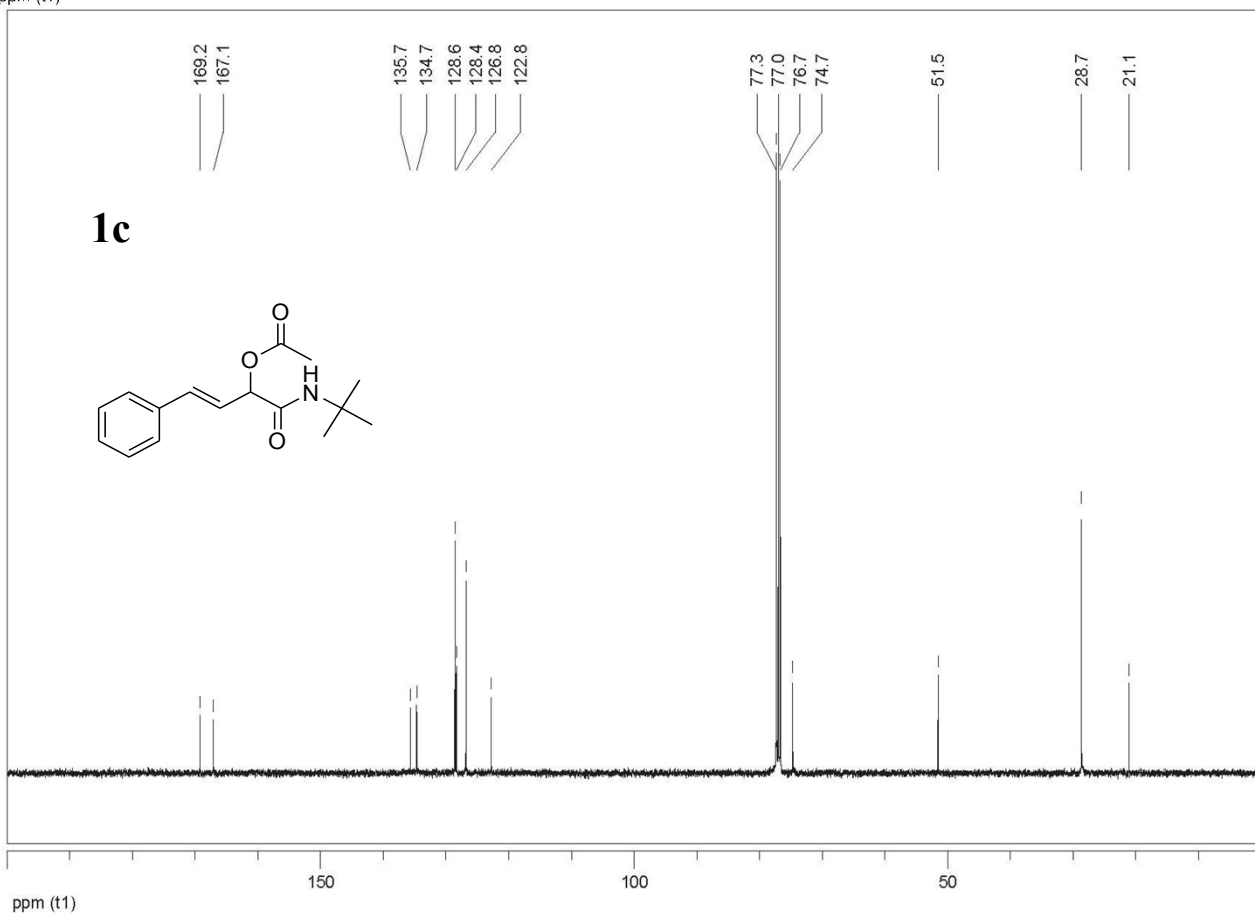

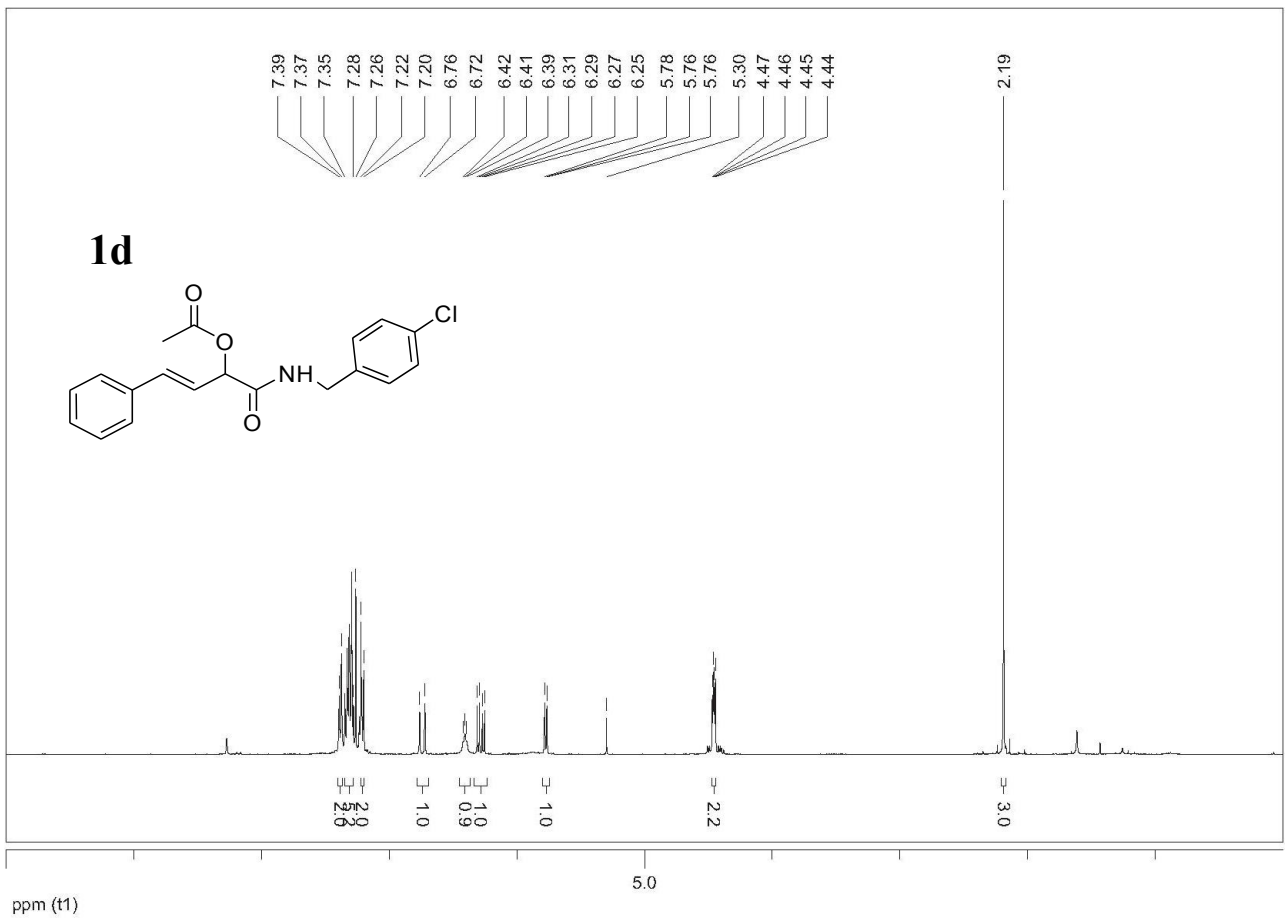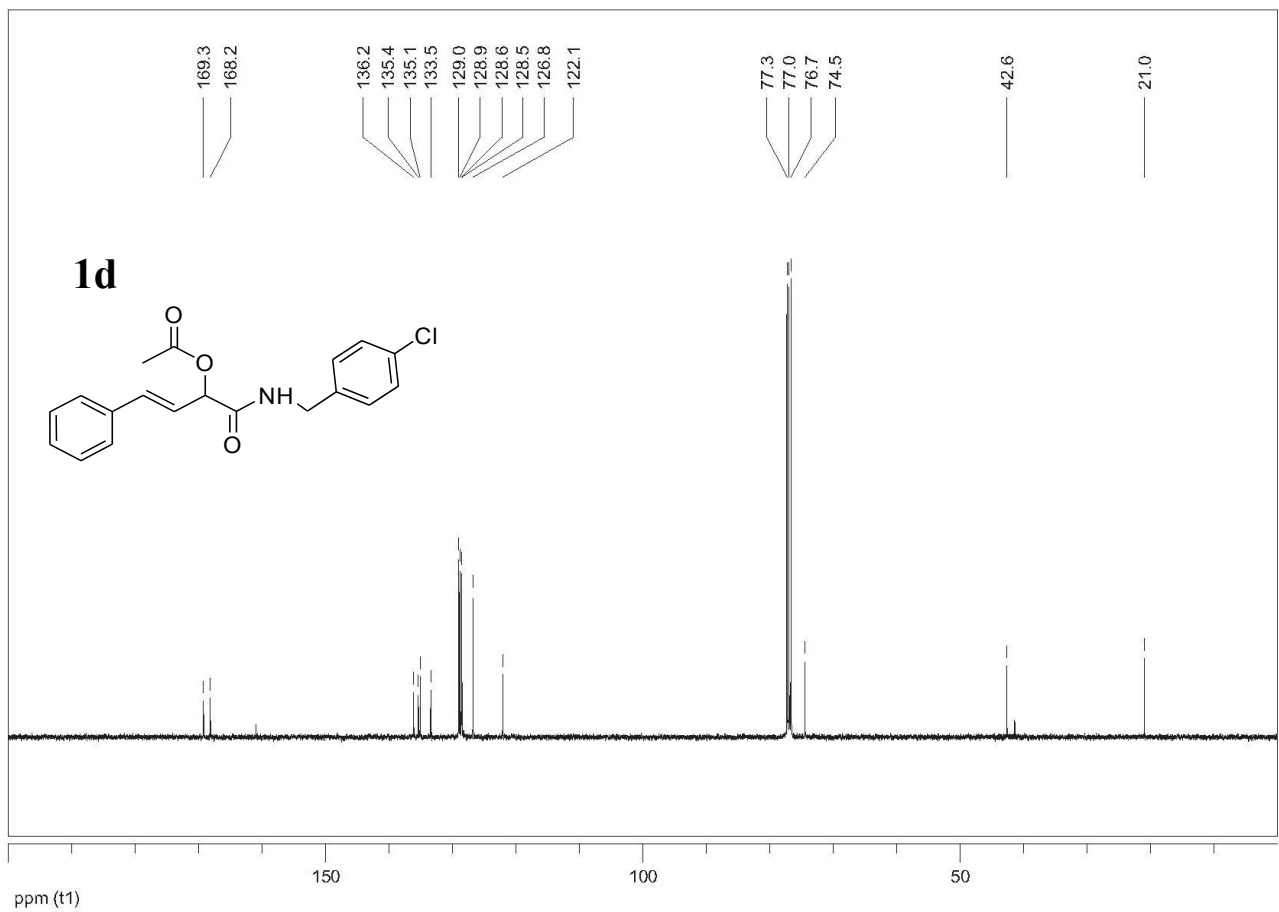



ads 2296

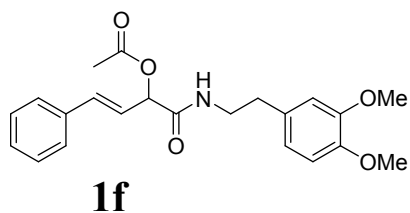

7.38  
7.28  
7.26  
6.76  
6.74  
6.71  
6.67  
6.26  
6.24  
6.22  
6.20  
6.05  
5.71  
5.71  
5.69  
5.69  
3.84  
3.83  
3.61  
3.47  
2.84  
2.73  
2.13

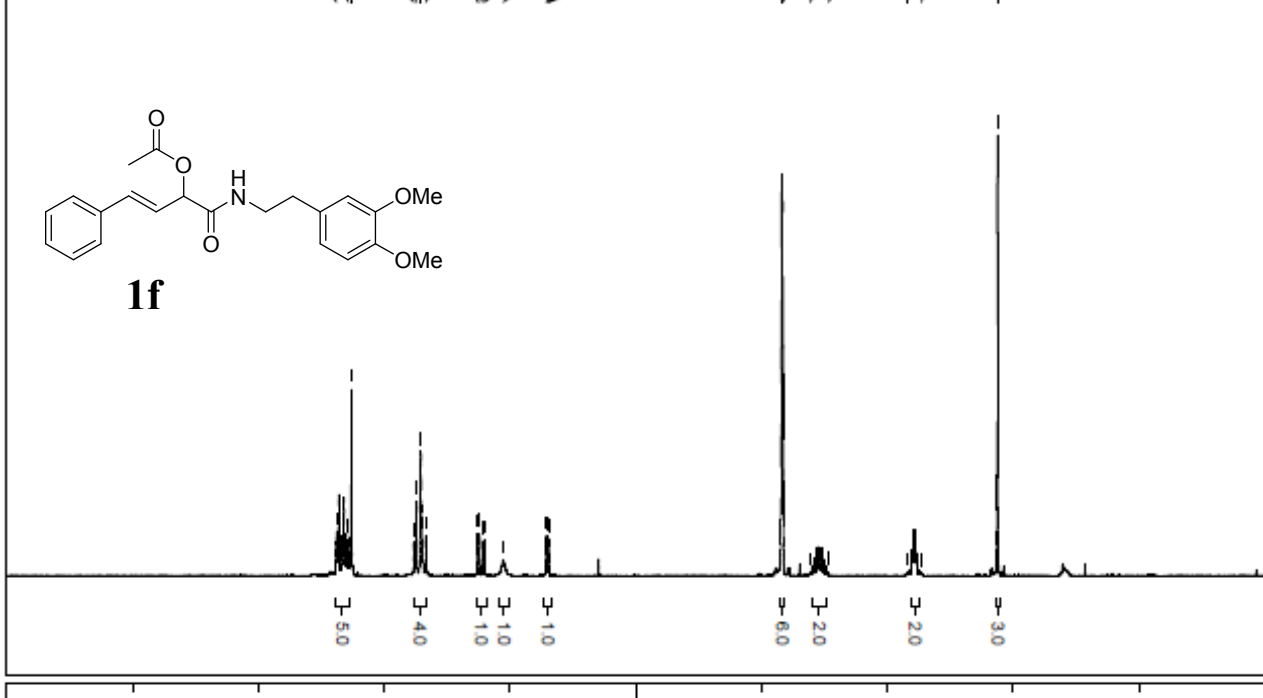

ppm (t1)

ads 2296

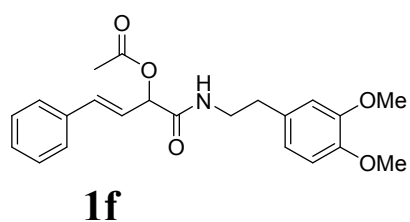

168.1  
168.0  
149.0  
147.7  
135.5  
134.7  
131.0  
128.6  
128.4  
126.8  
122.4  
120.7  
111.9  
111.2  
77.3  
77.3  
76.7  
74.4  
55.9  
55.8  
40.5  
35.0  
20.9

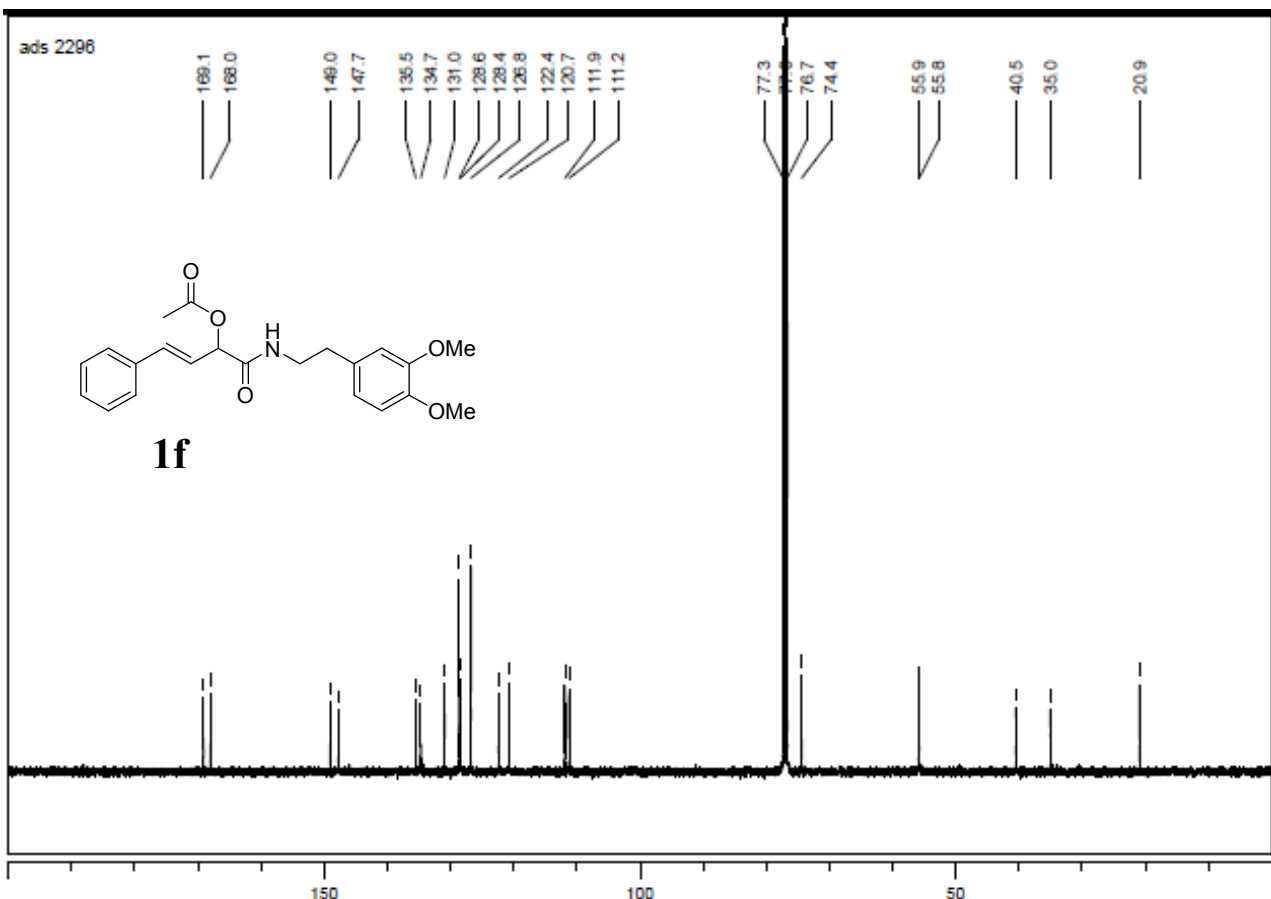

ppm (t1)

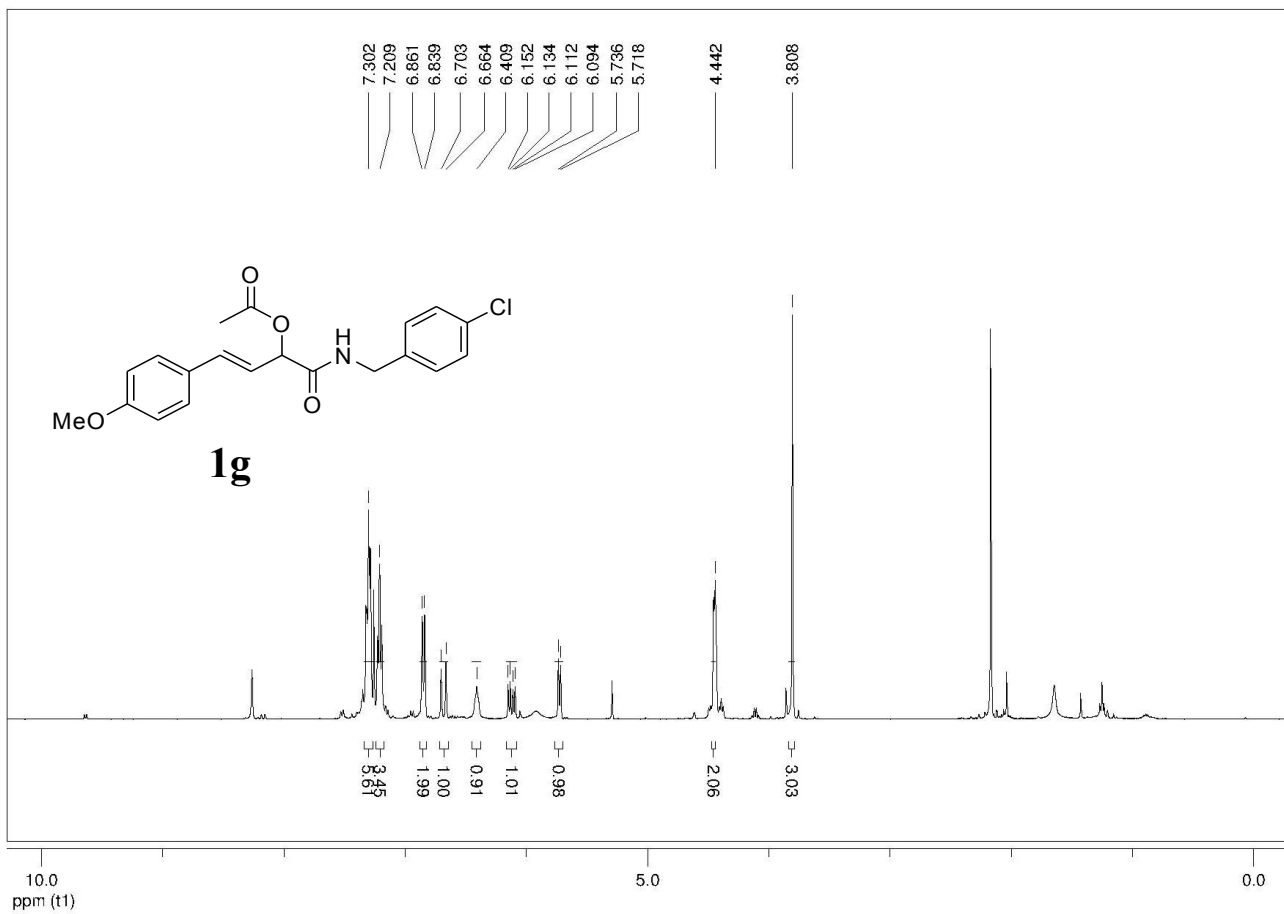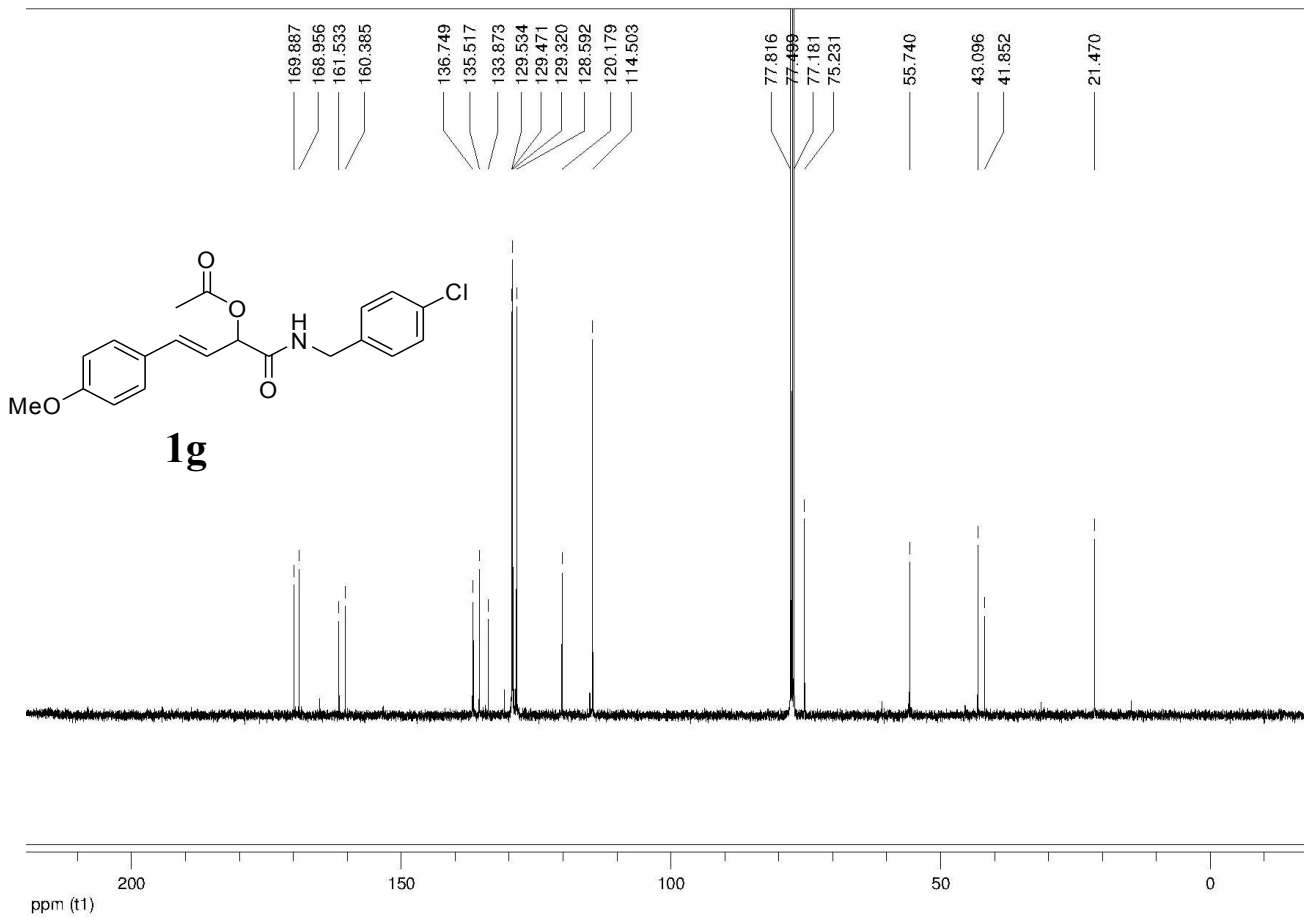

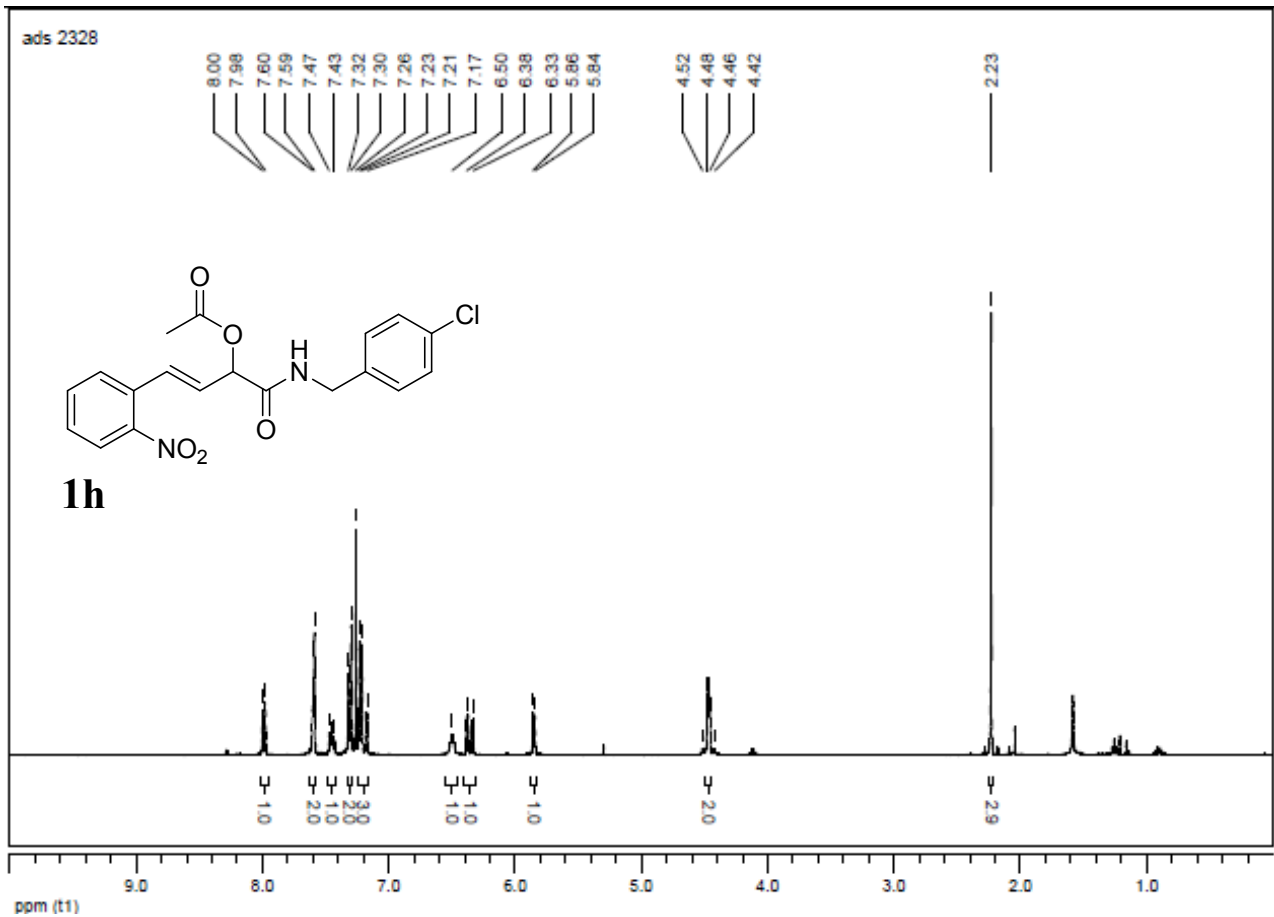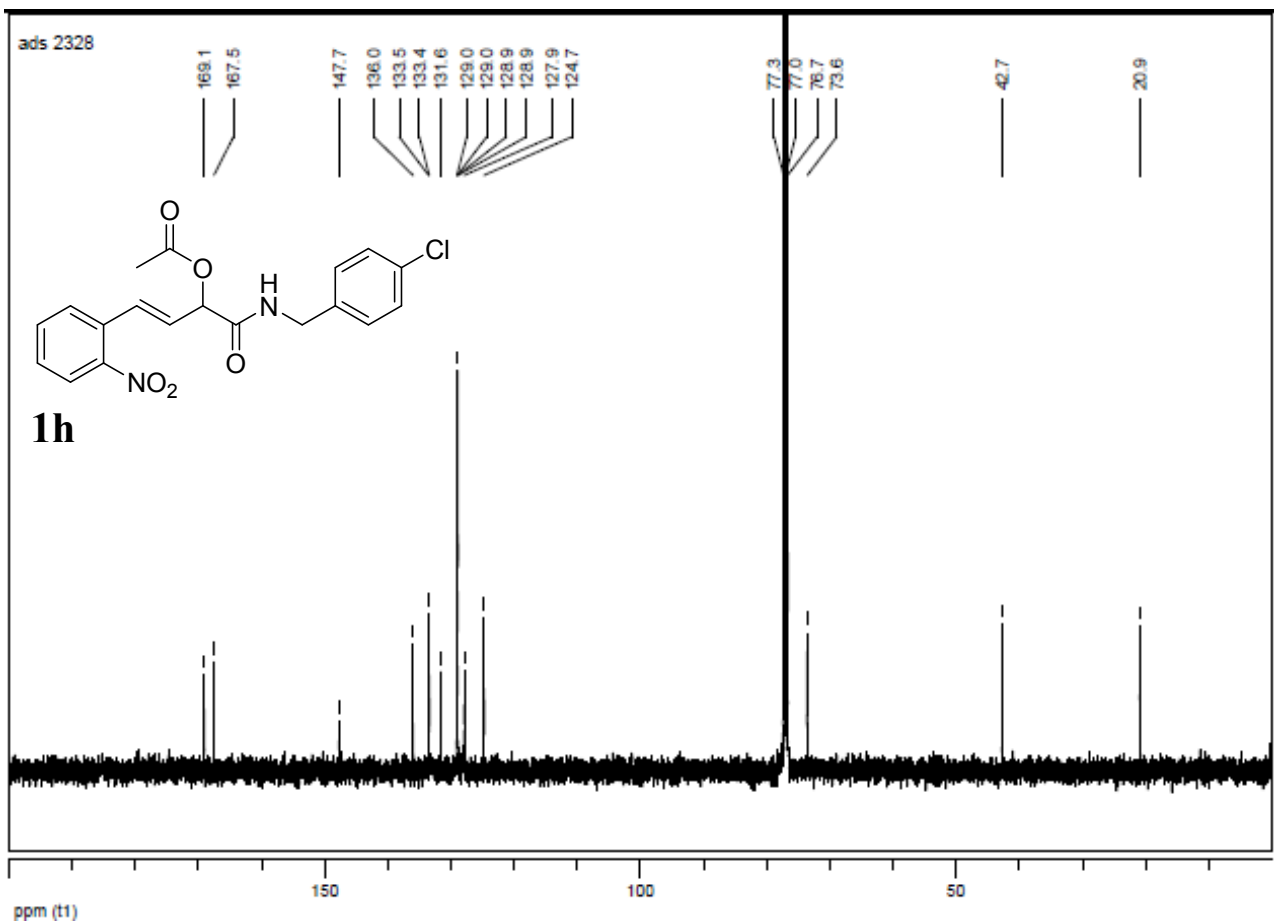

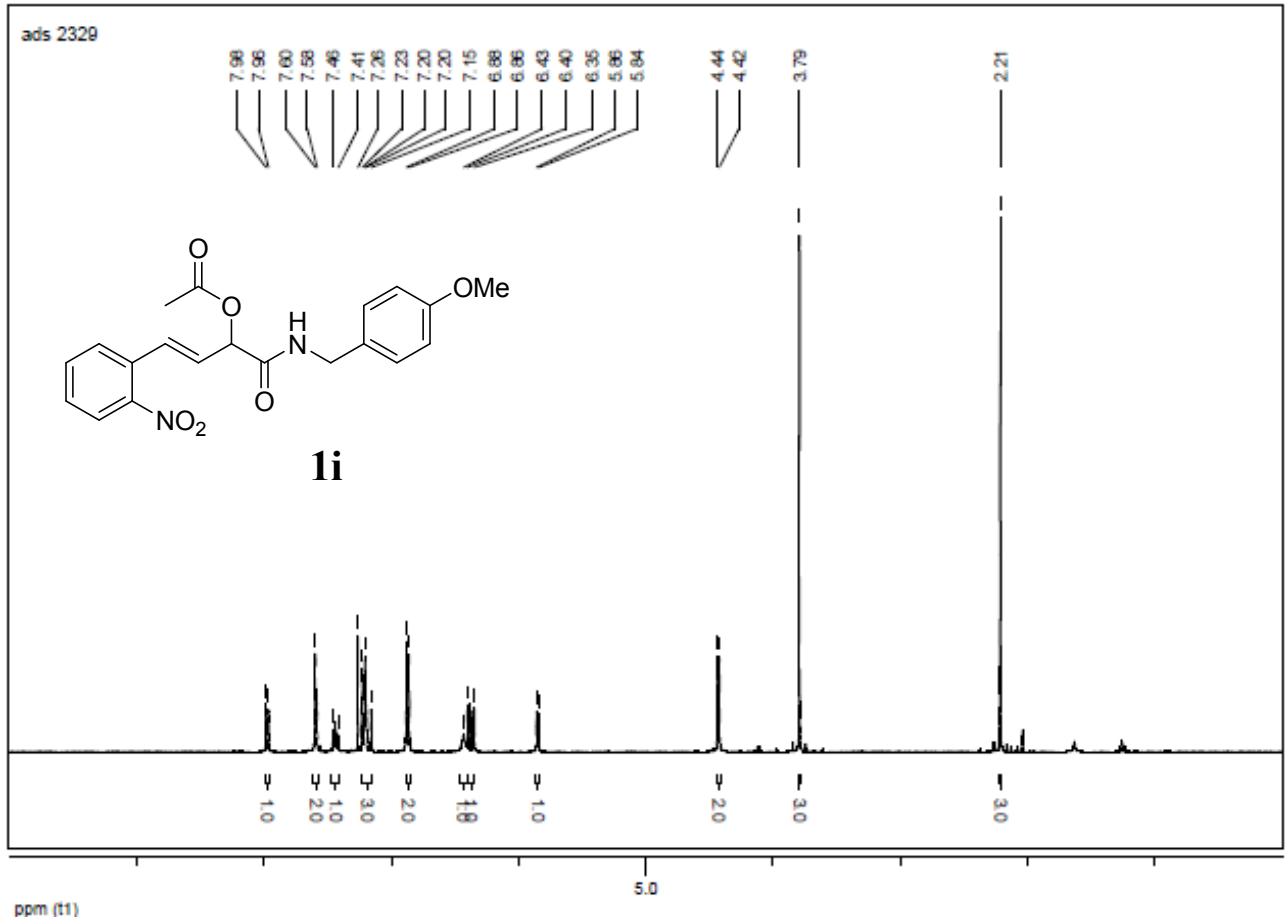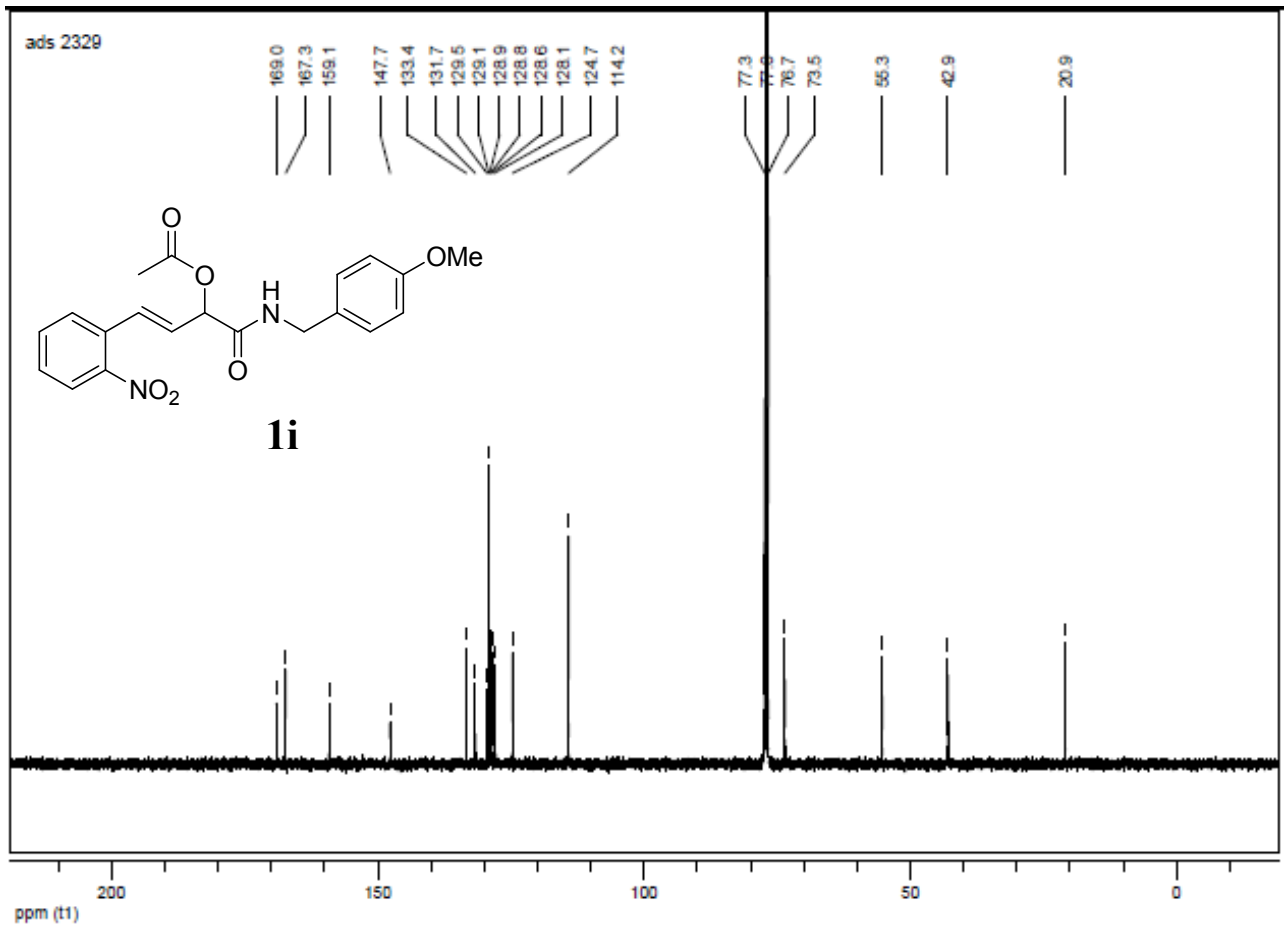



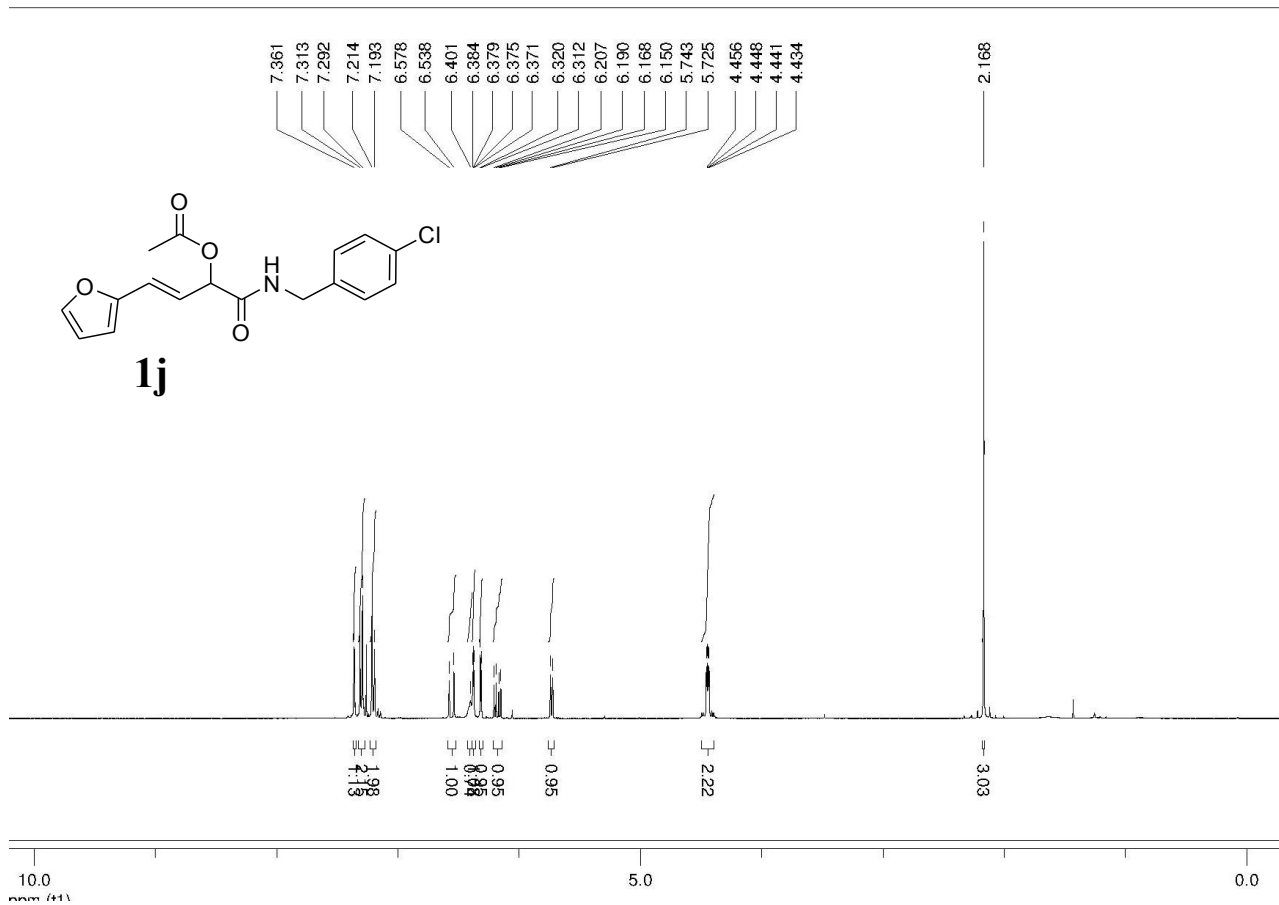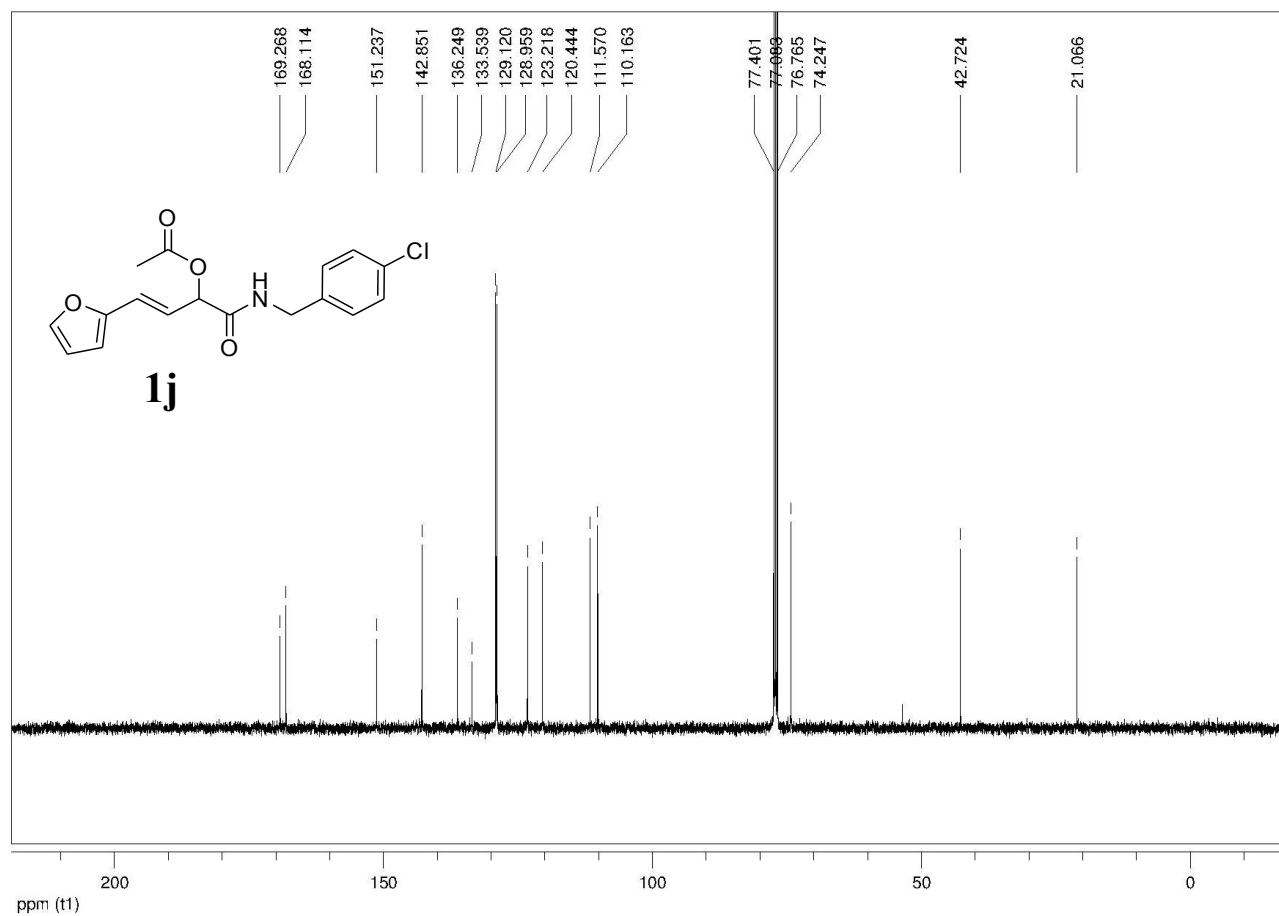

ads 2255

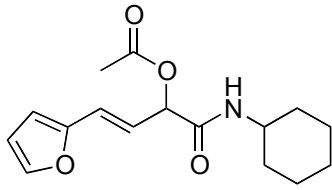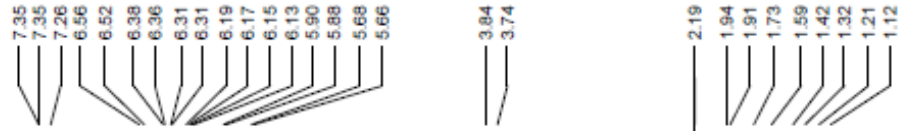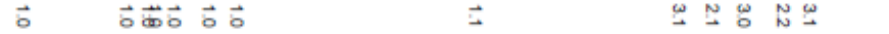

ppm (t1)

ads 2255

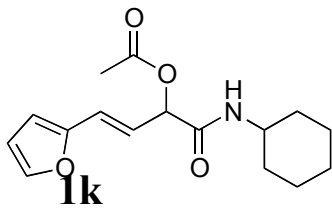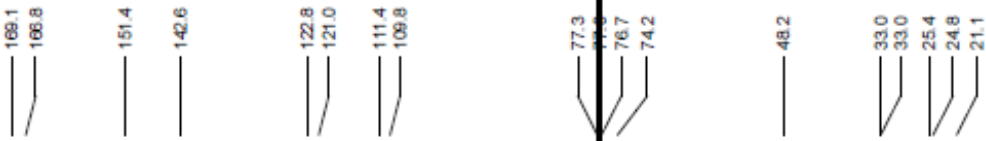

ppm (t1)

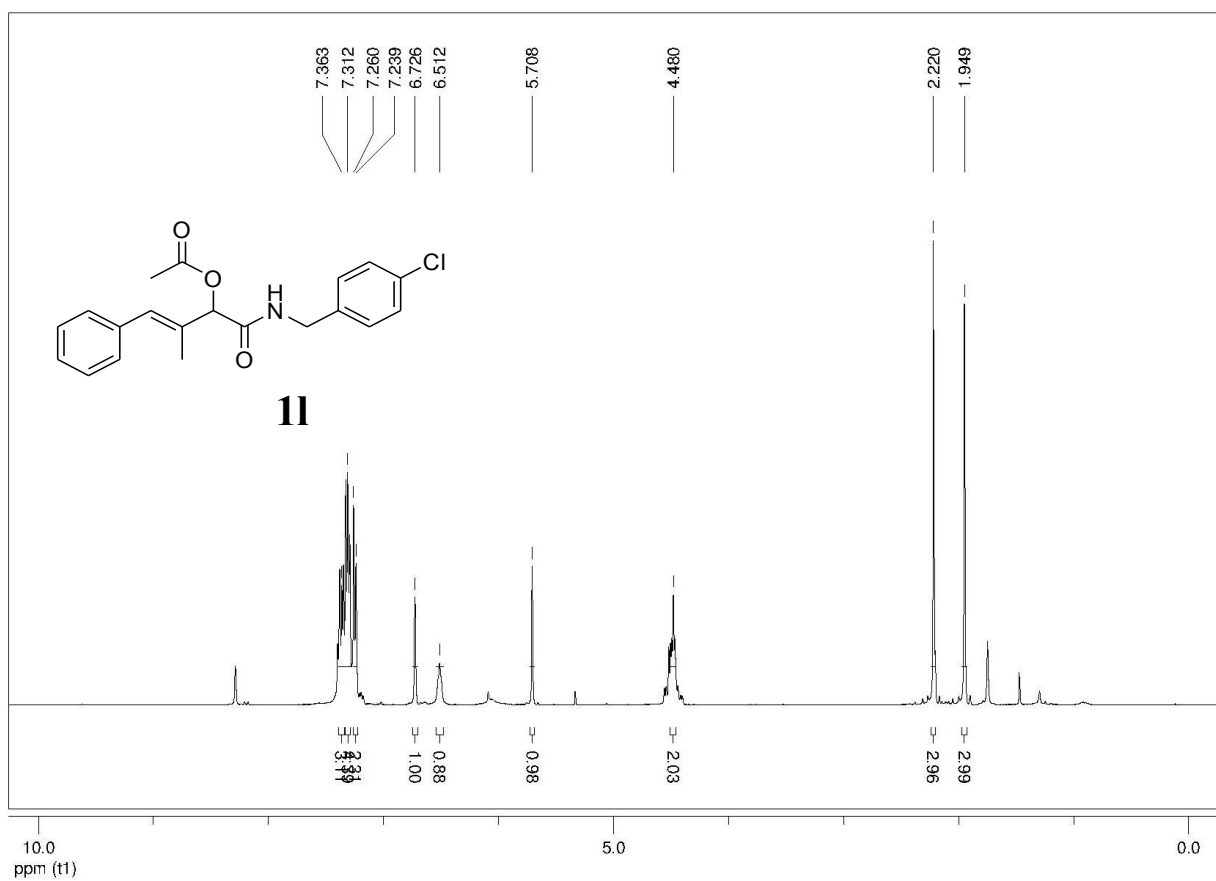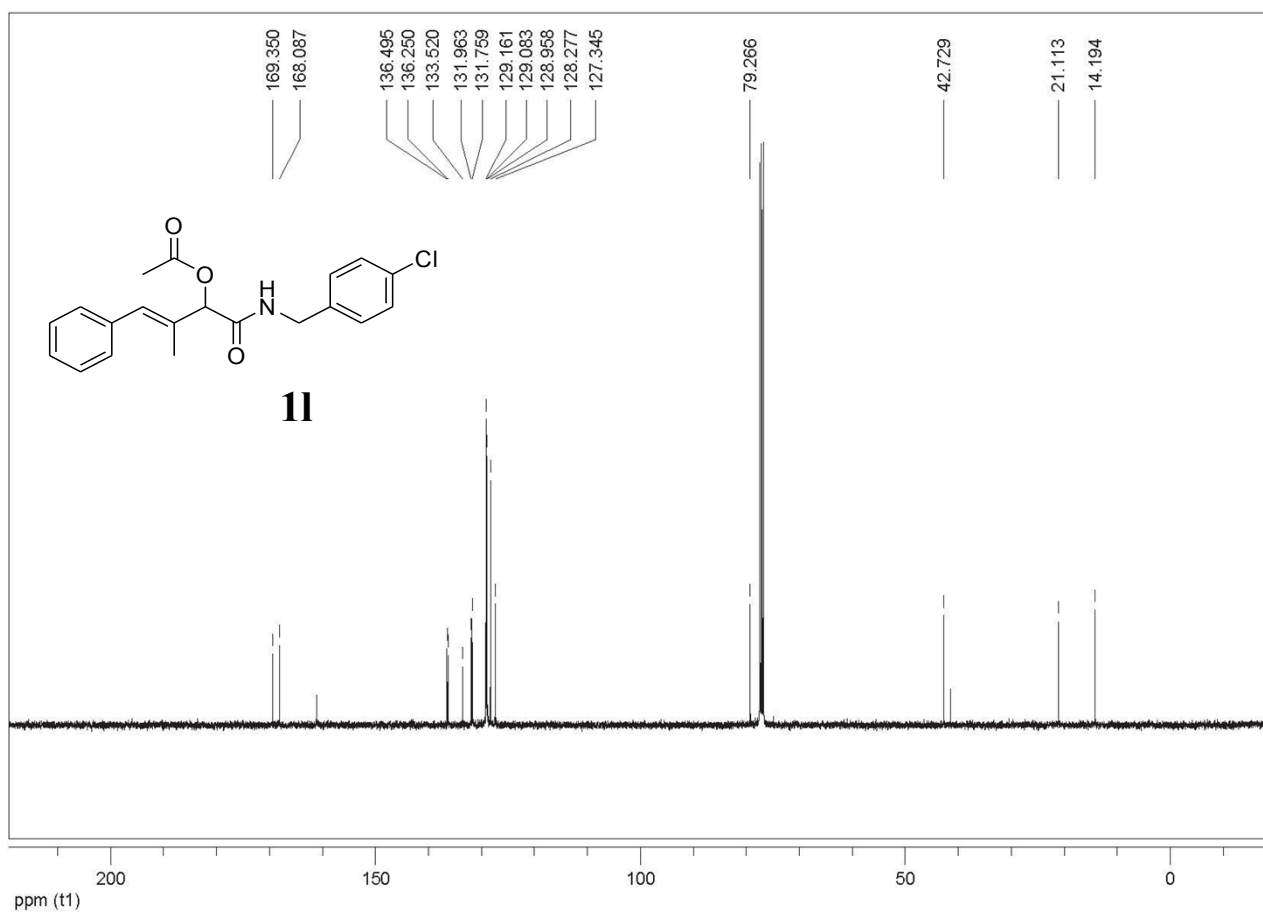

ads 2330

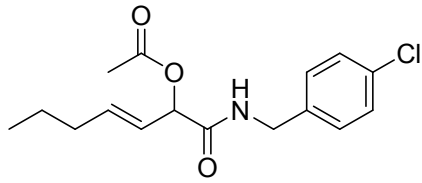

7.31  
7.29  
7.26  
7.20  
7.18

6.29  
5.93  
5.84  
5.59  
5.53

4.48  
4.44  
4.43  
4.38

2.14  
2.08  
2.03  
1.46  
1.36  
0.90  
0.87

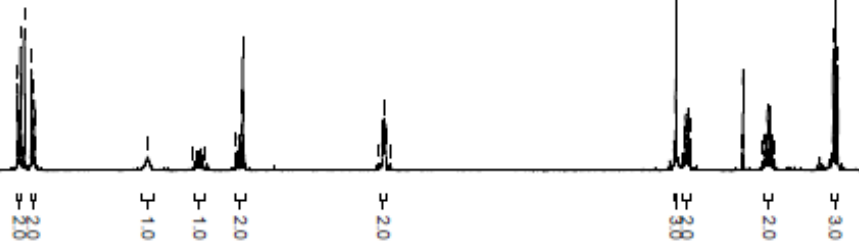

ppm (t1)

ads 2330

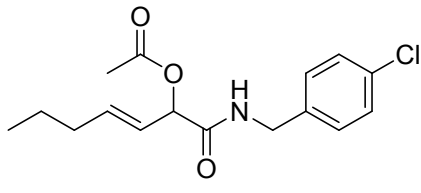

169.3  
168.6

137.7  
136.3  
133.4  
129.0  
128.9  
123.3

77.3  
77.0  
76.7  
74.7

42.5  
34.2  
21.8  
21.0  
13.6

ppm (t1)

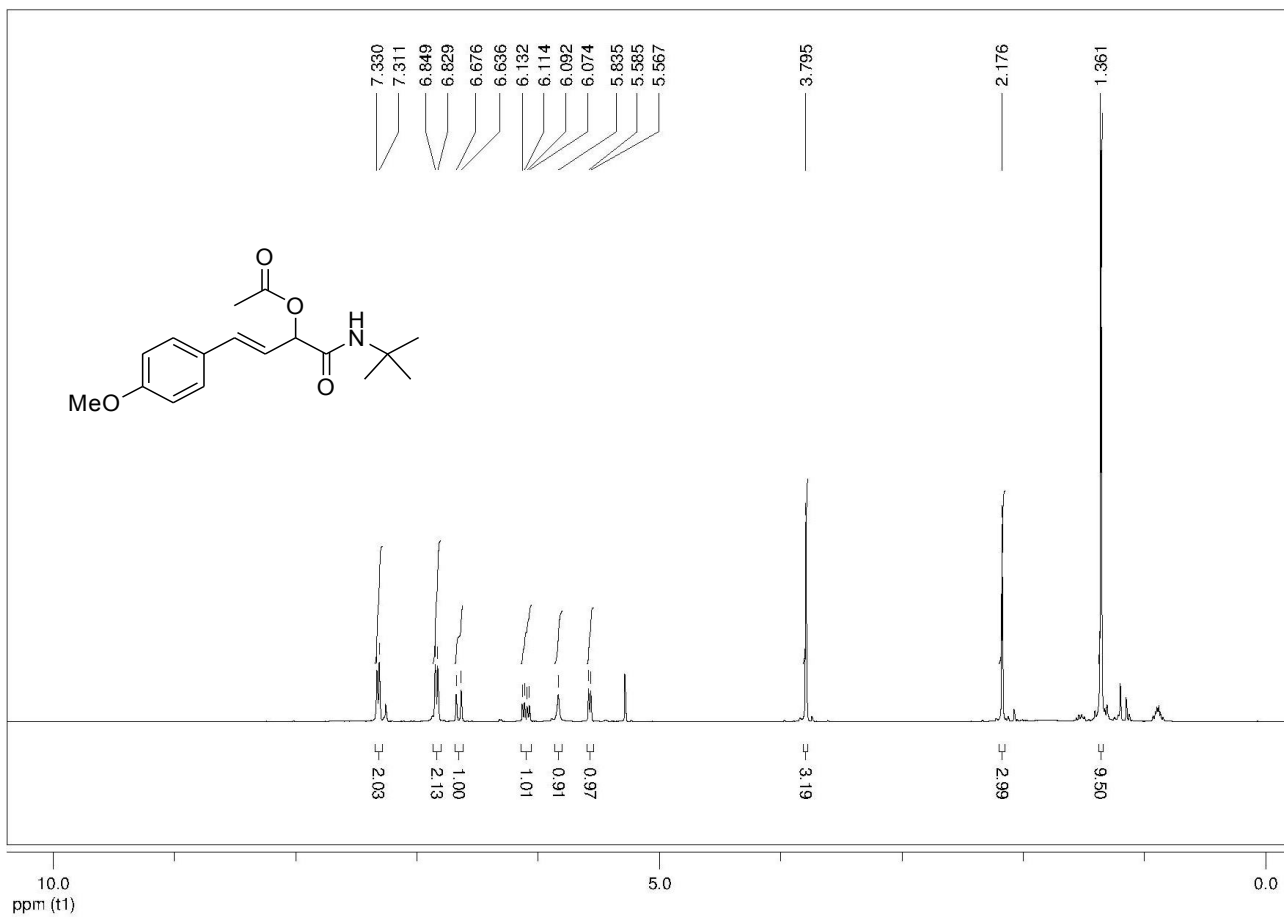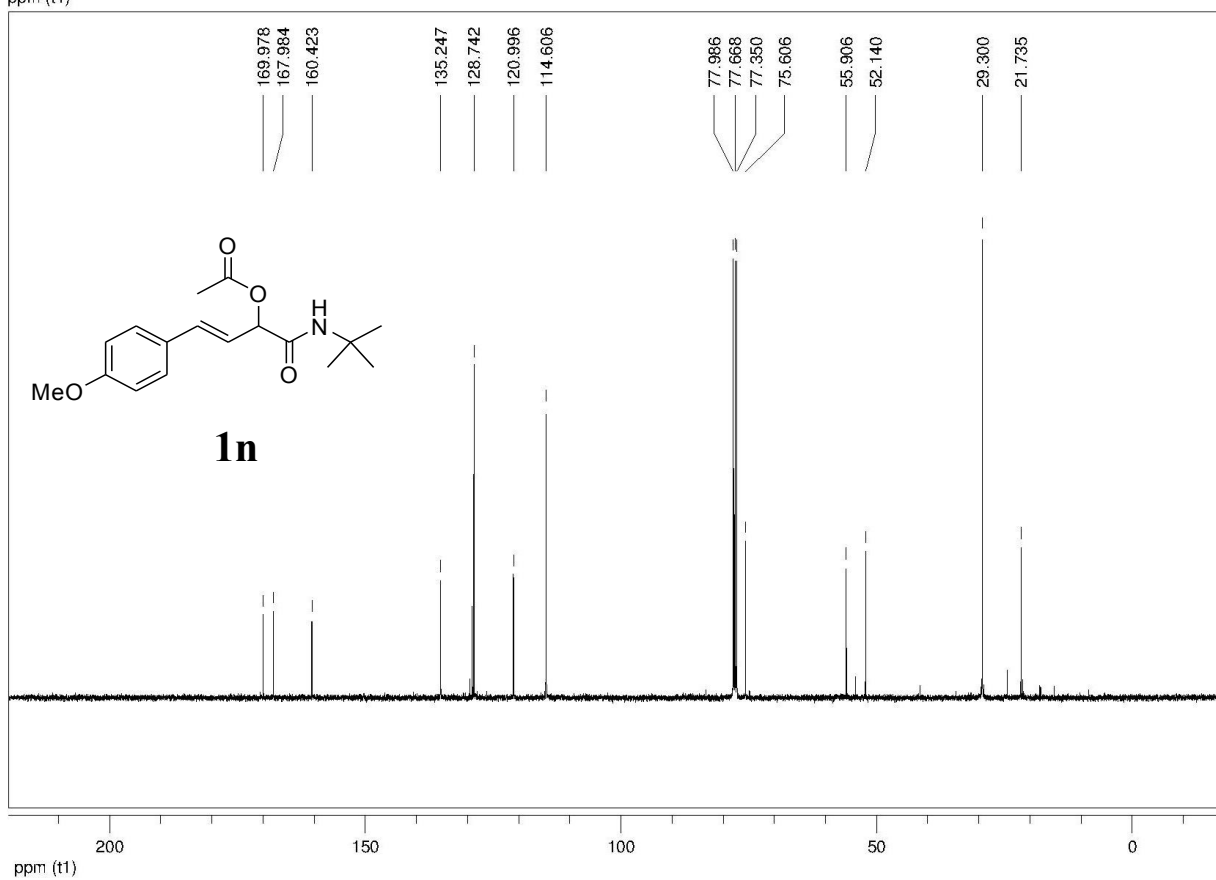

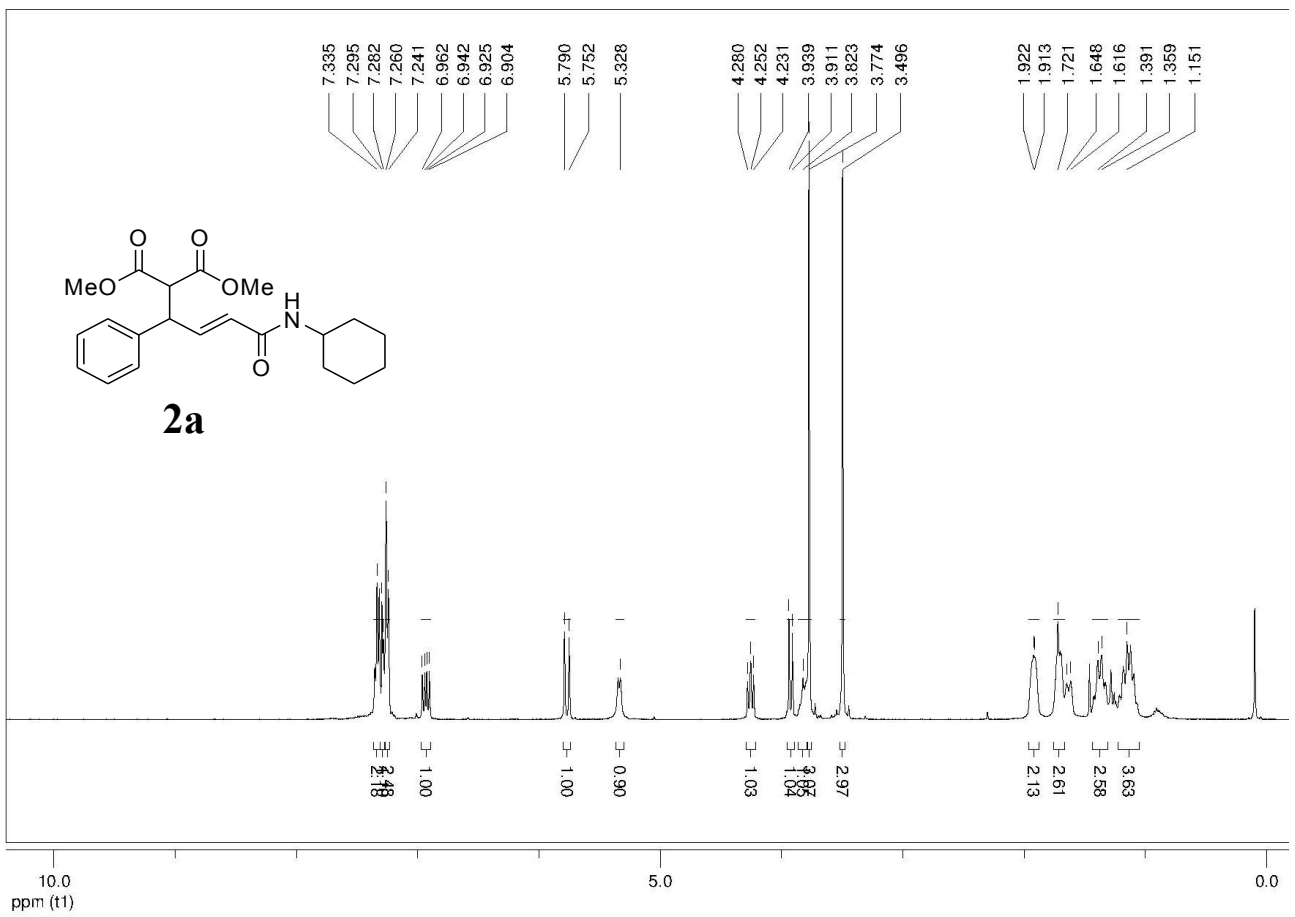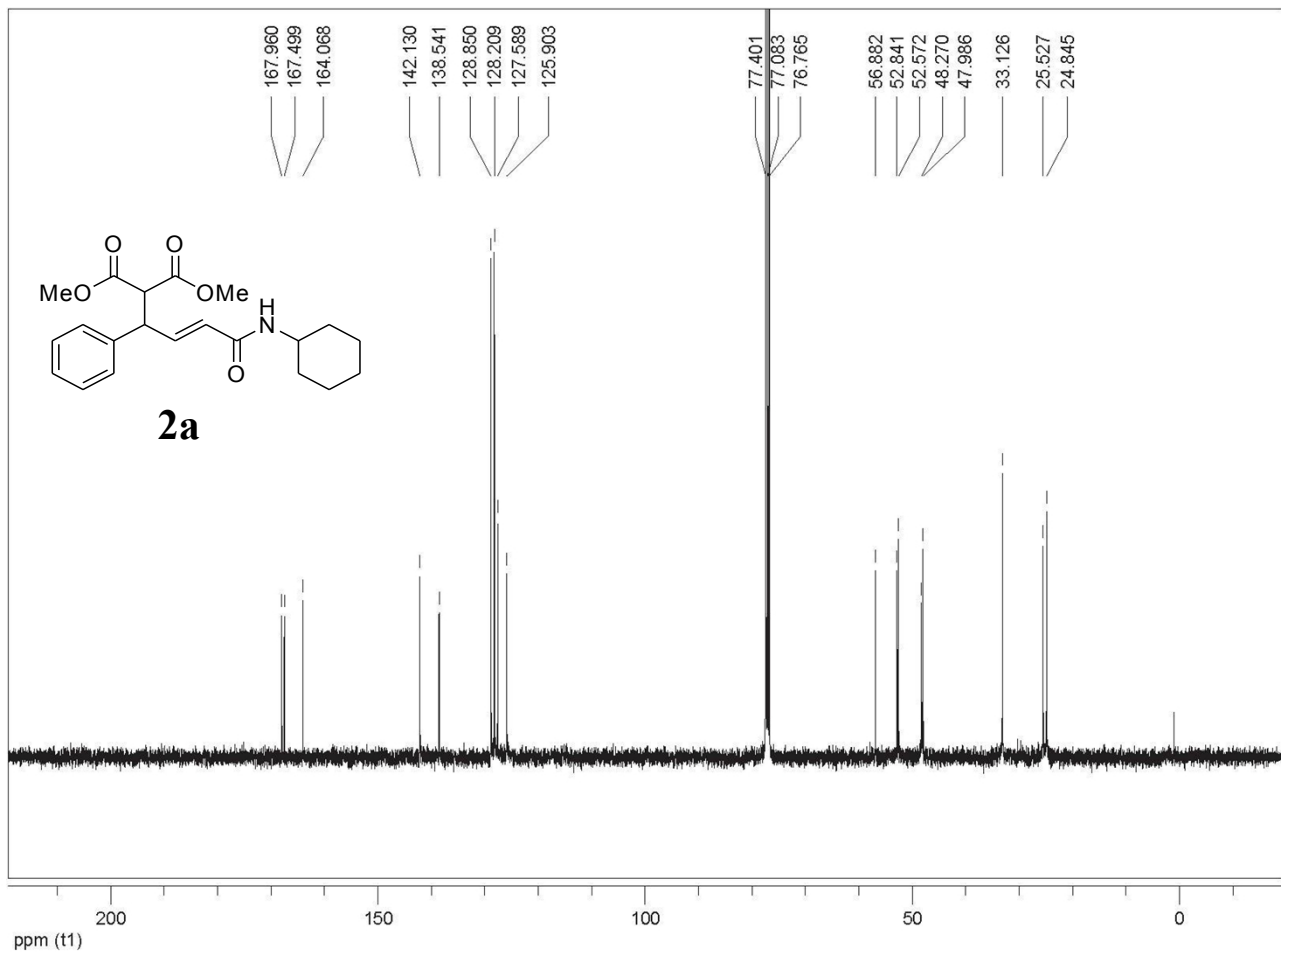

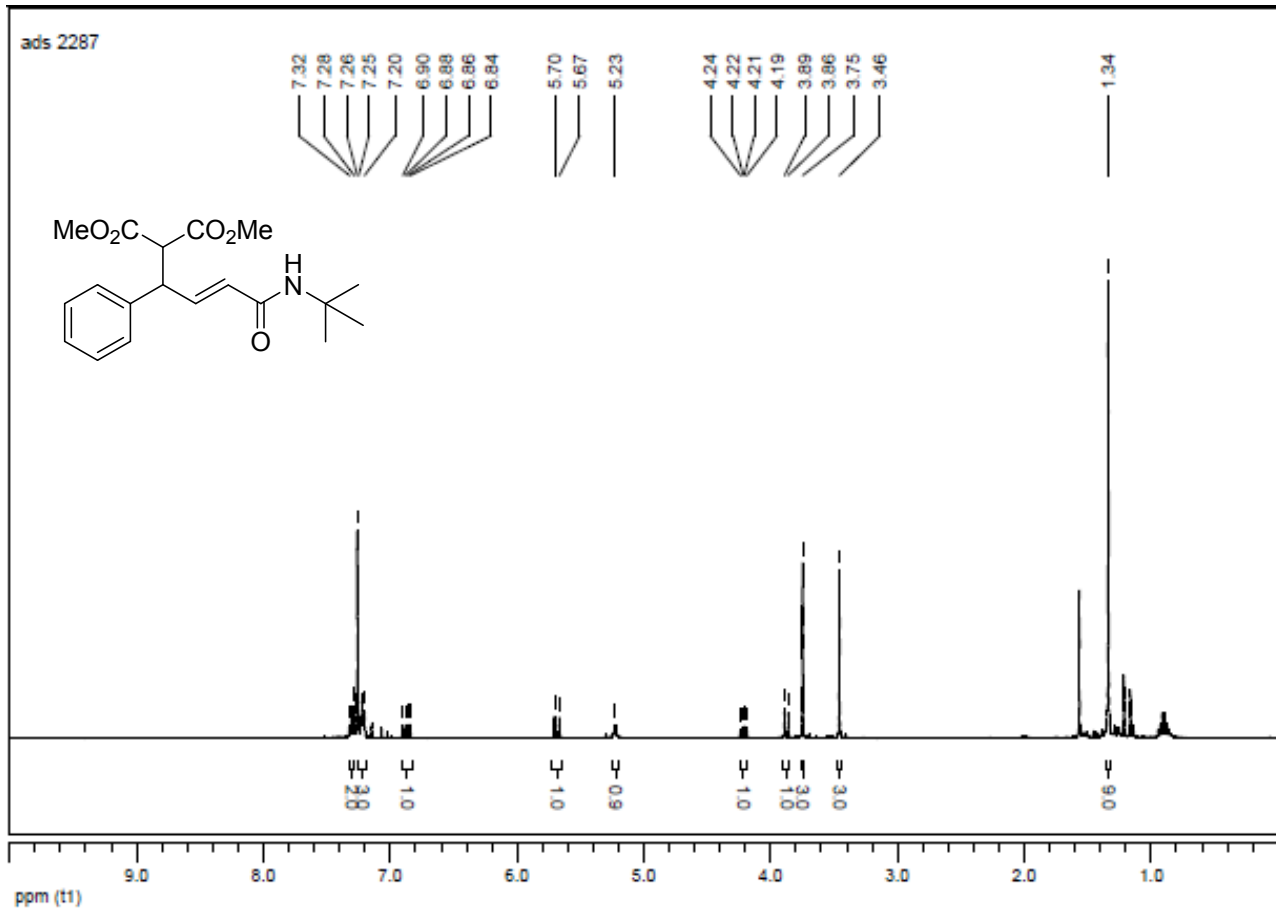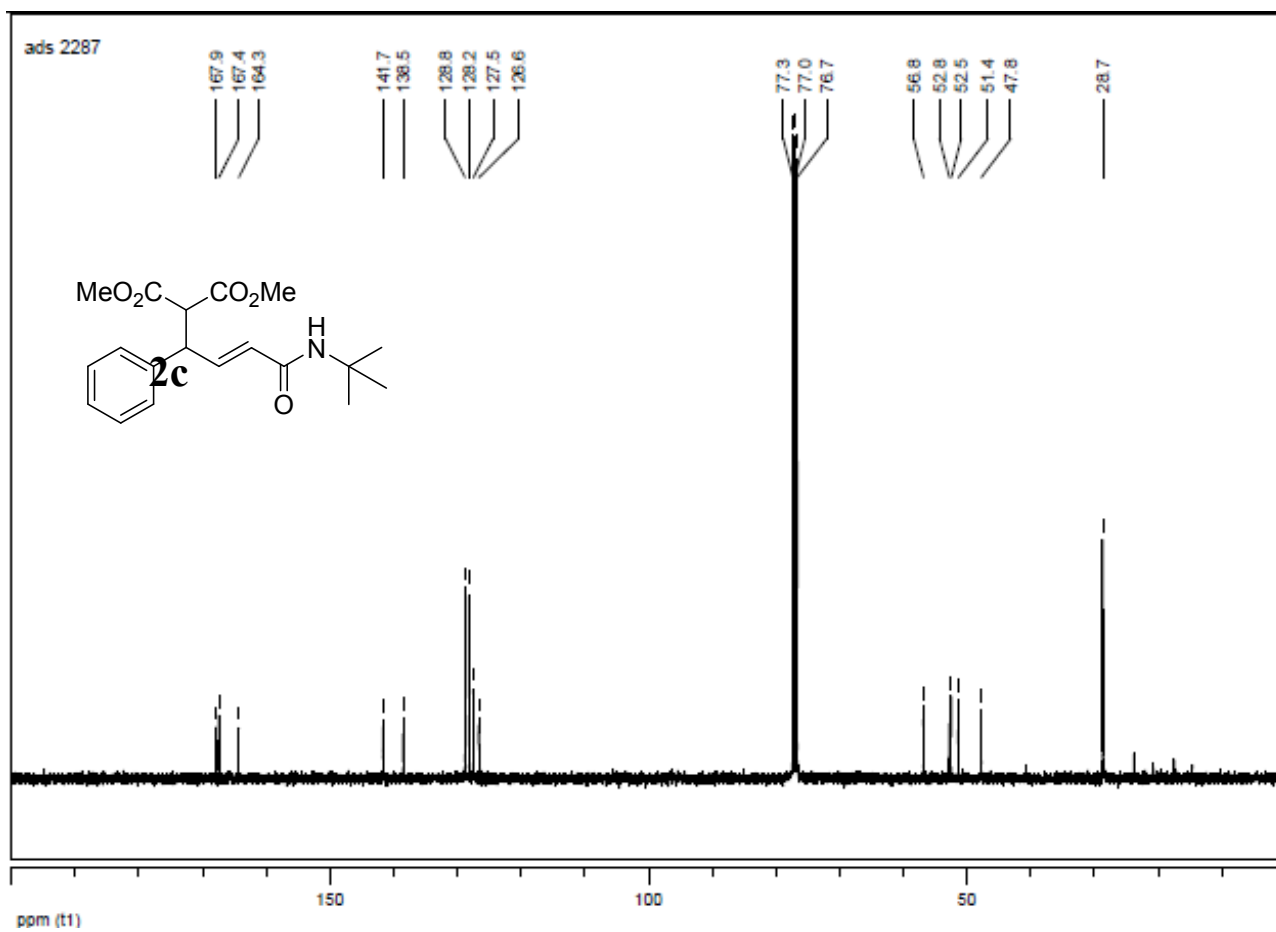

ads 2305

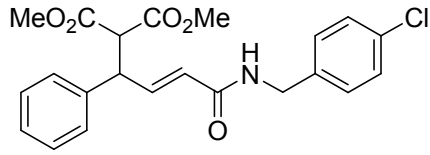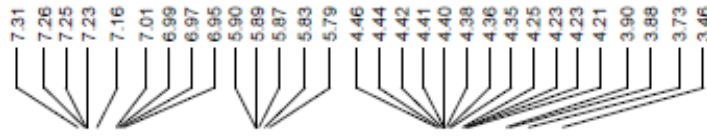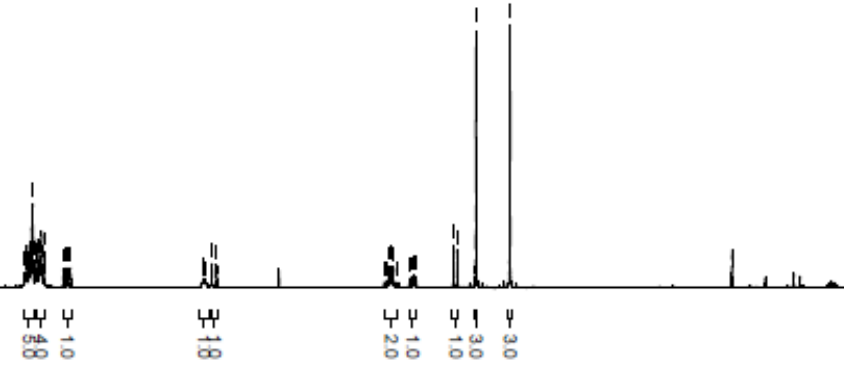

ppm (t1)

5.0

ads 2305

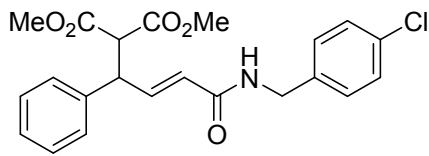

**2d**

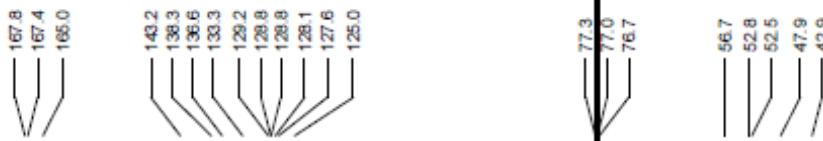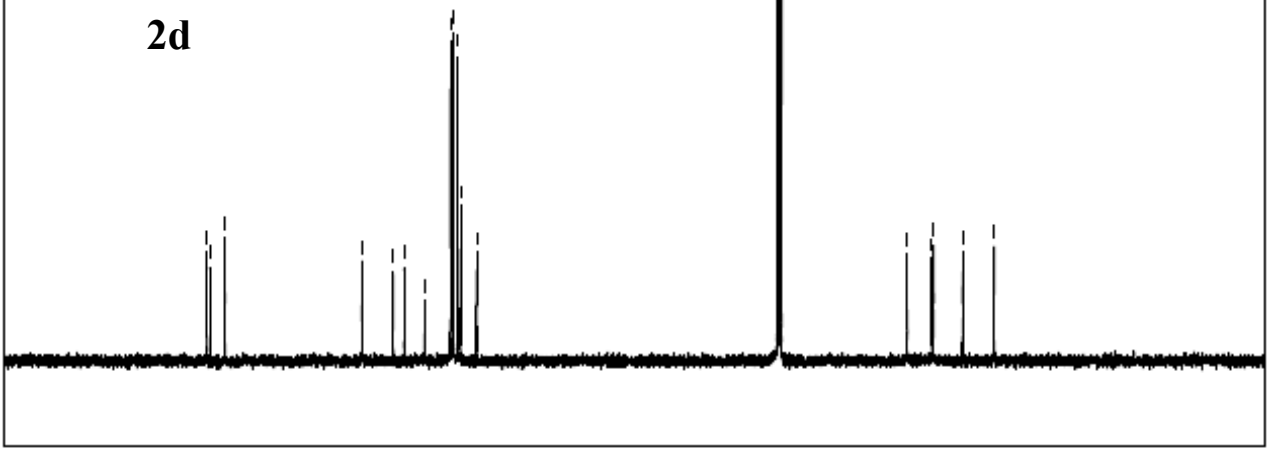

ppm (t1)

150

100

50



ads 2331

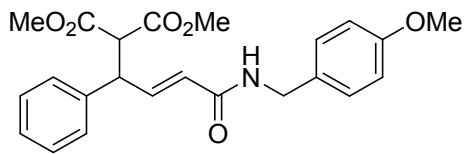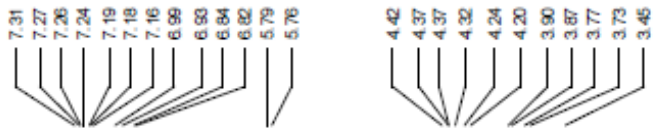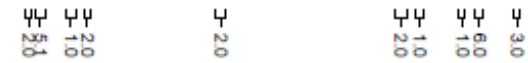

5.0

ppm (t1)

ads 2331

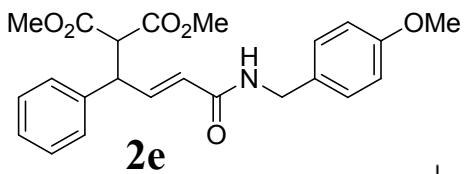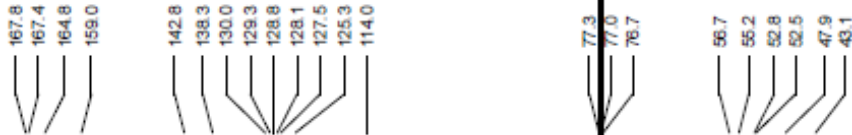

150

100

50

ppm (t1)

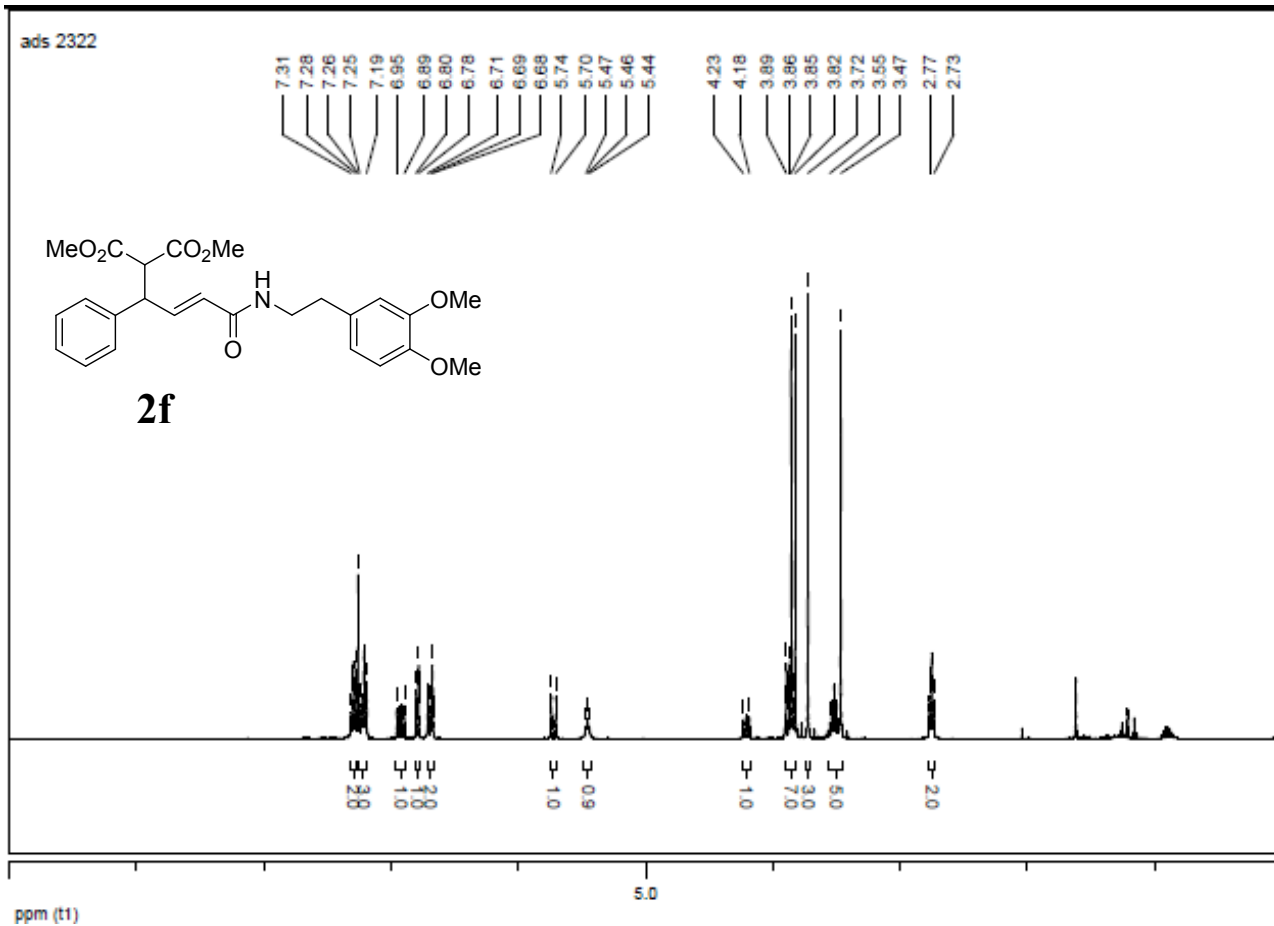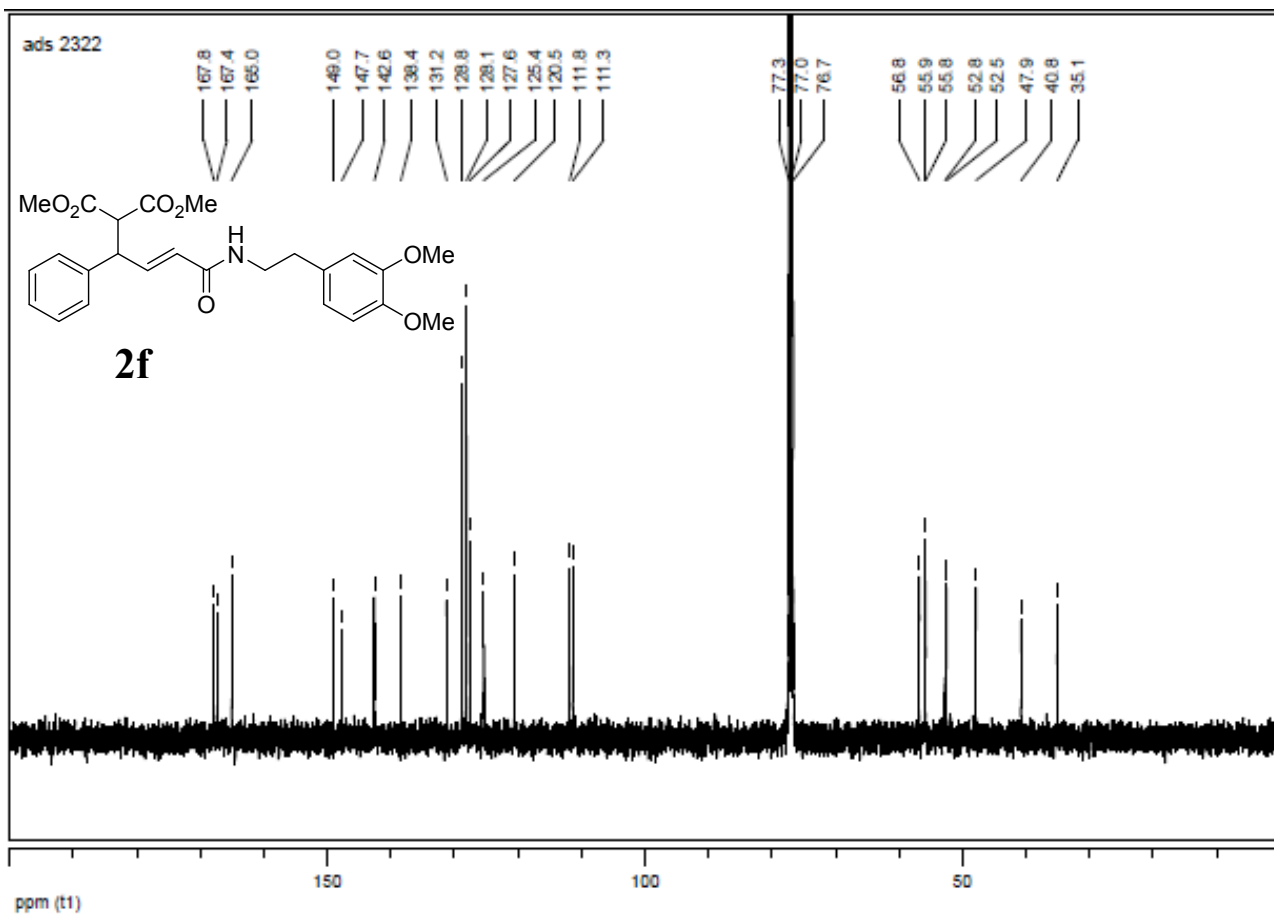

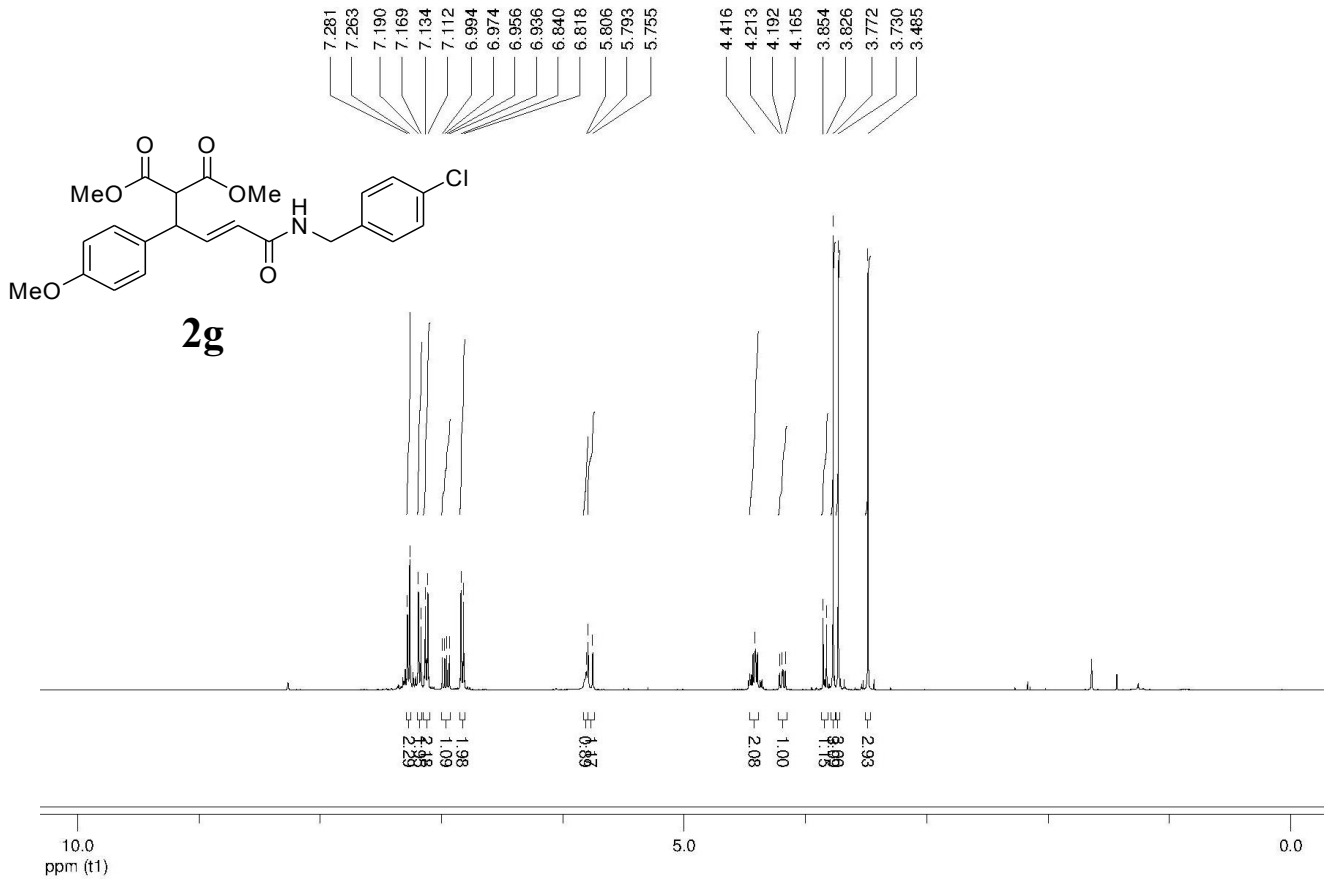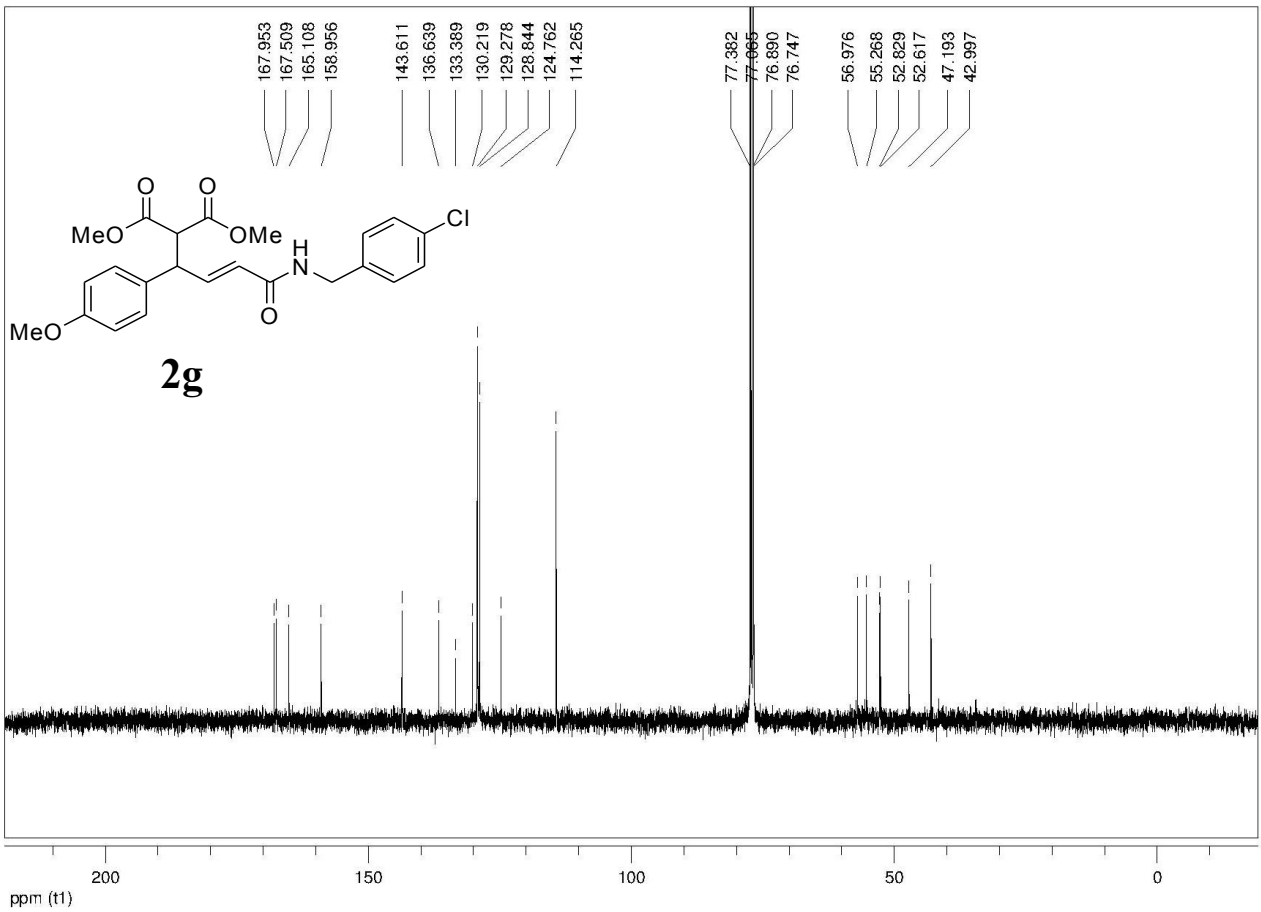

ads 2332

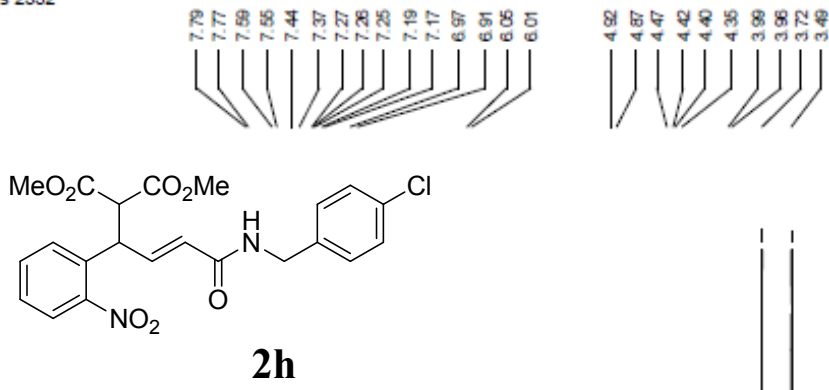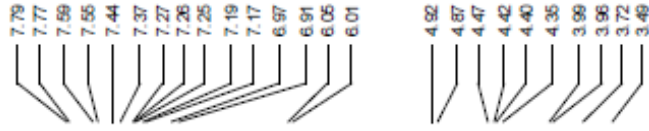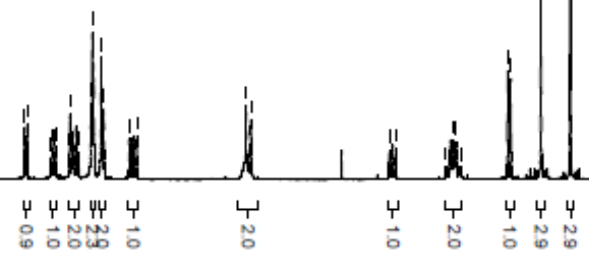

ppm (t1)

5.0

ads 2332

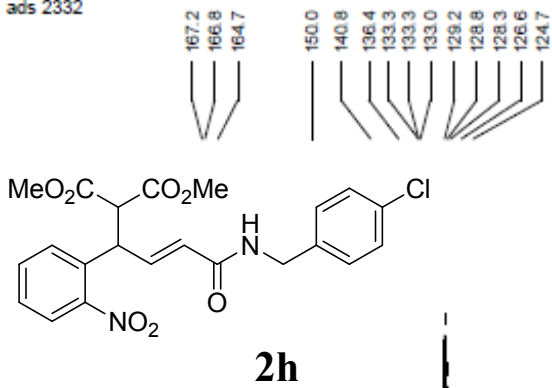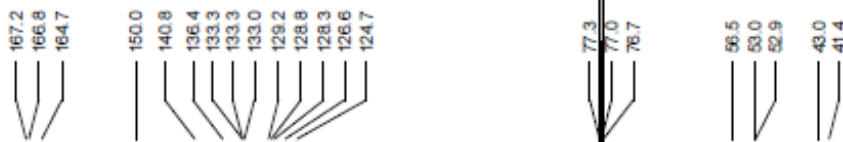

ppm (t1)

150

100

50

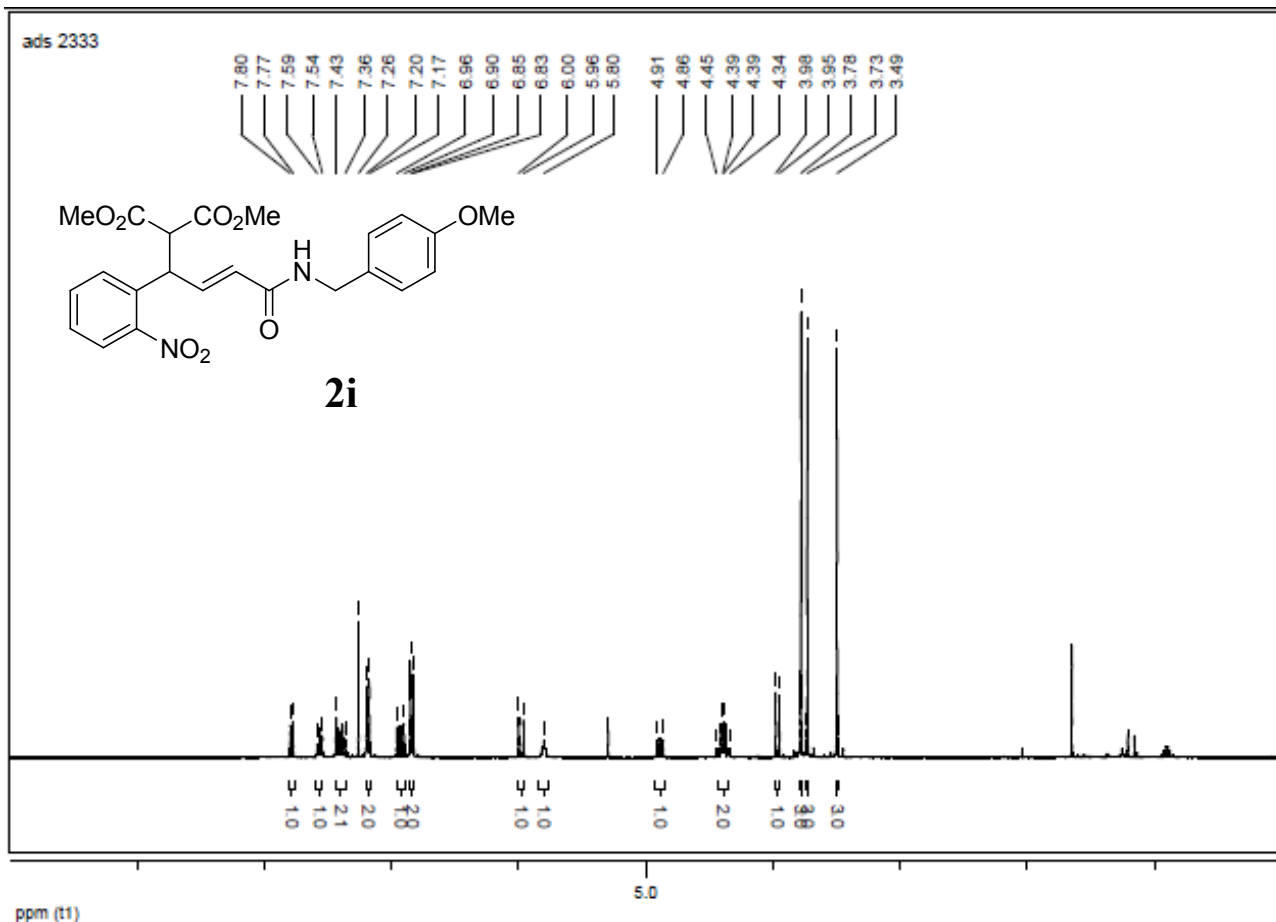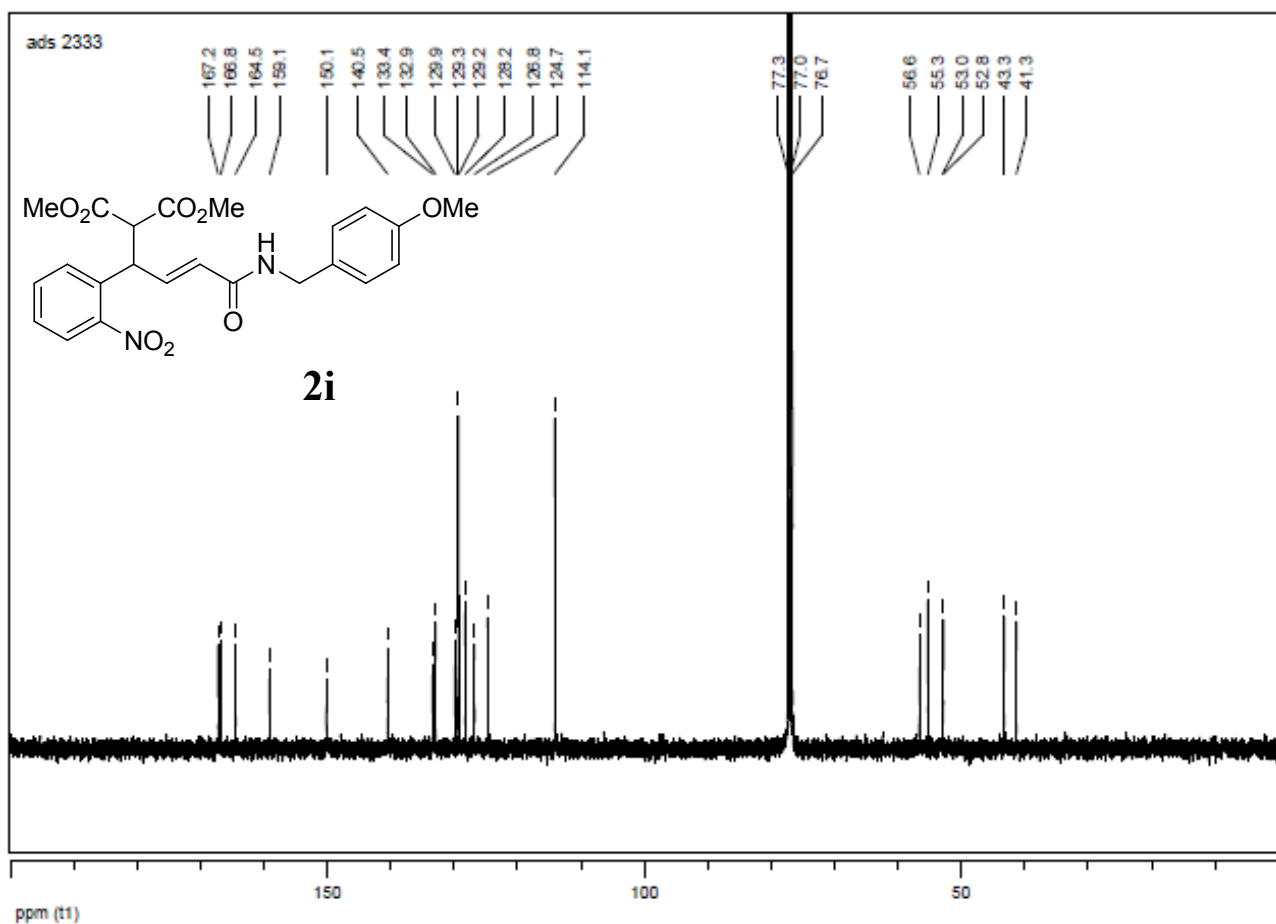





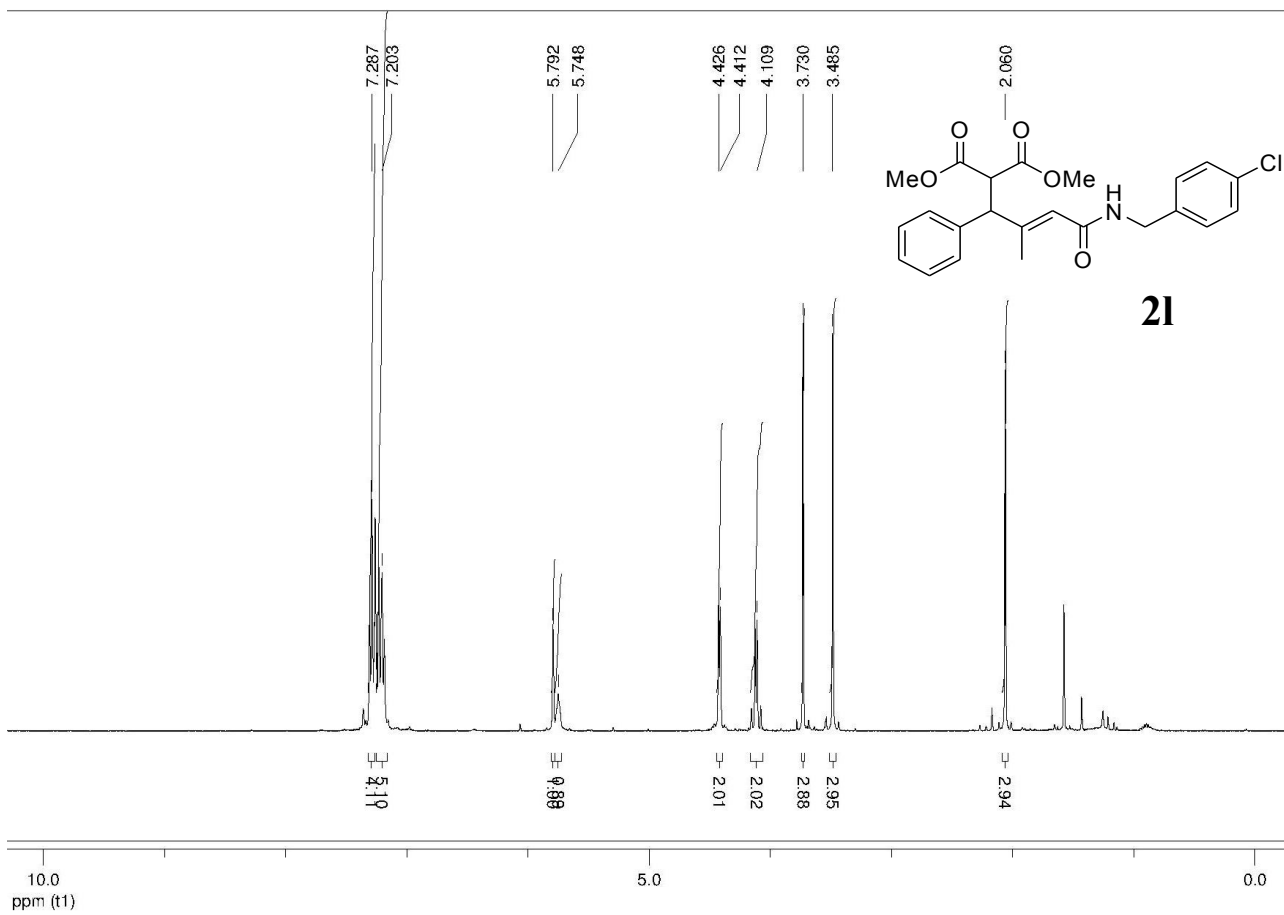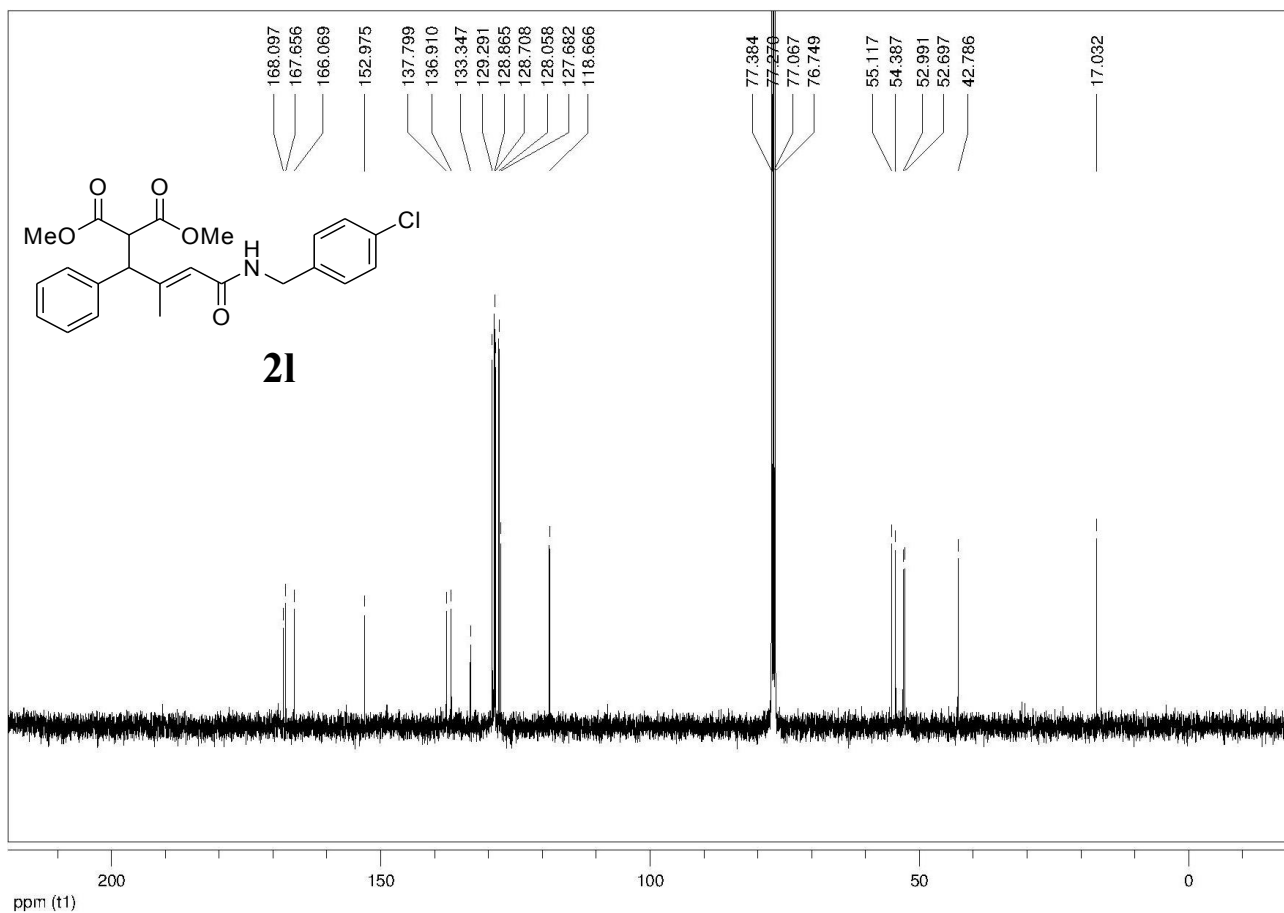



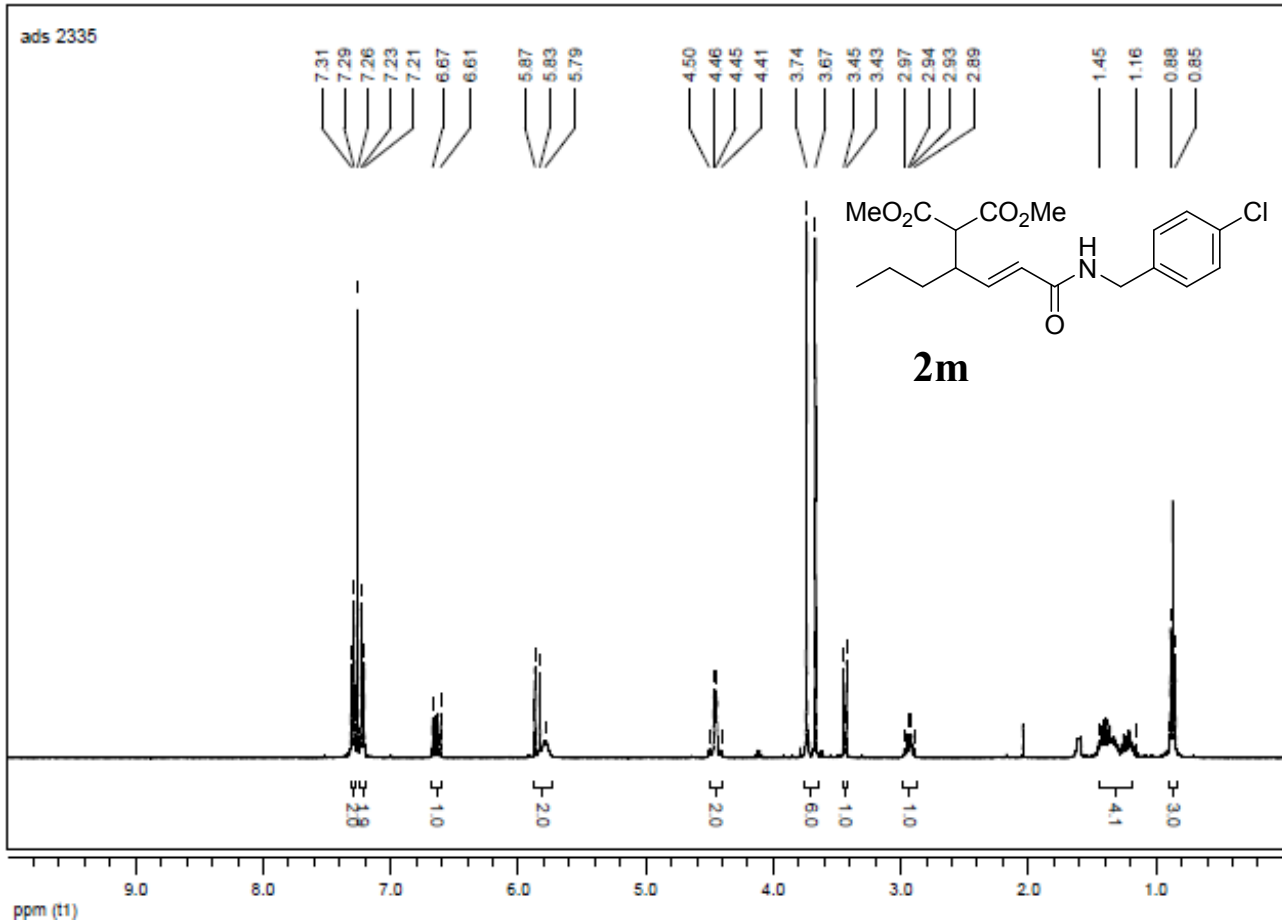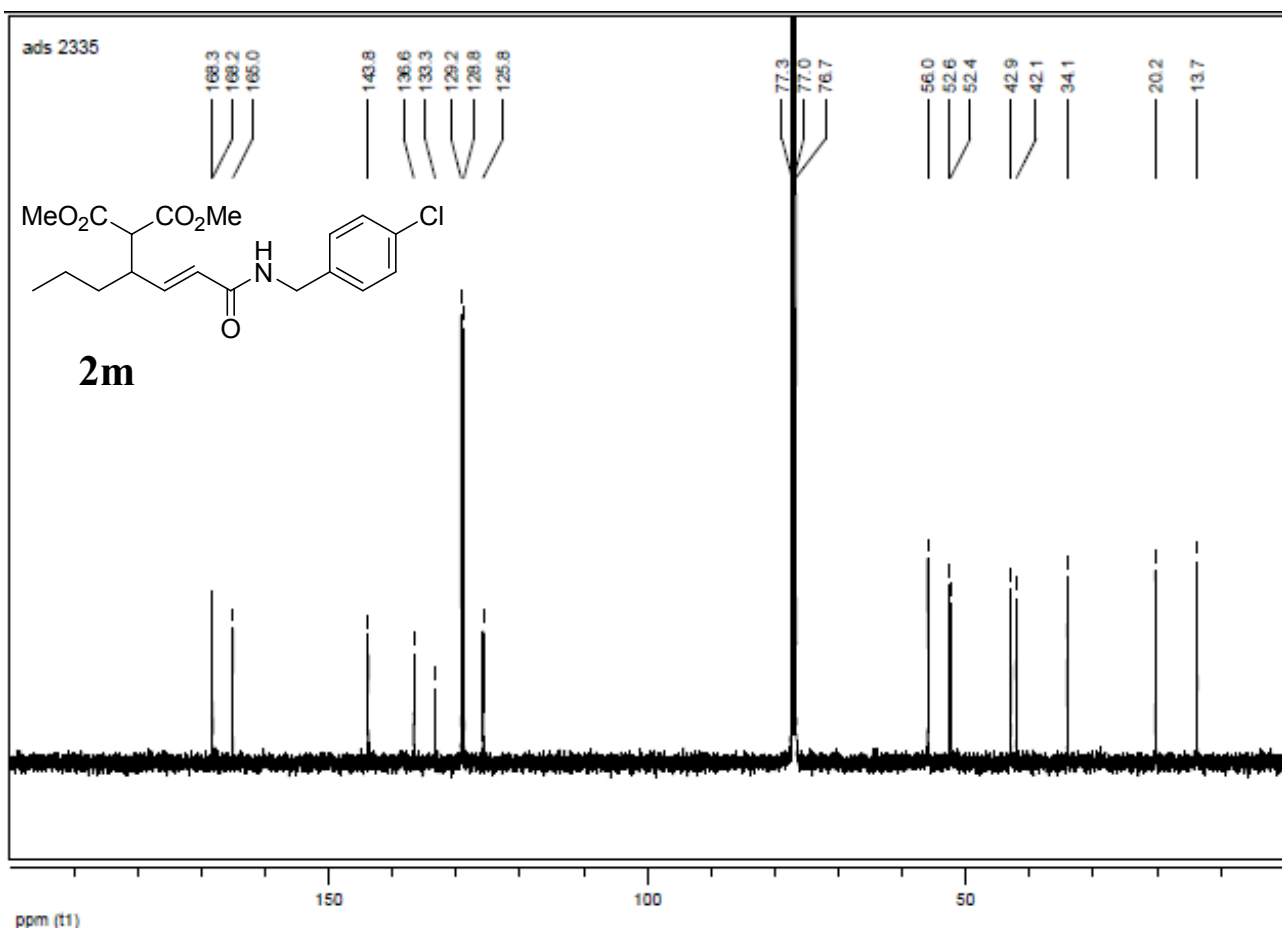

ads 2315

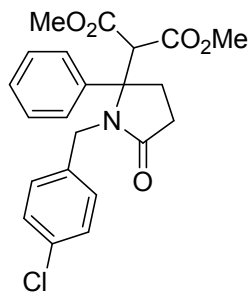

3d

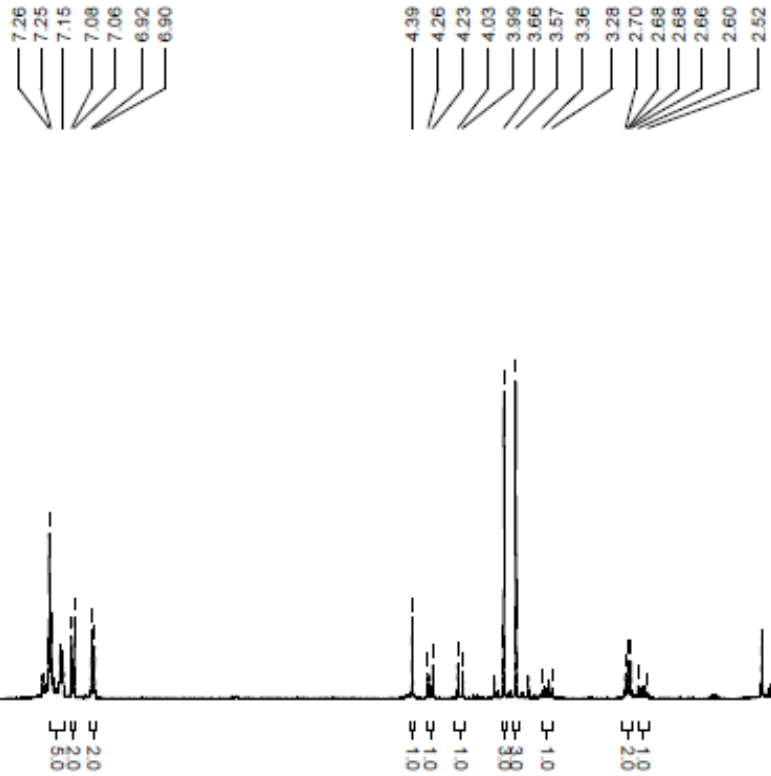

ppm (t1)

ads 2315

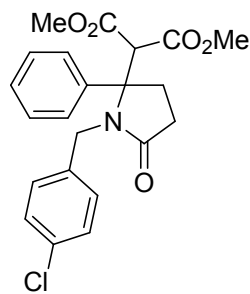

3d

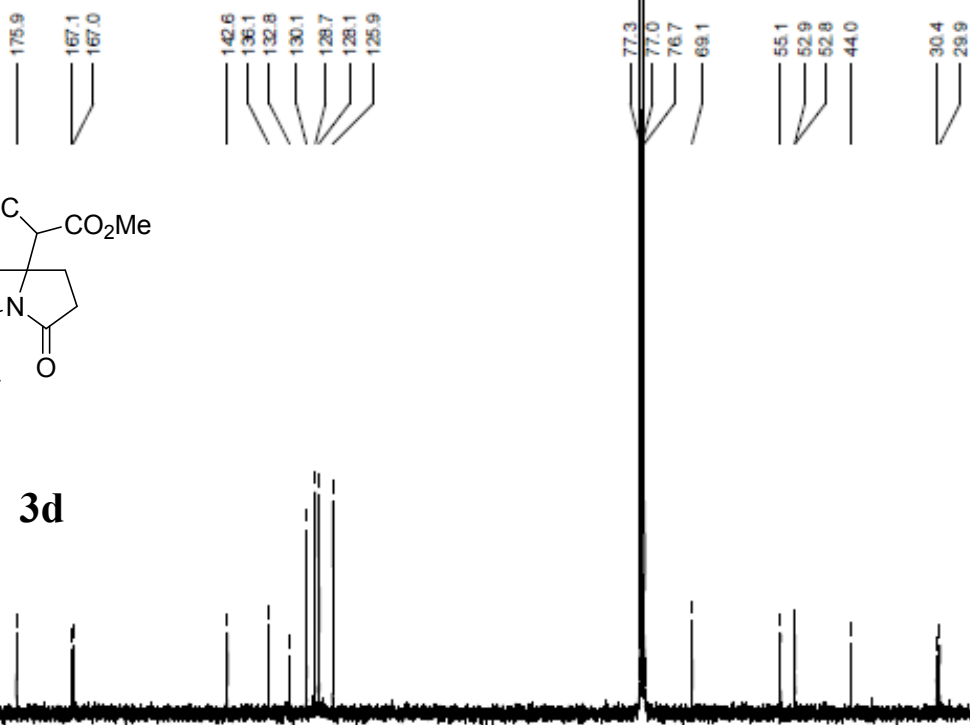

ppm (t1)

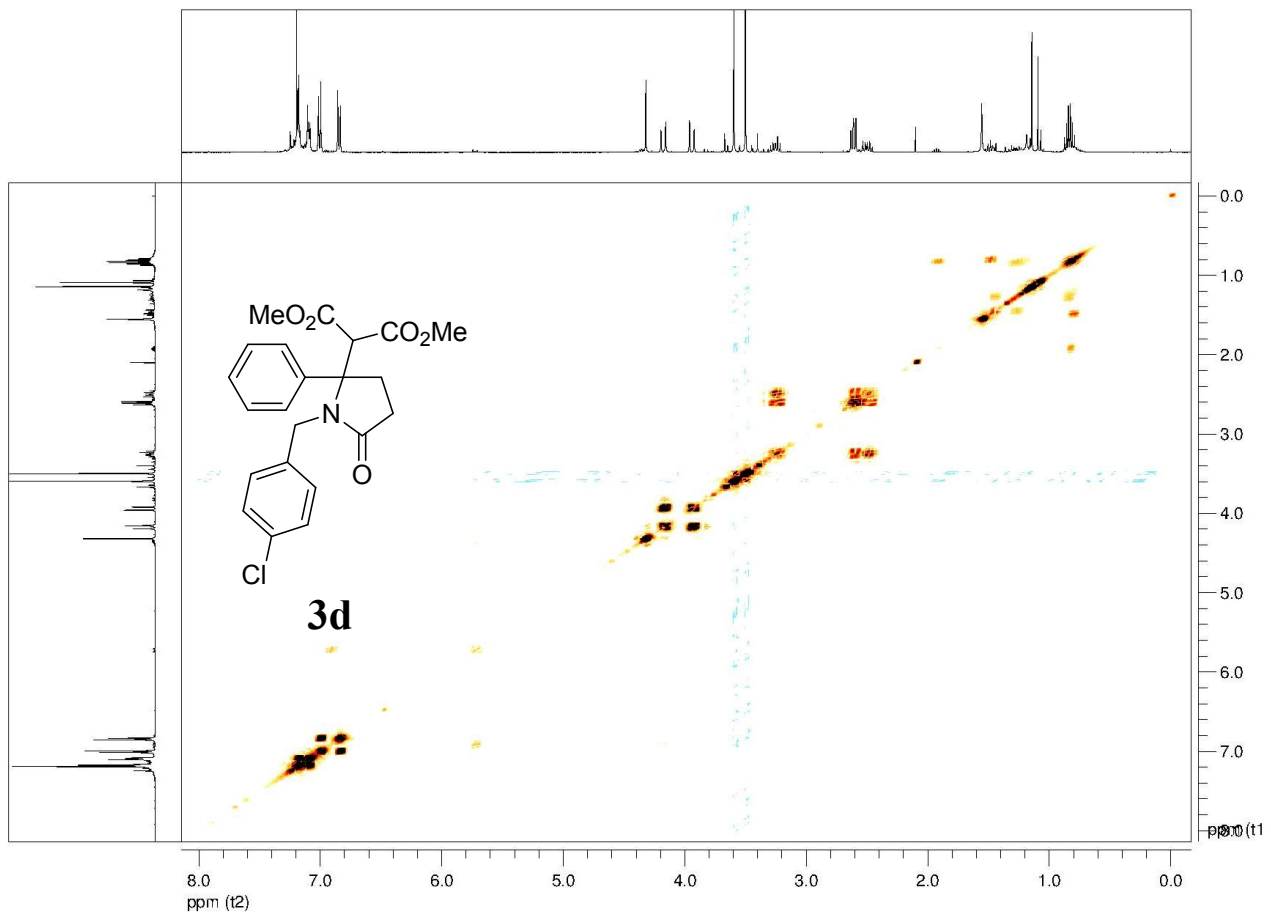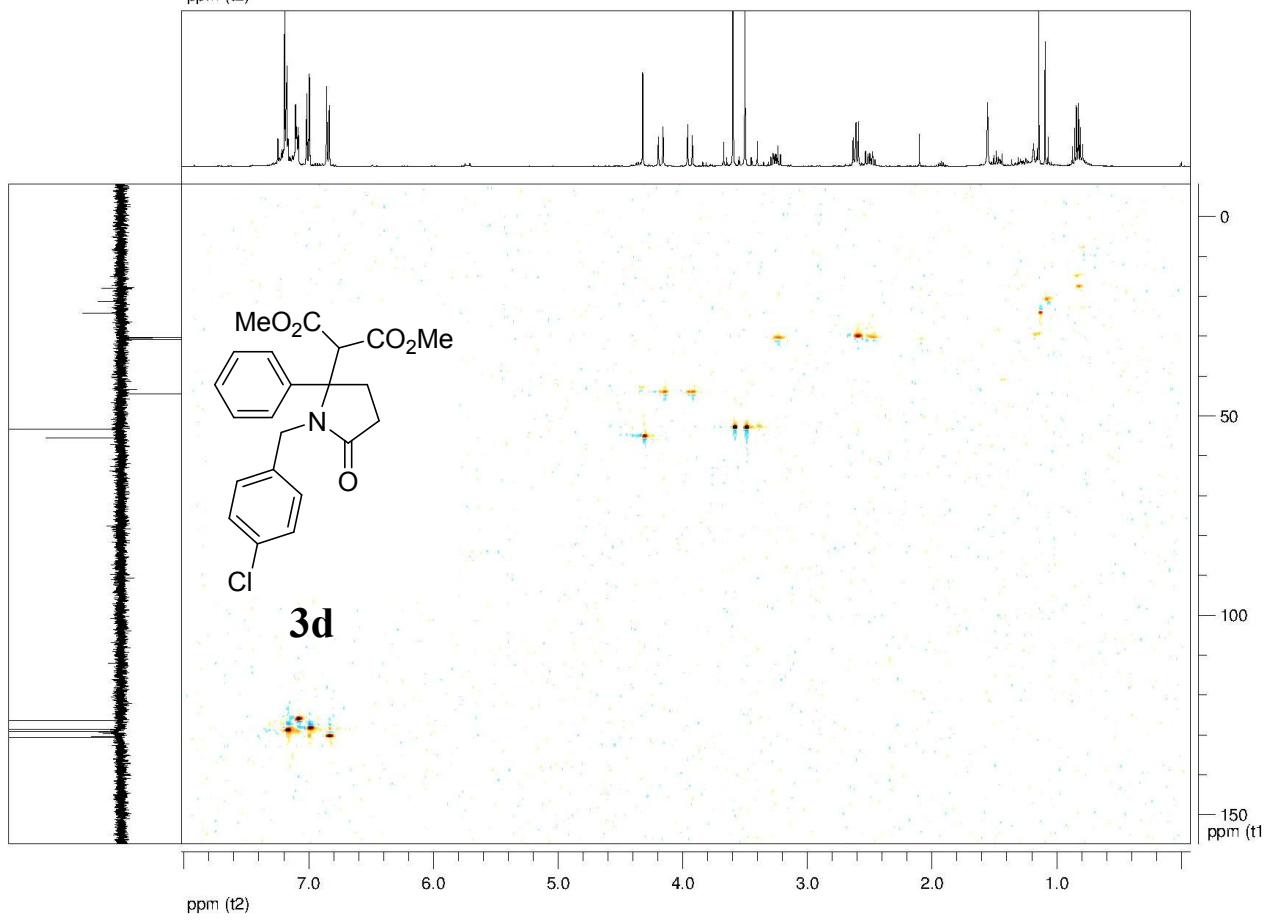

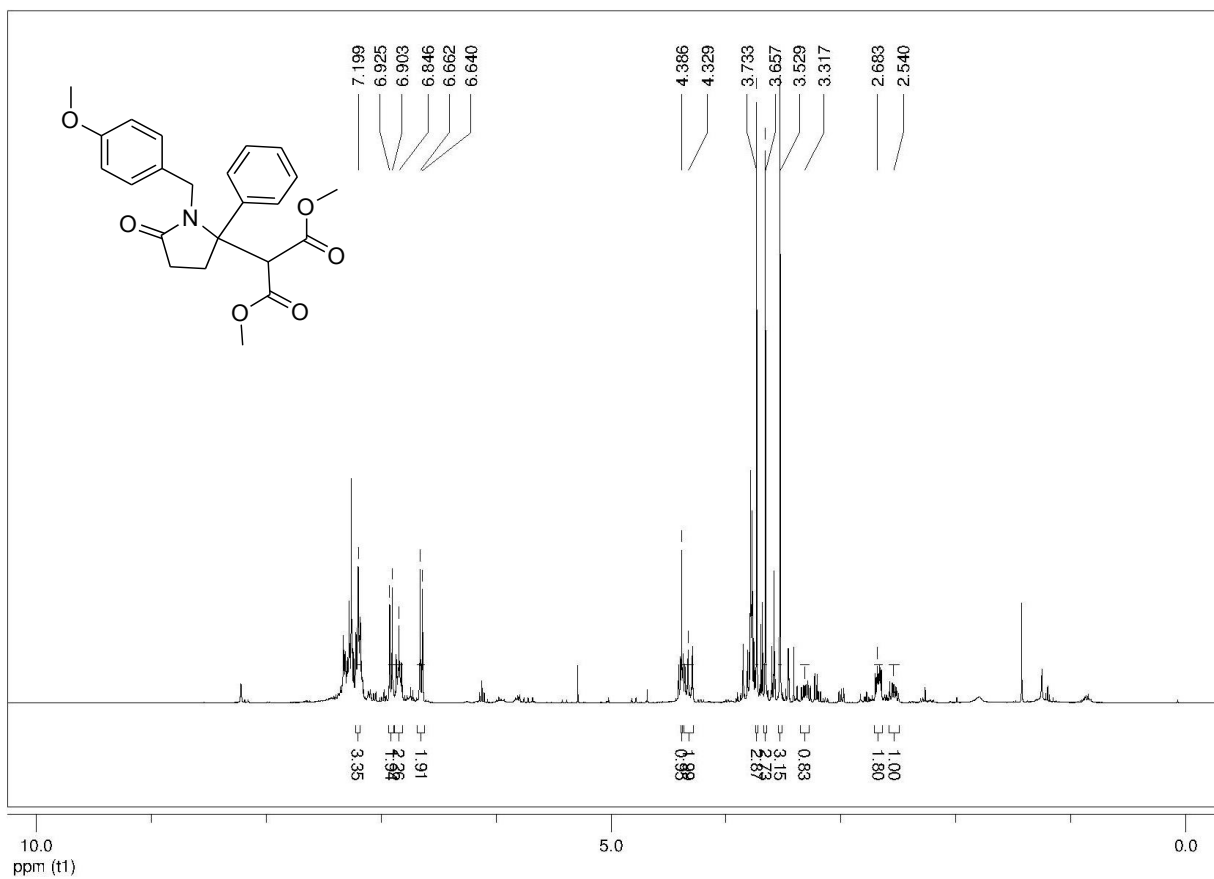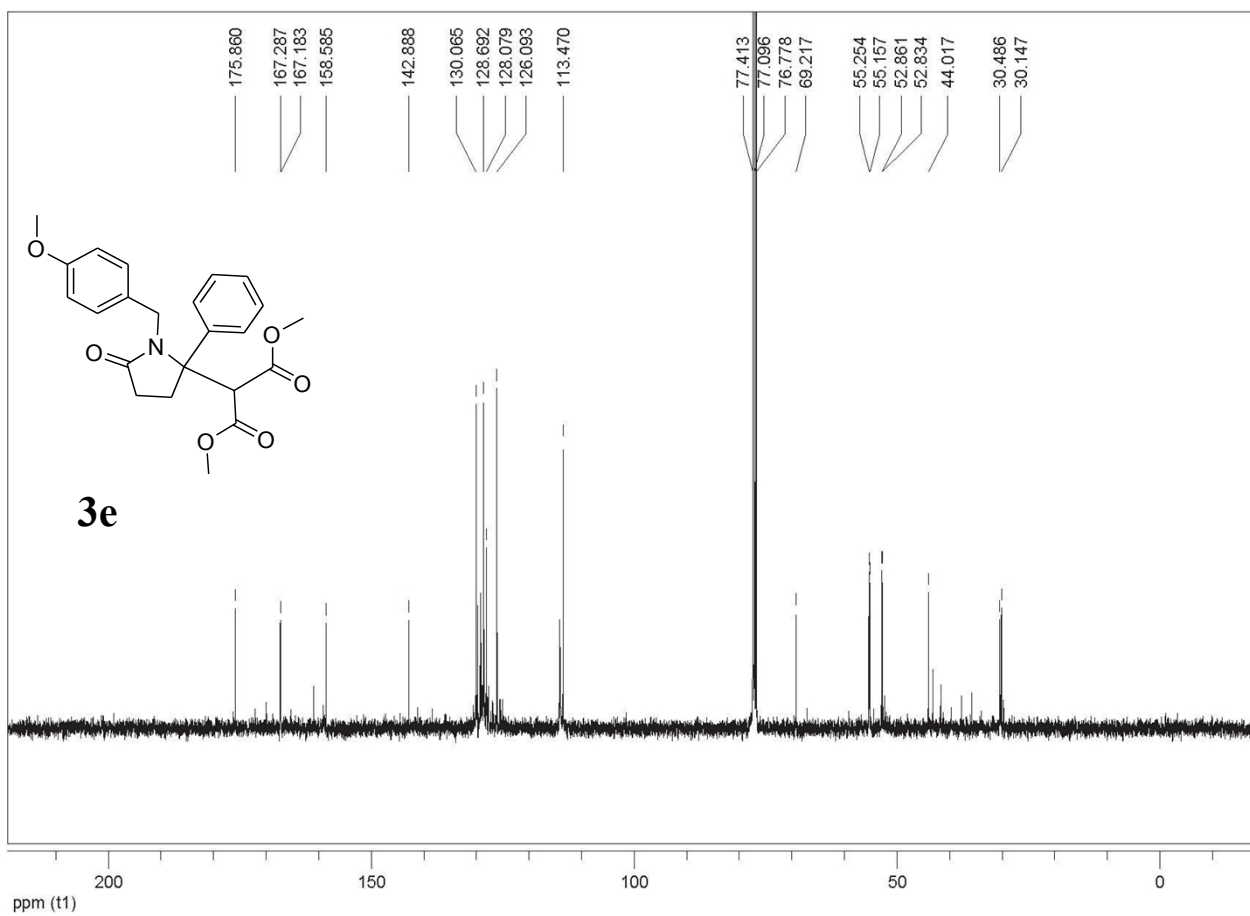

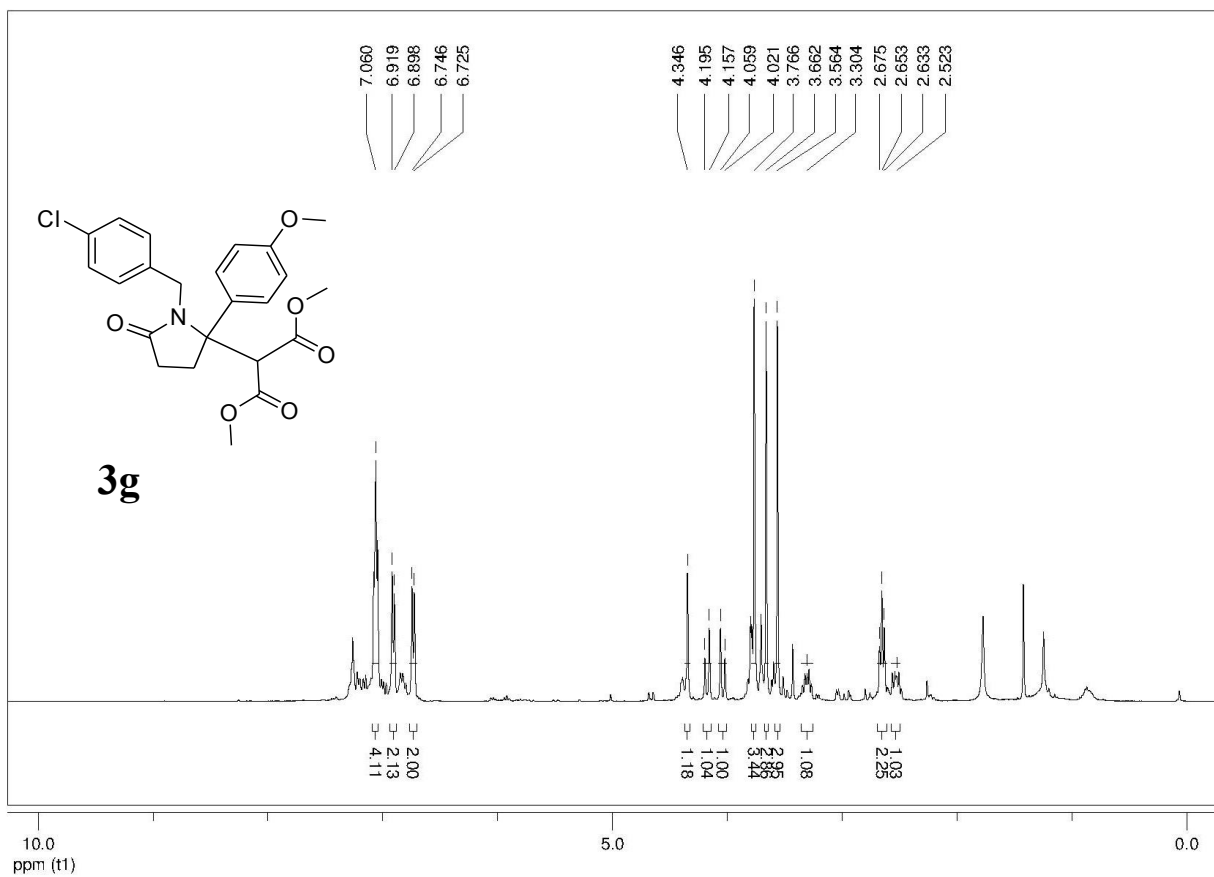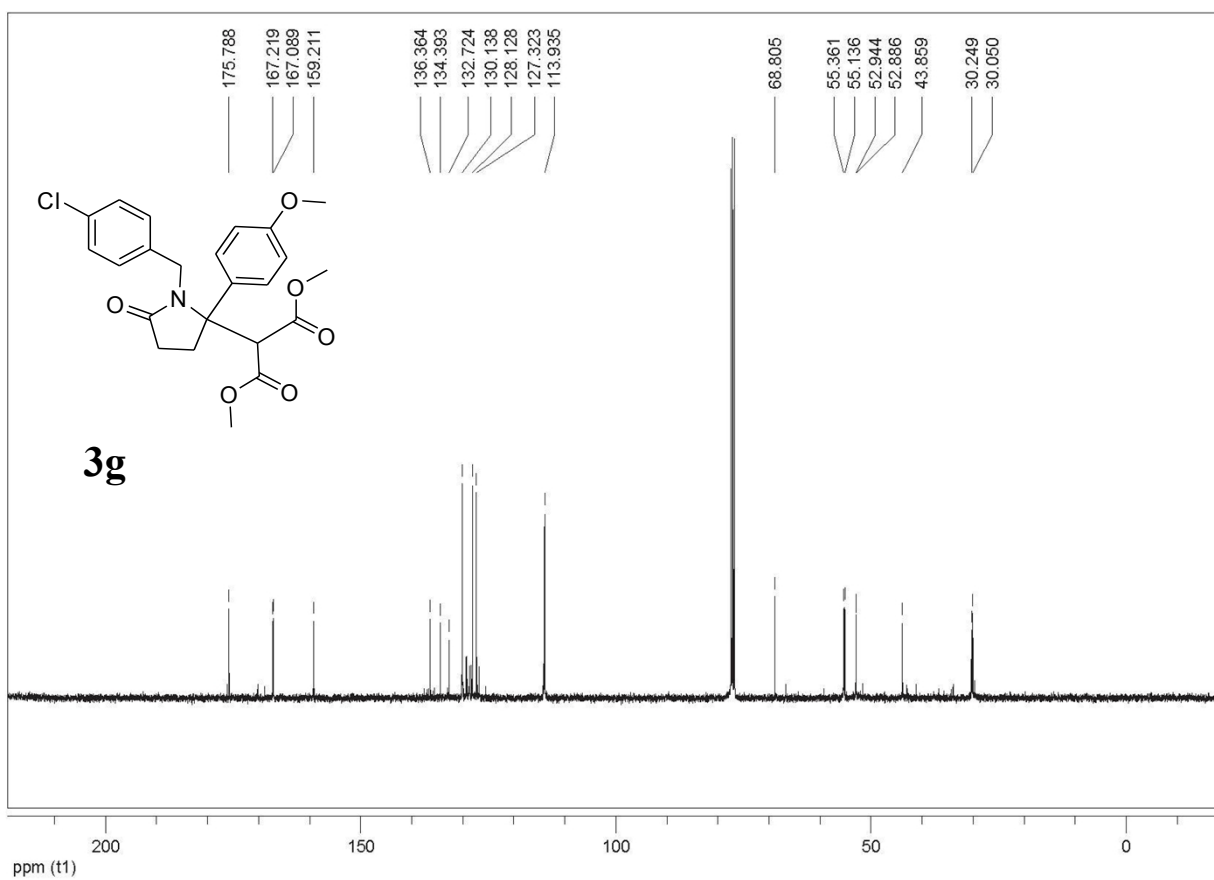

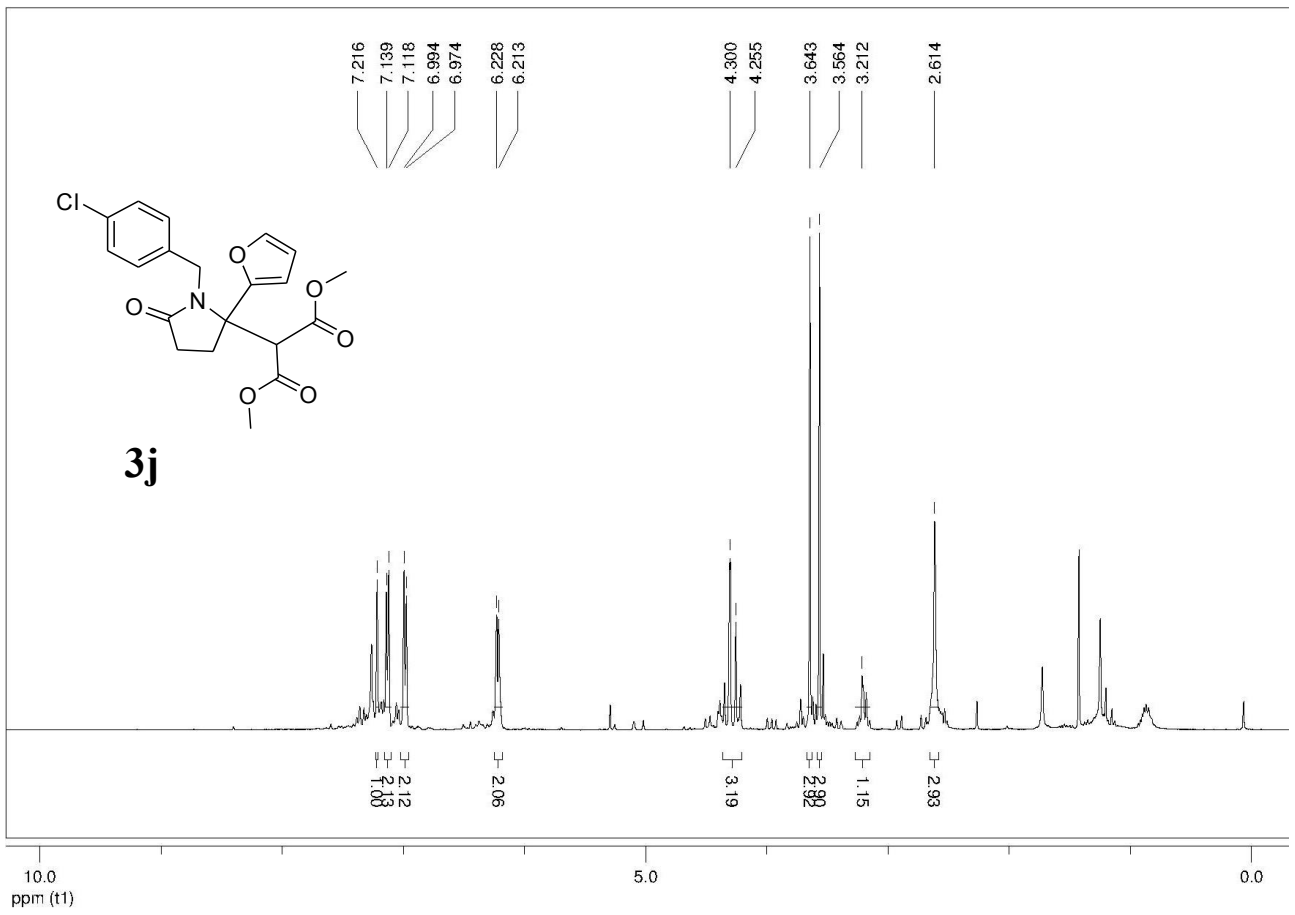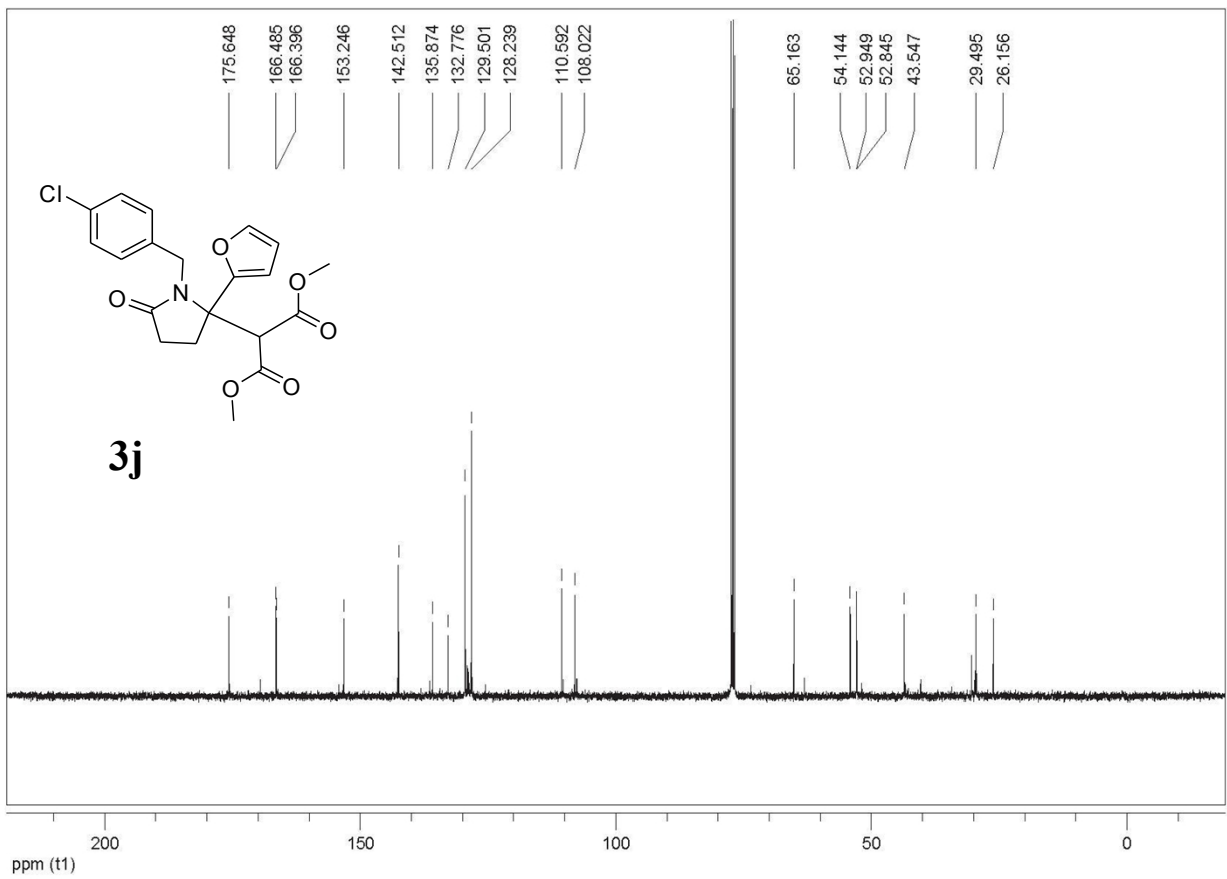

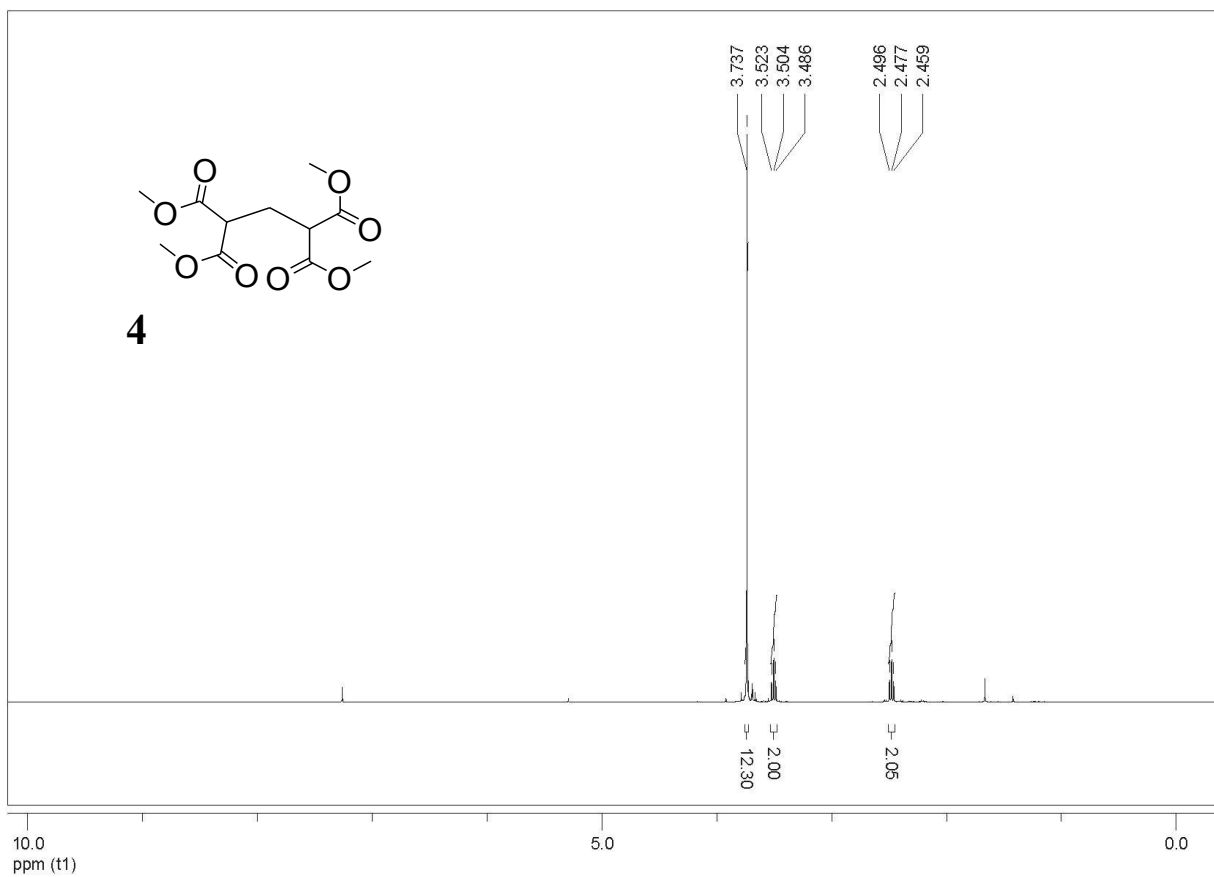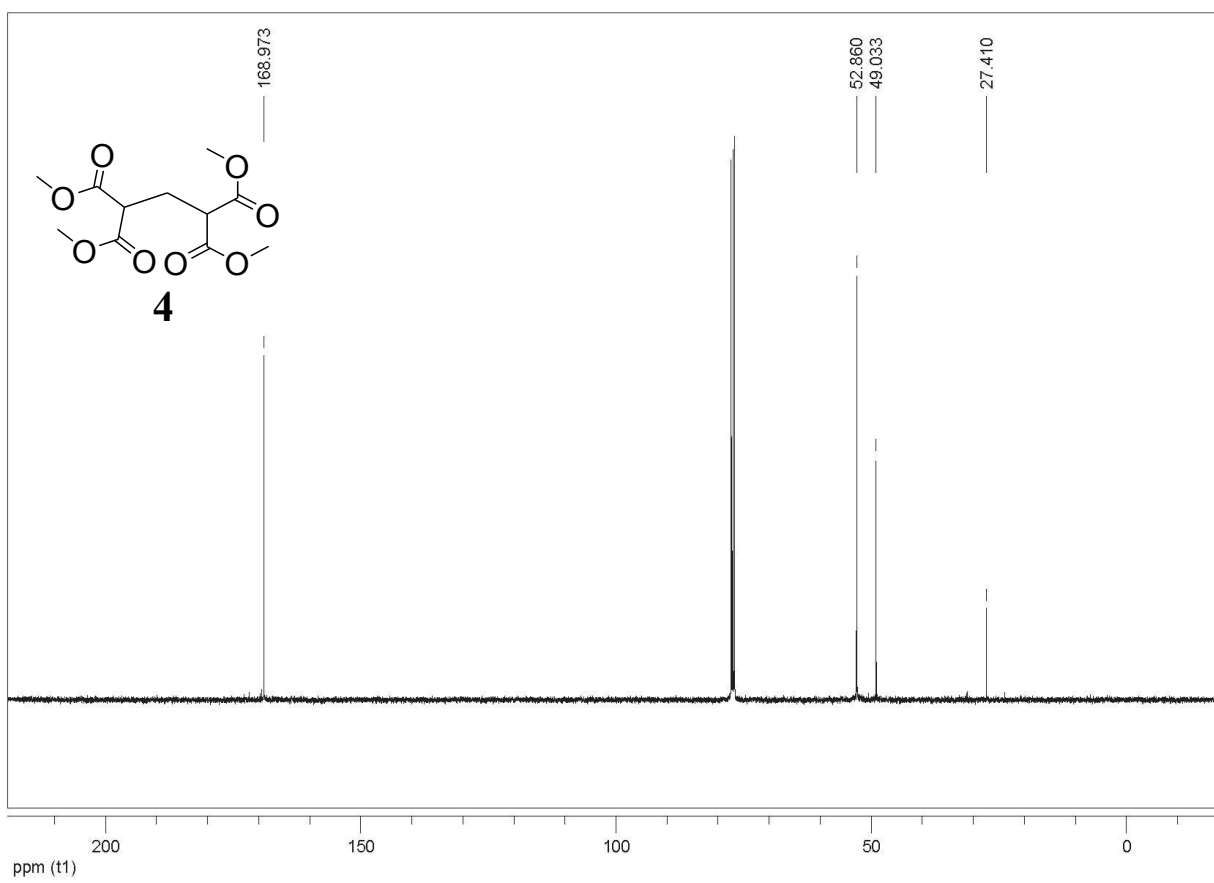

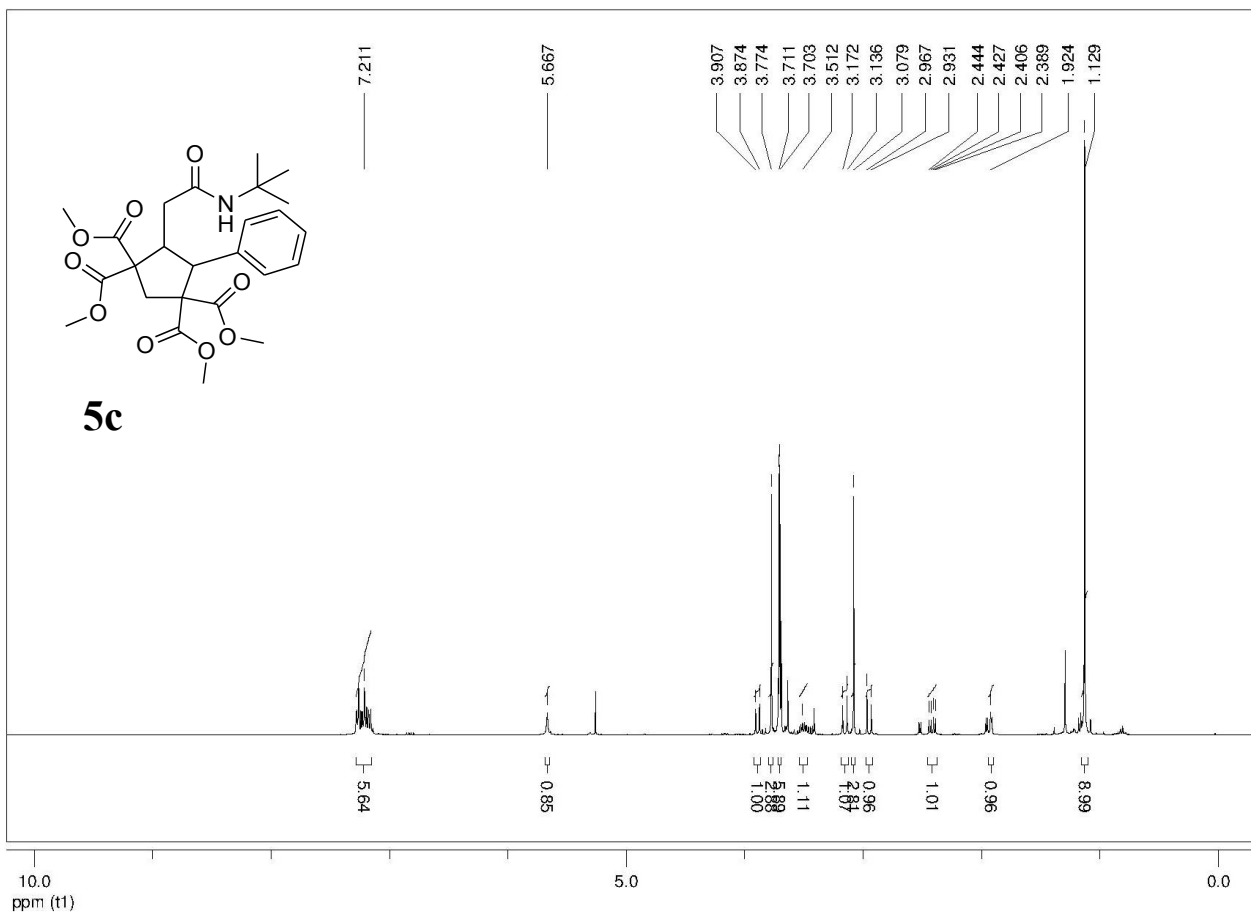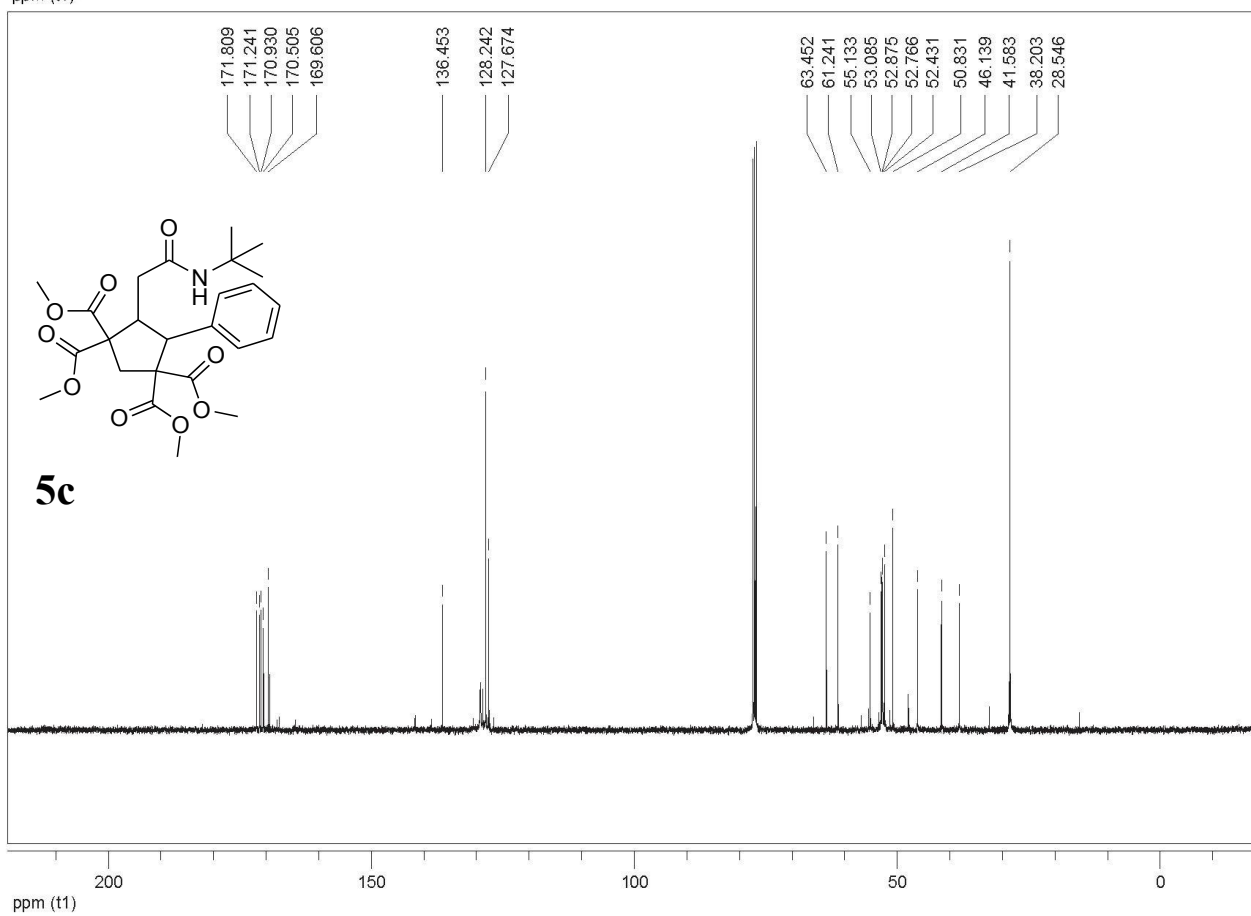



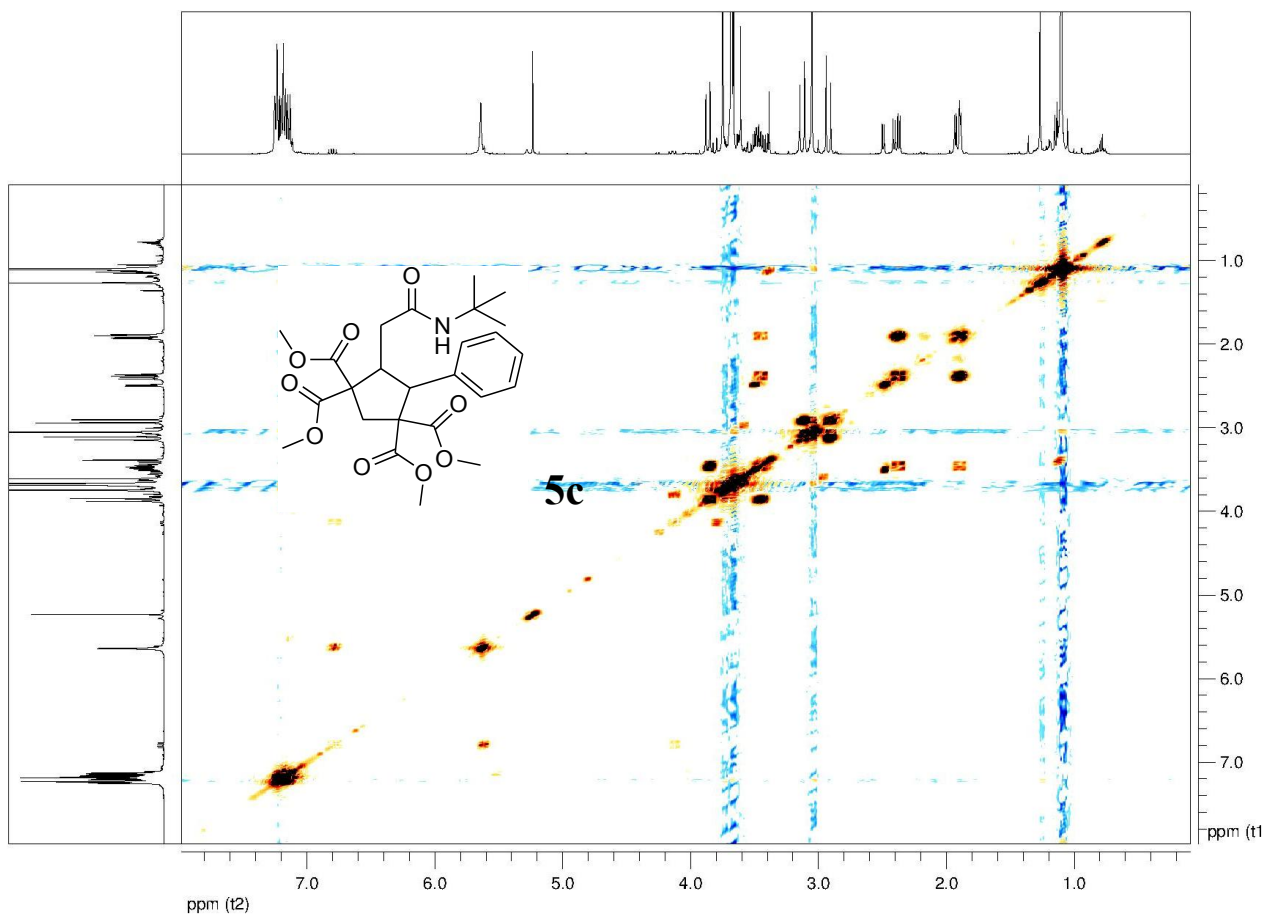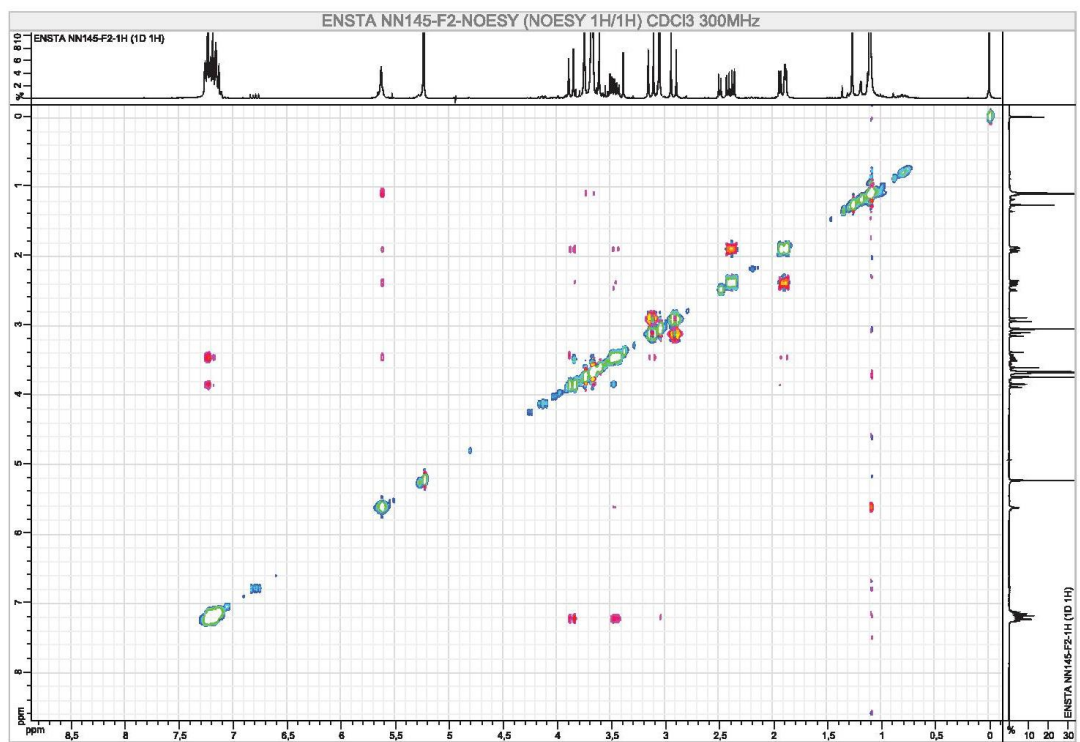

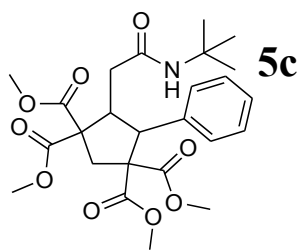

Y (NOESY 1H/1H) C

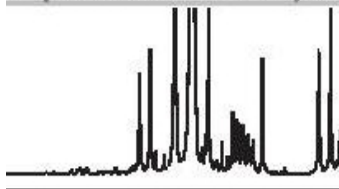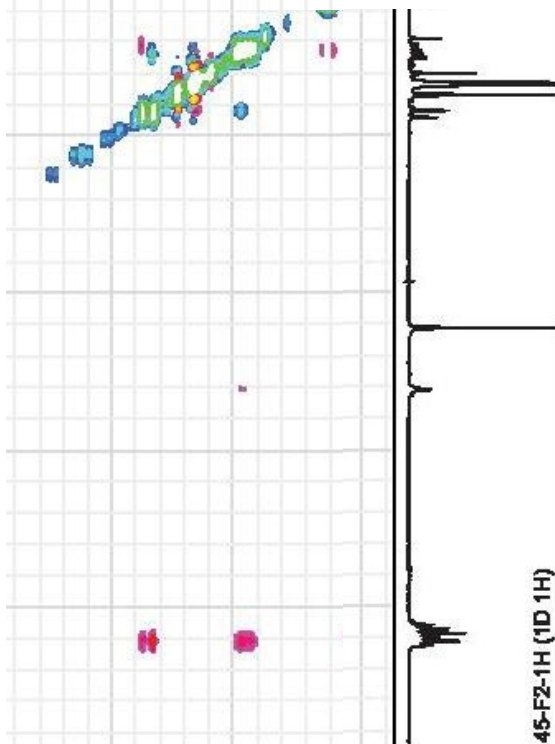

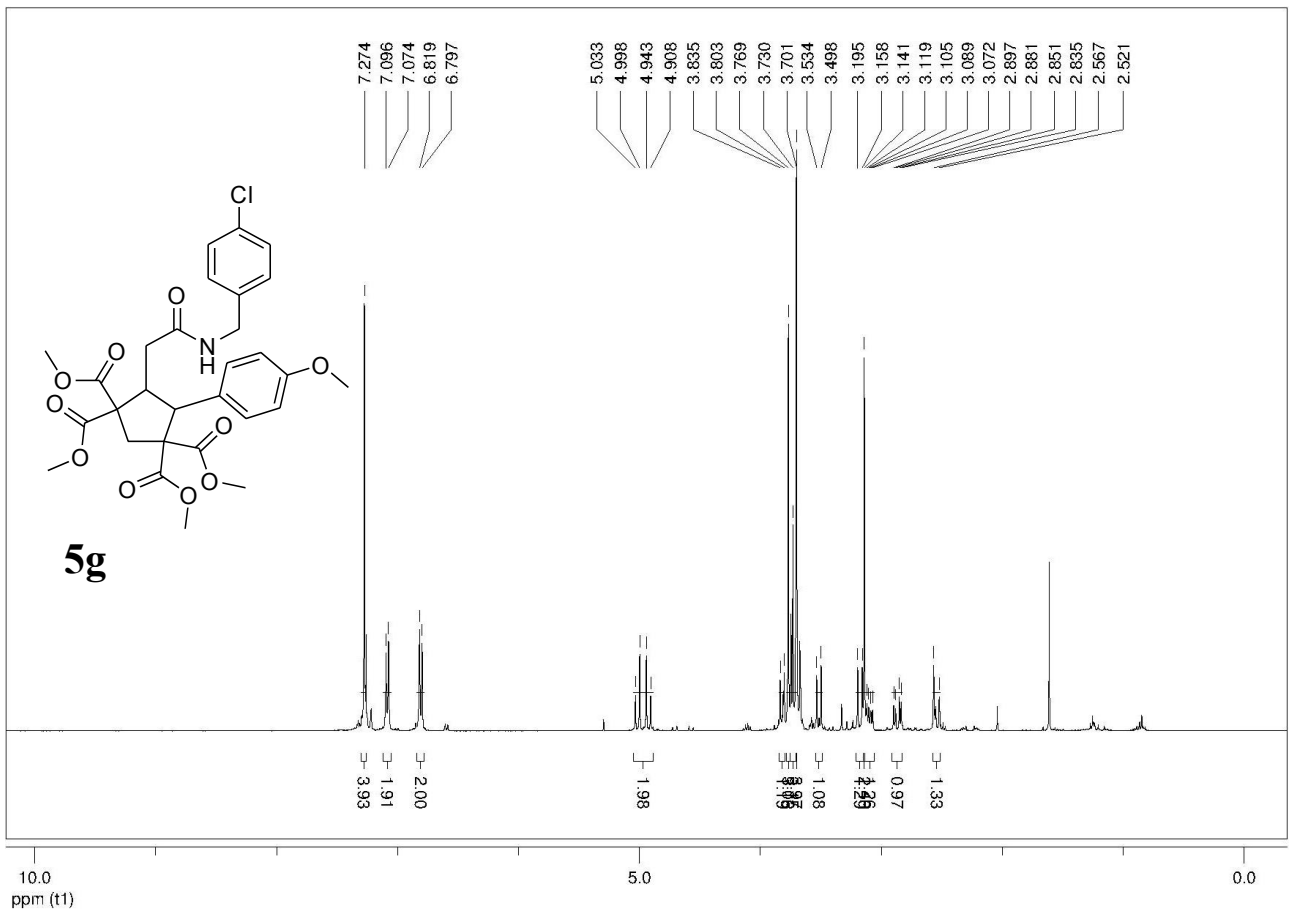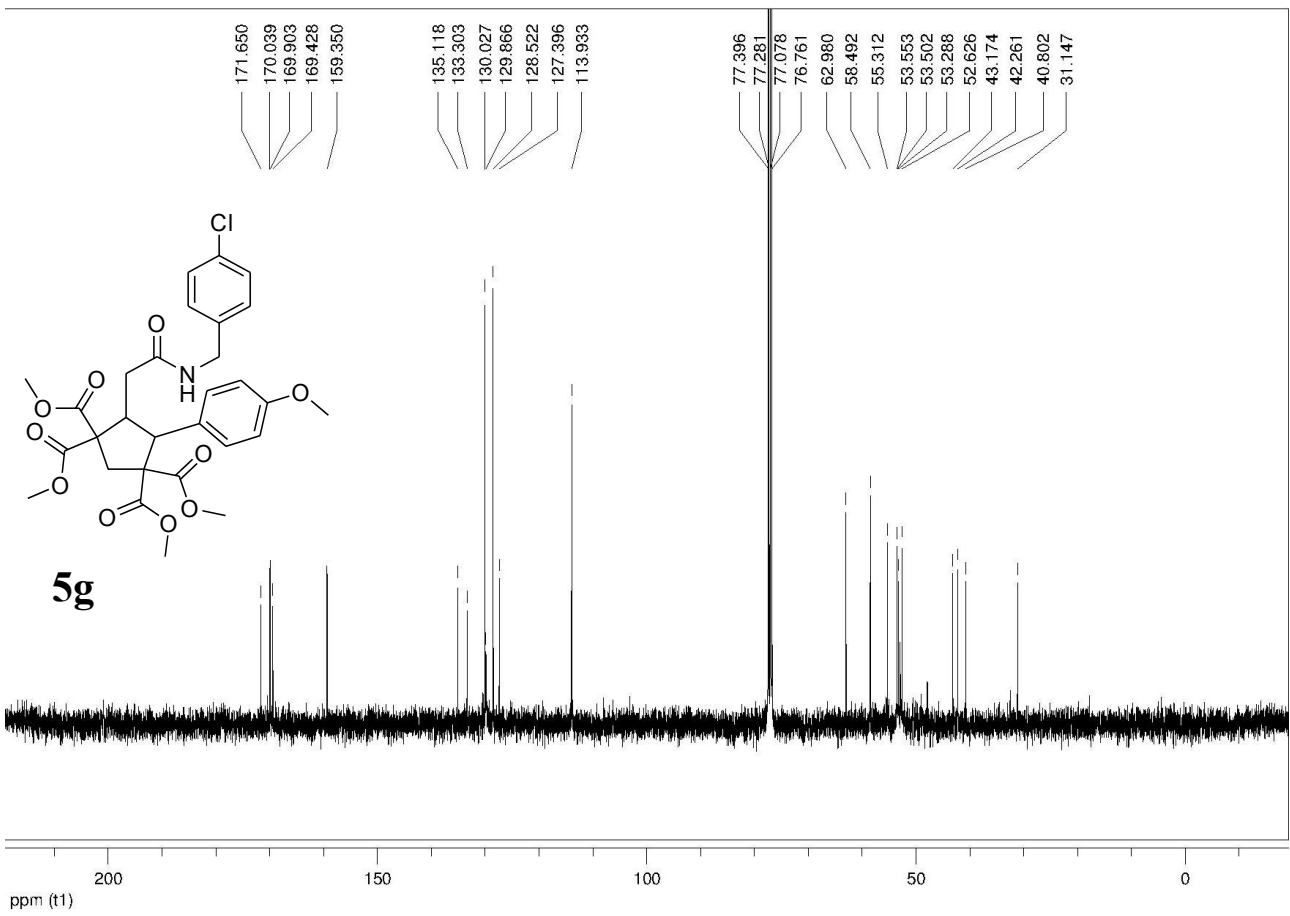

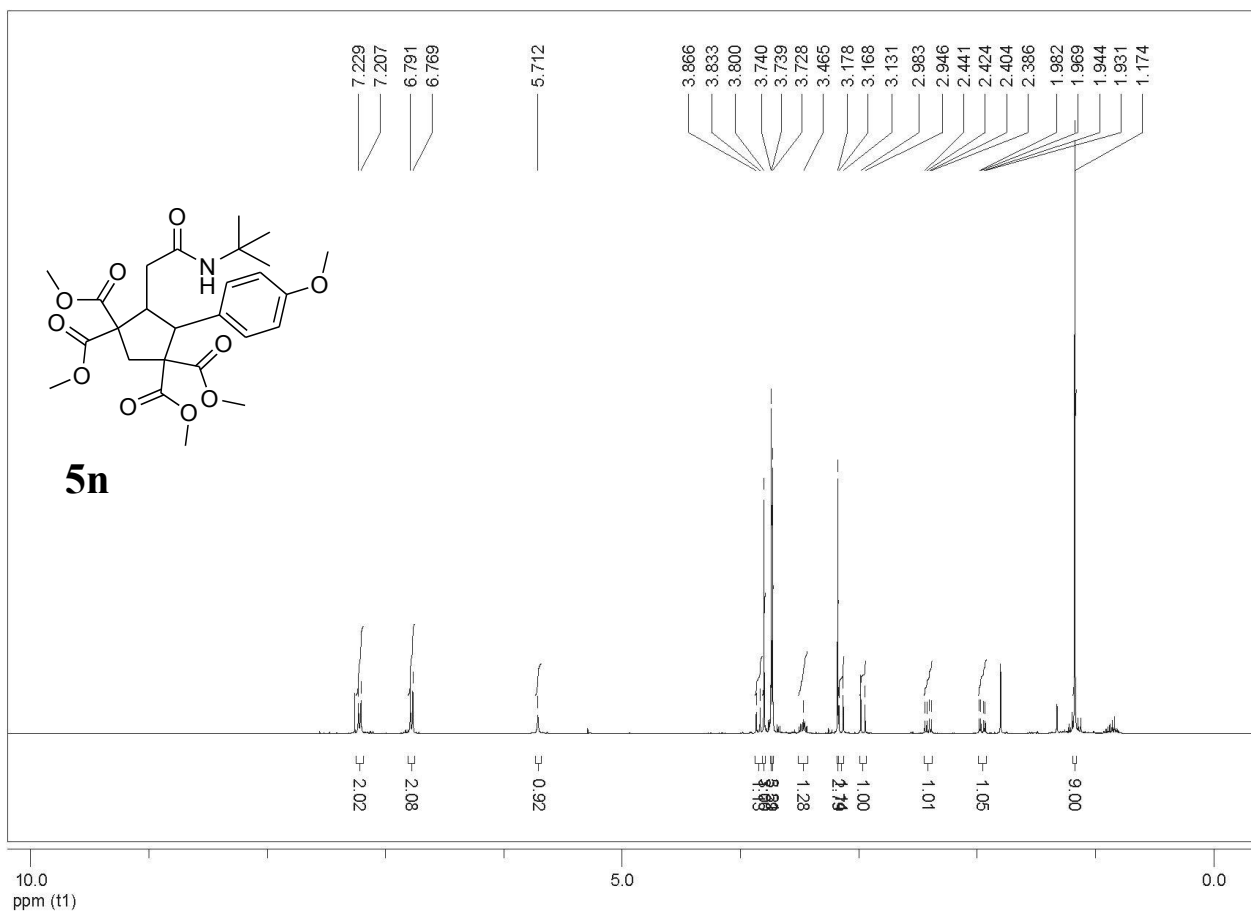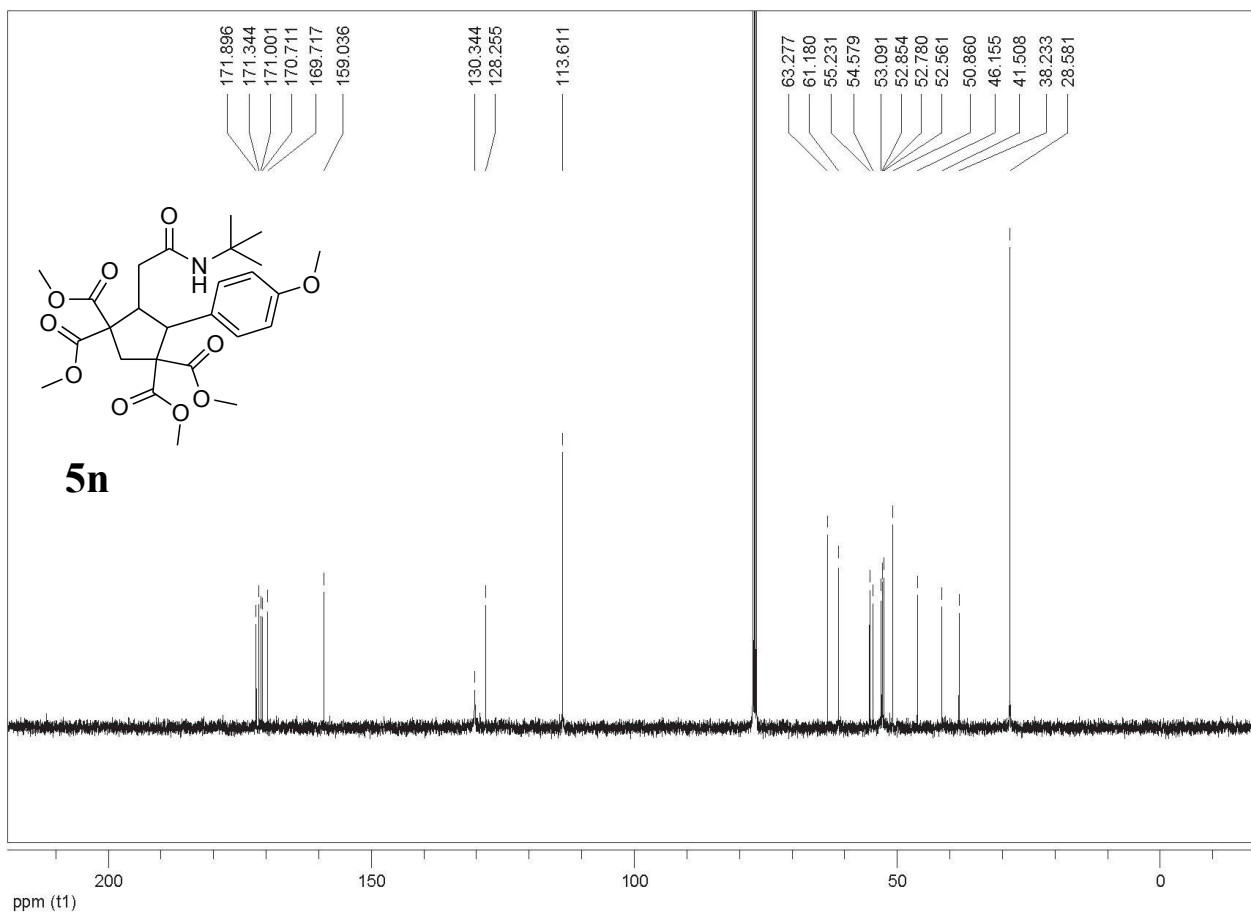

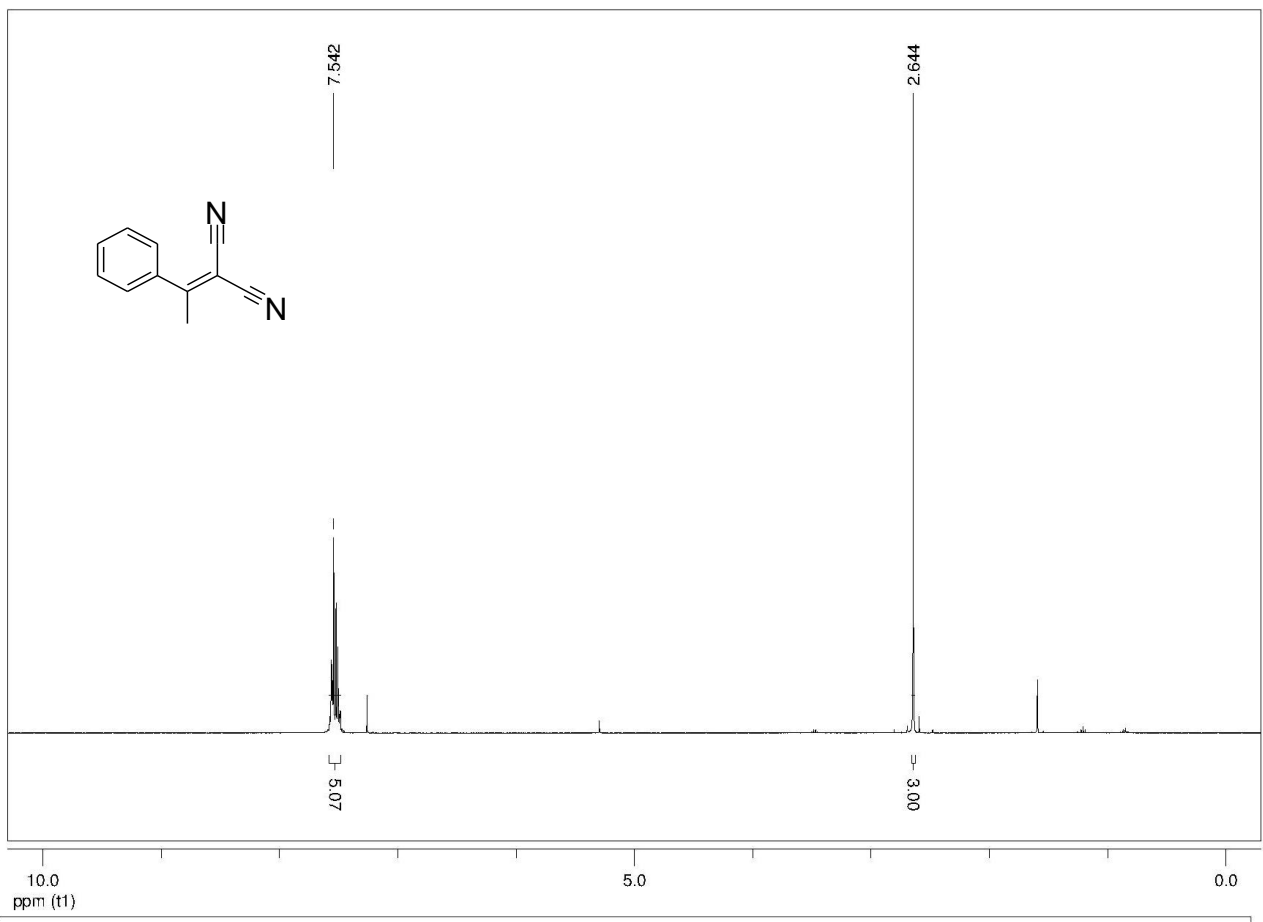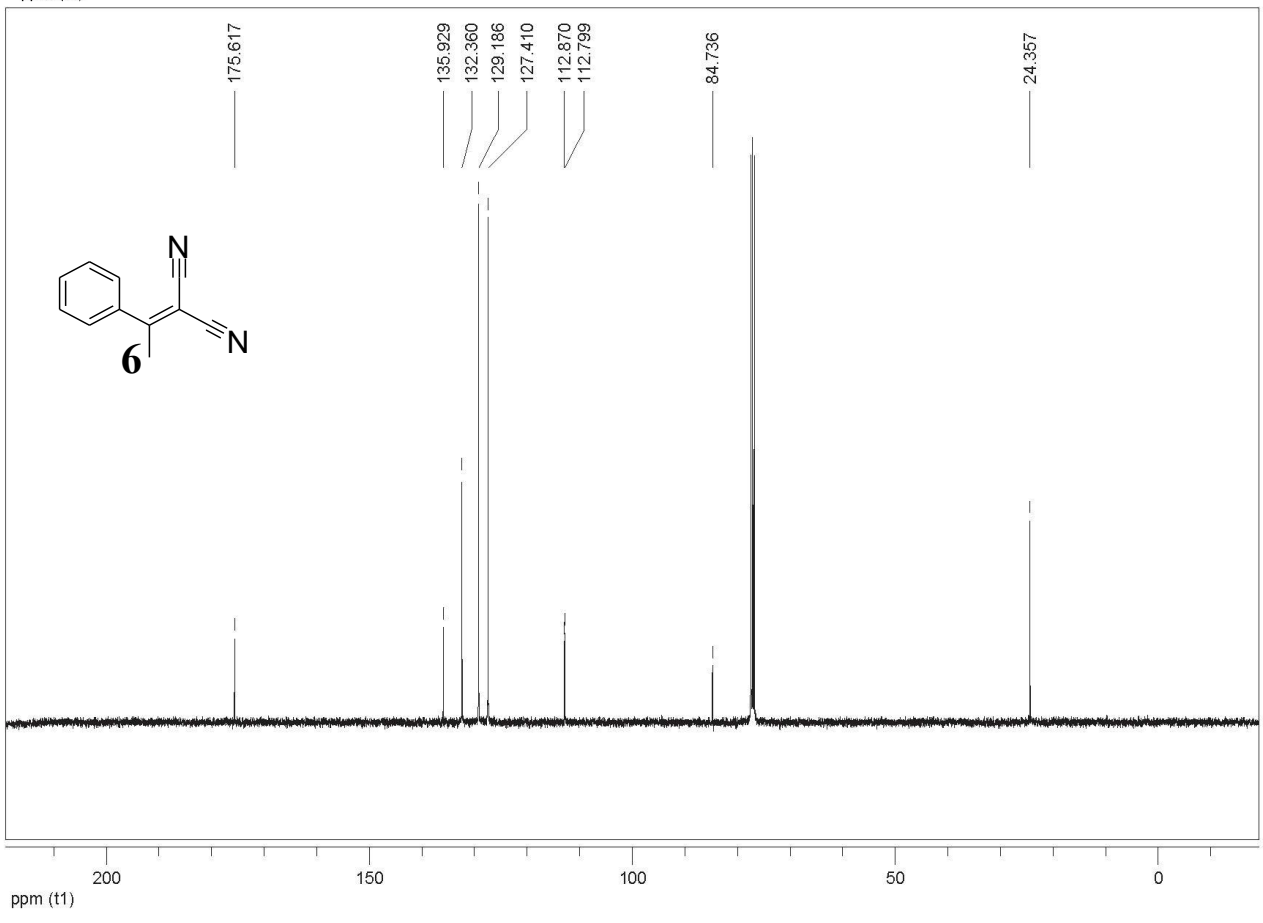

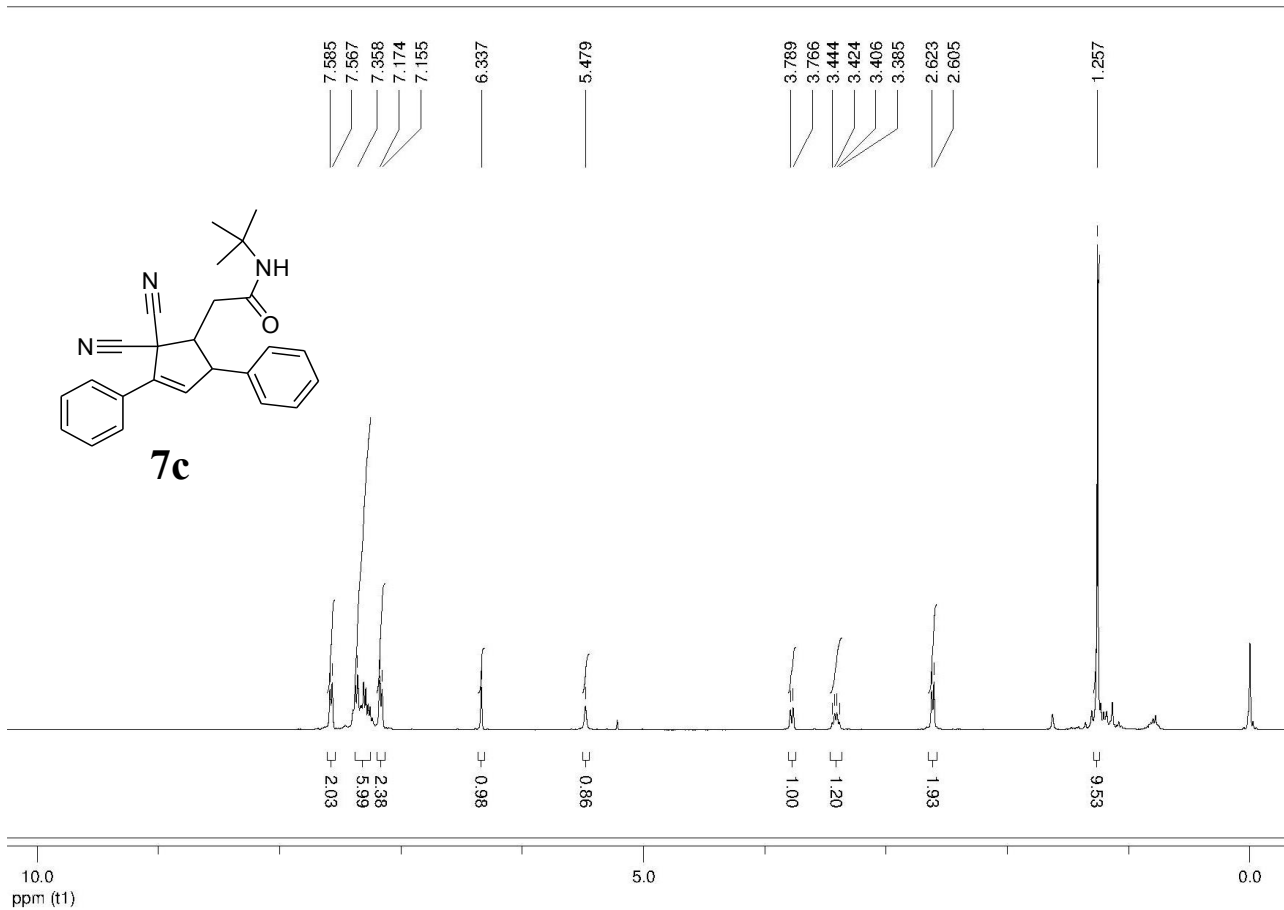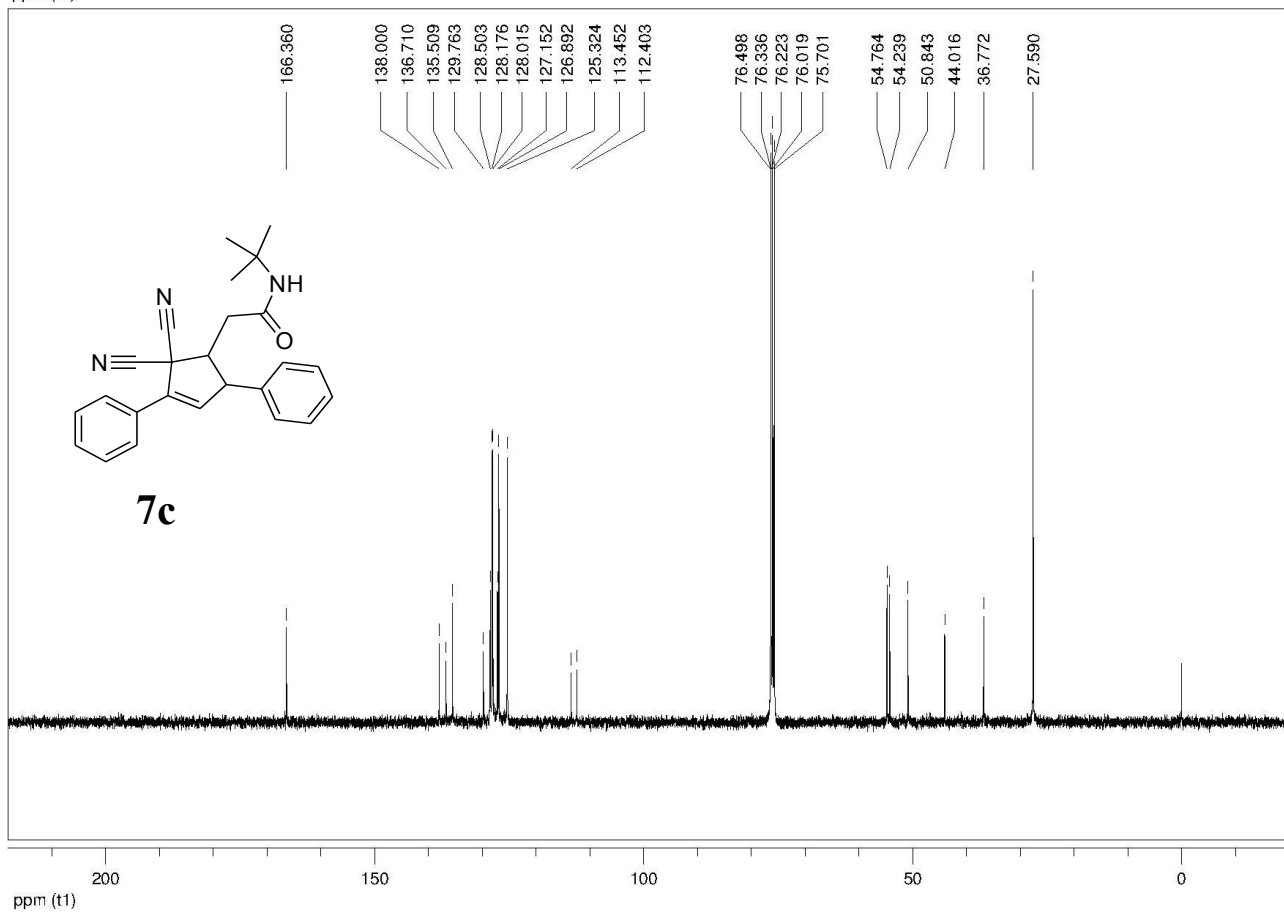

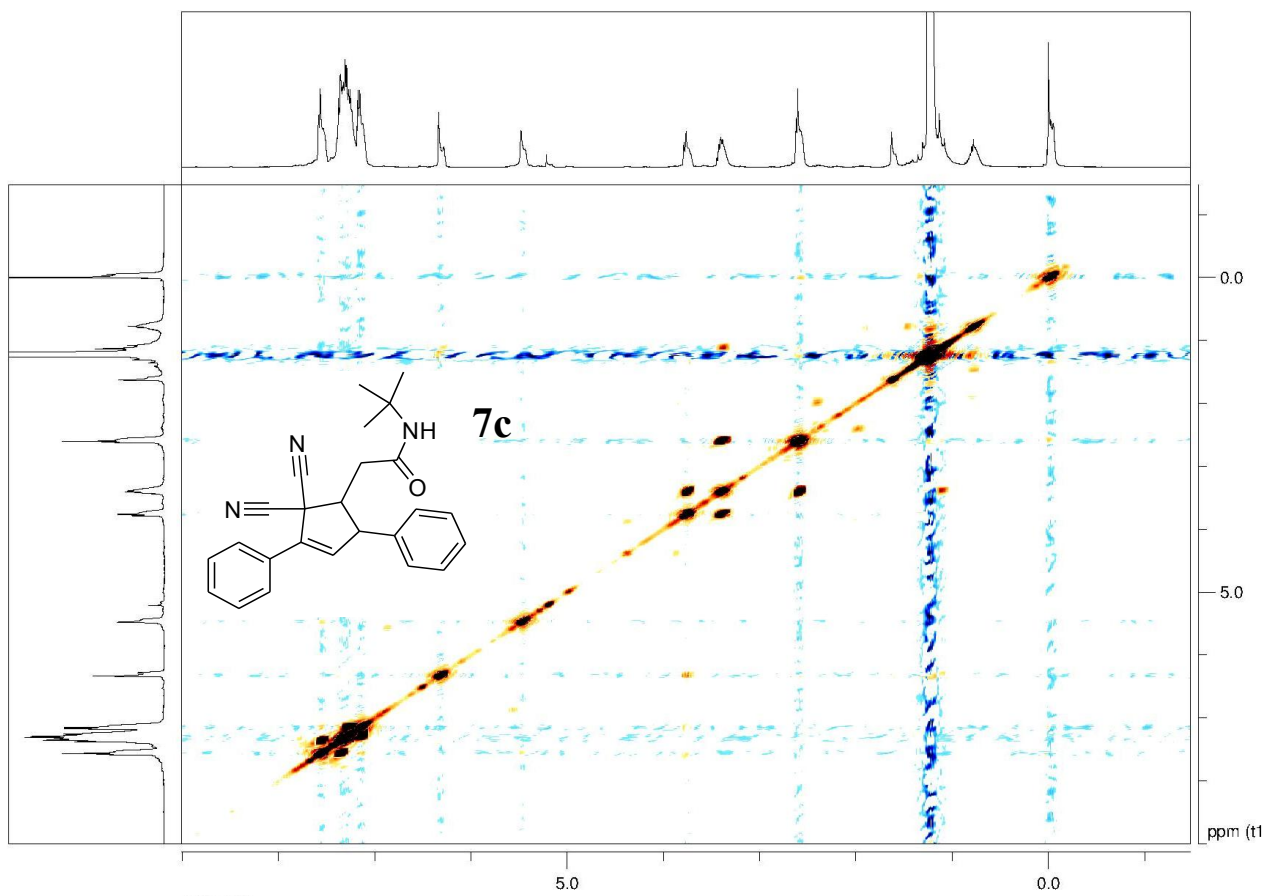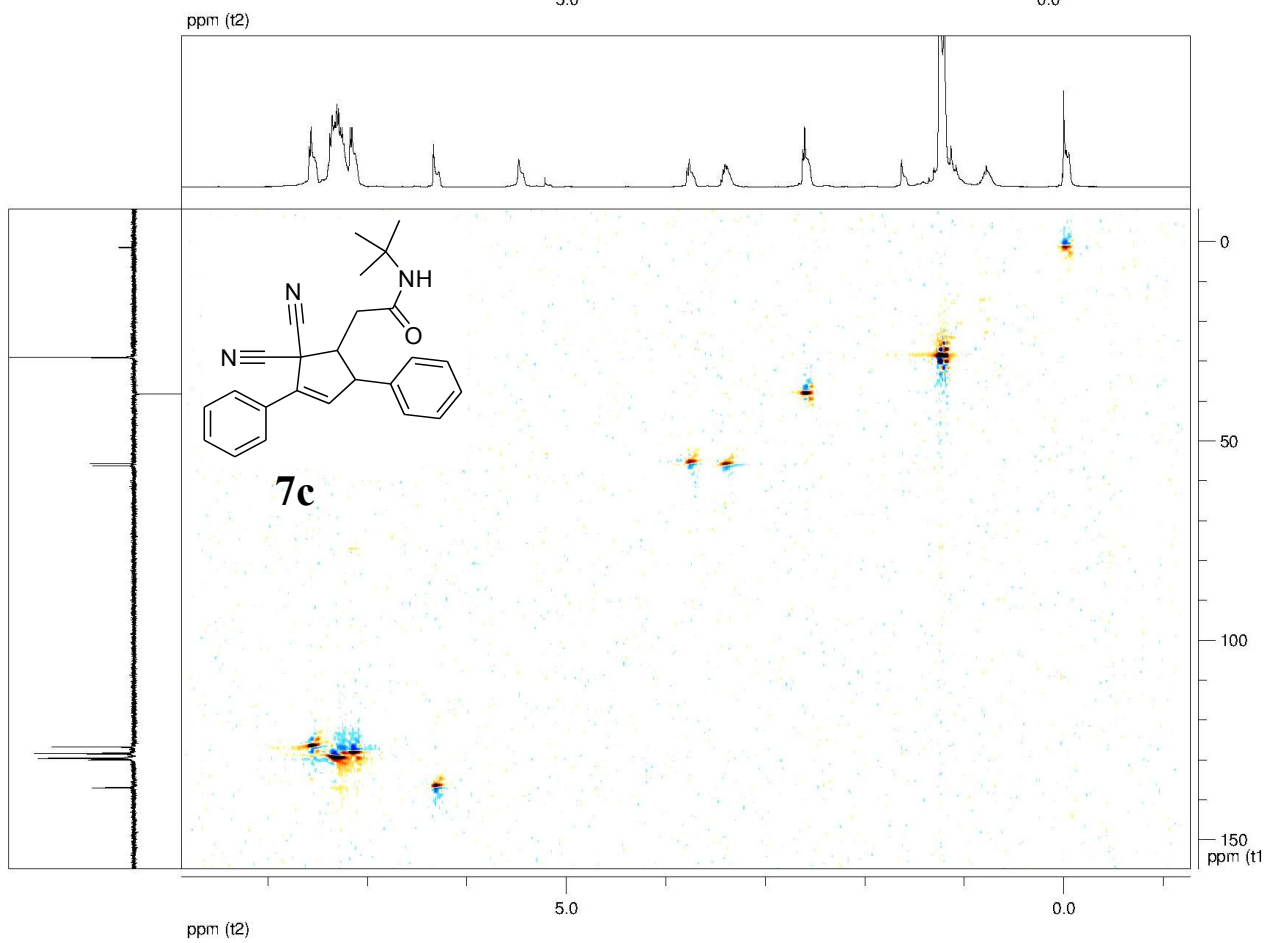

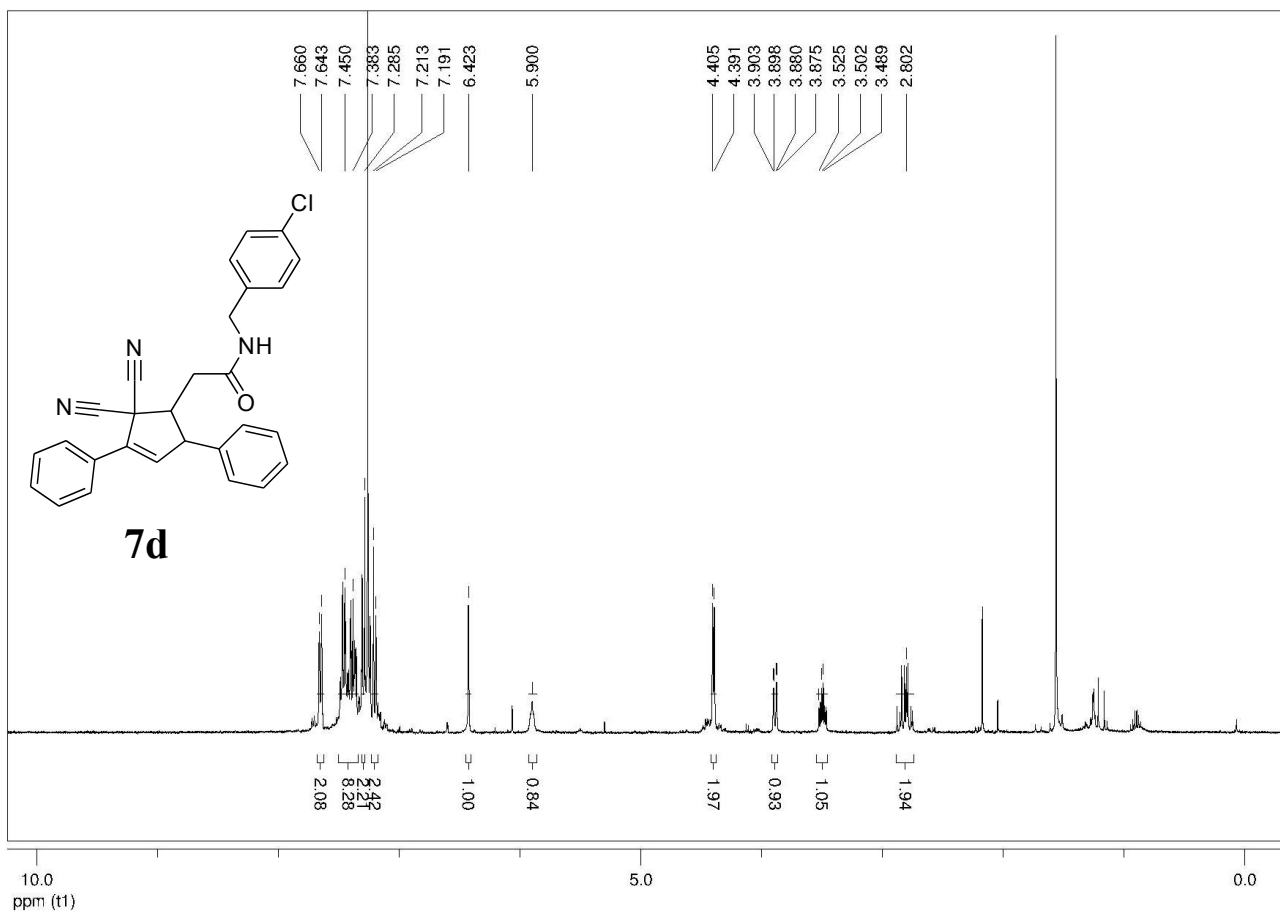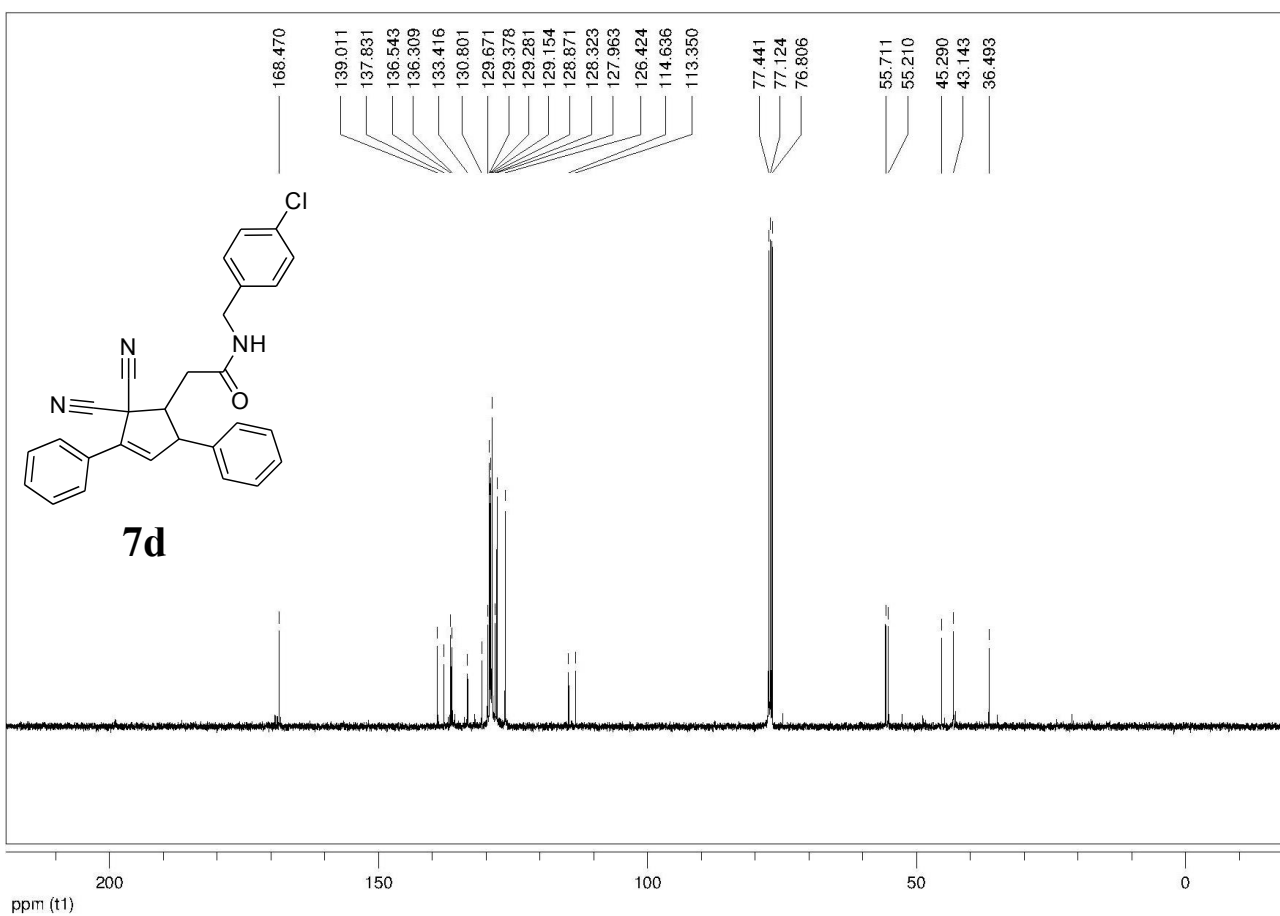



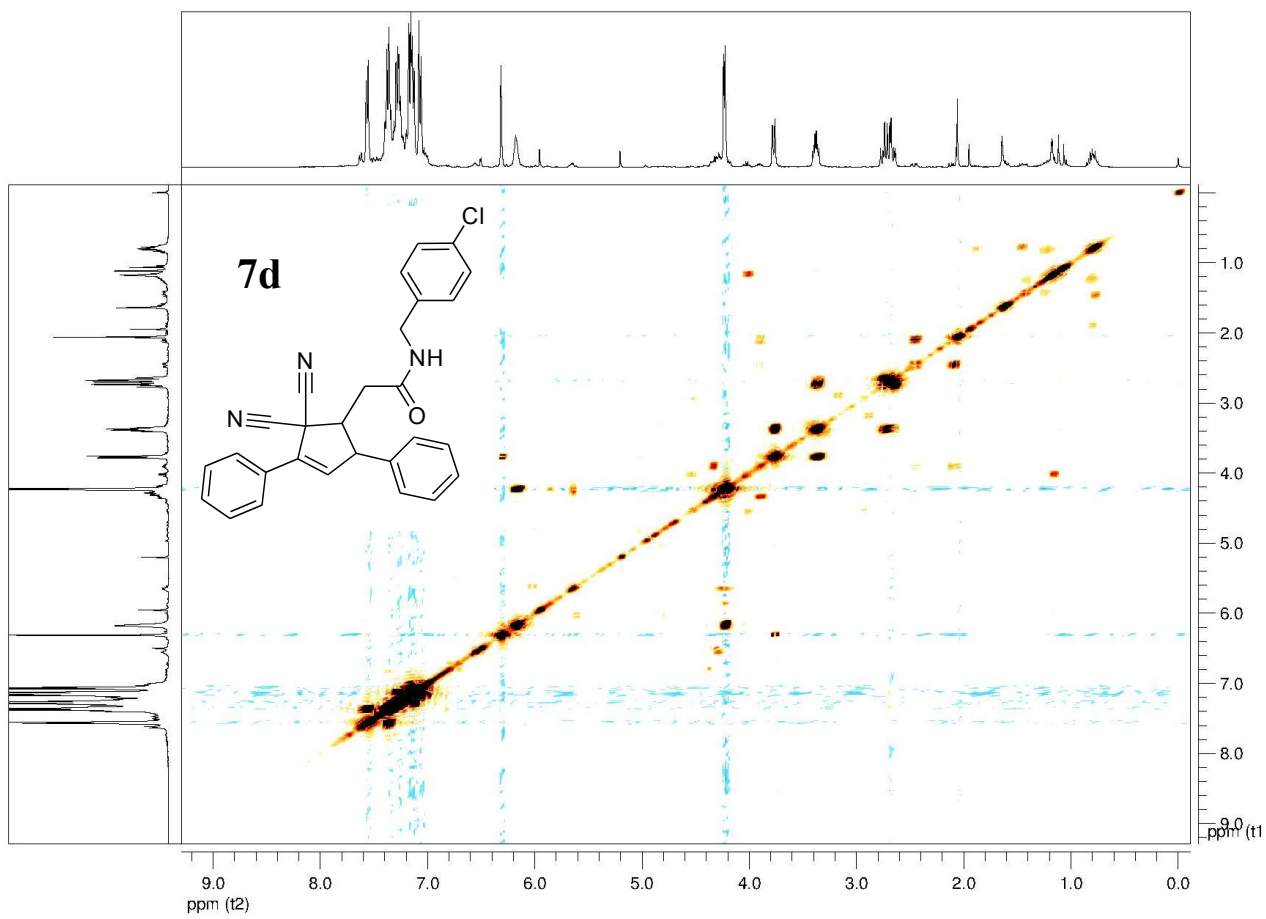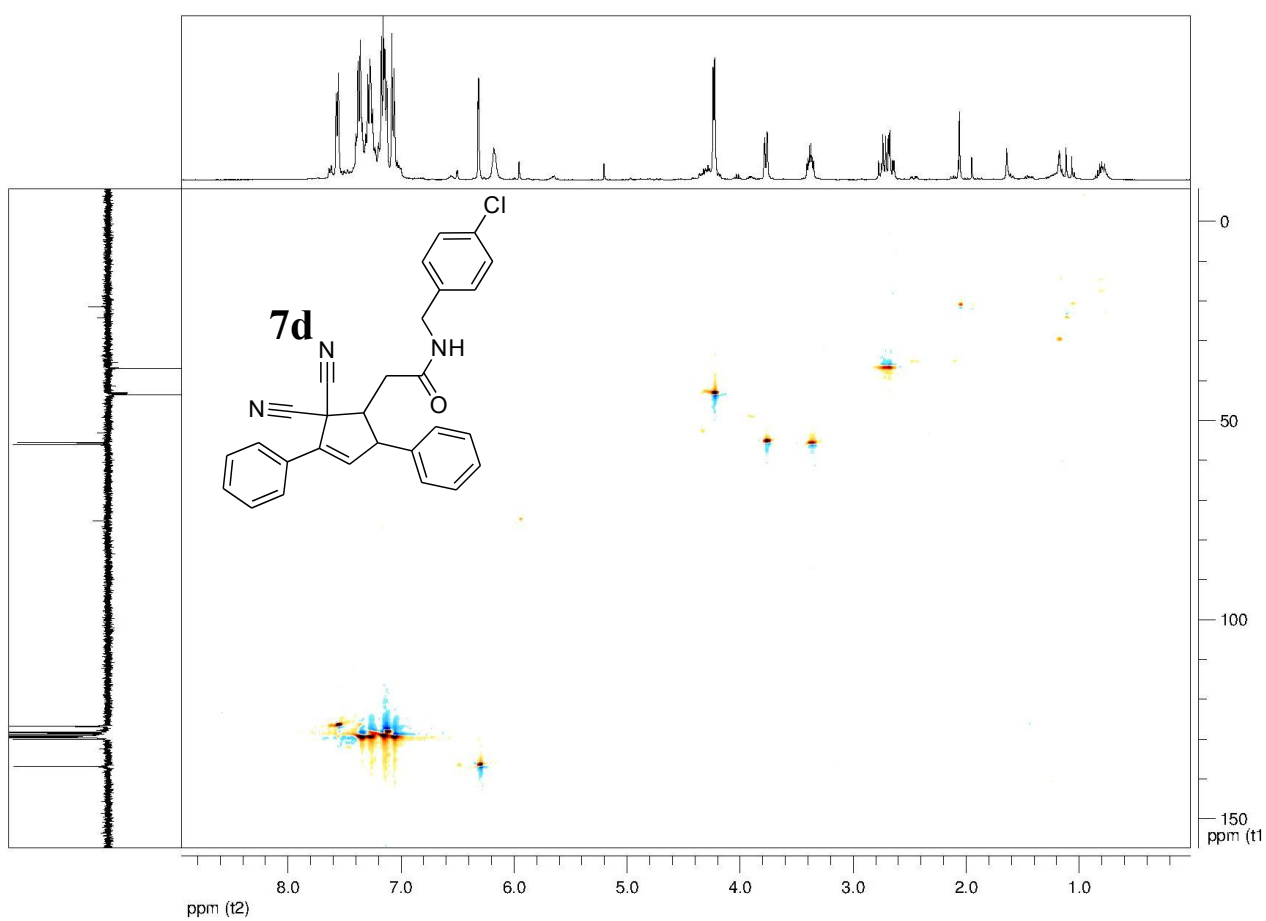

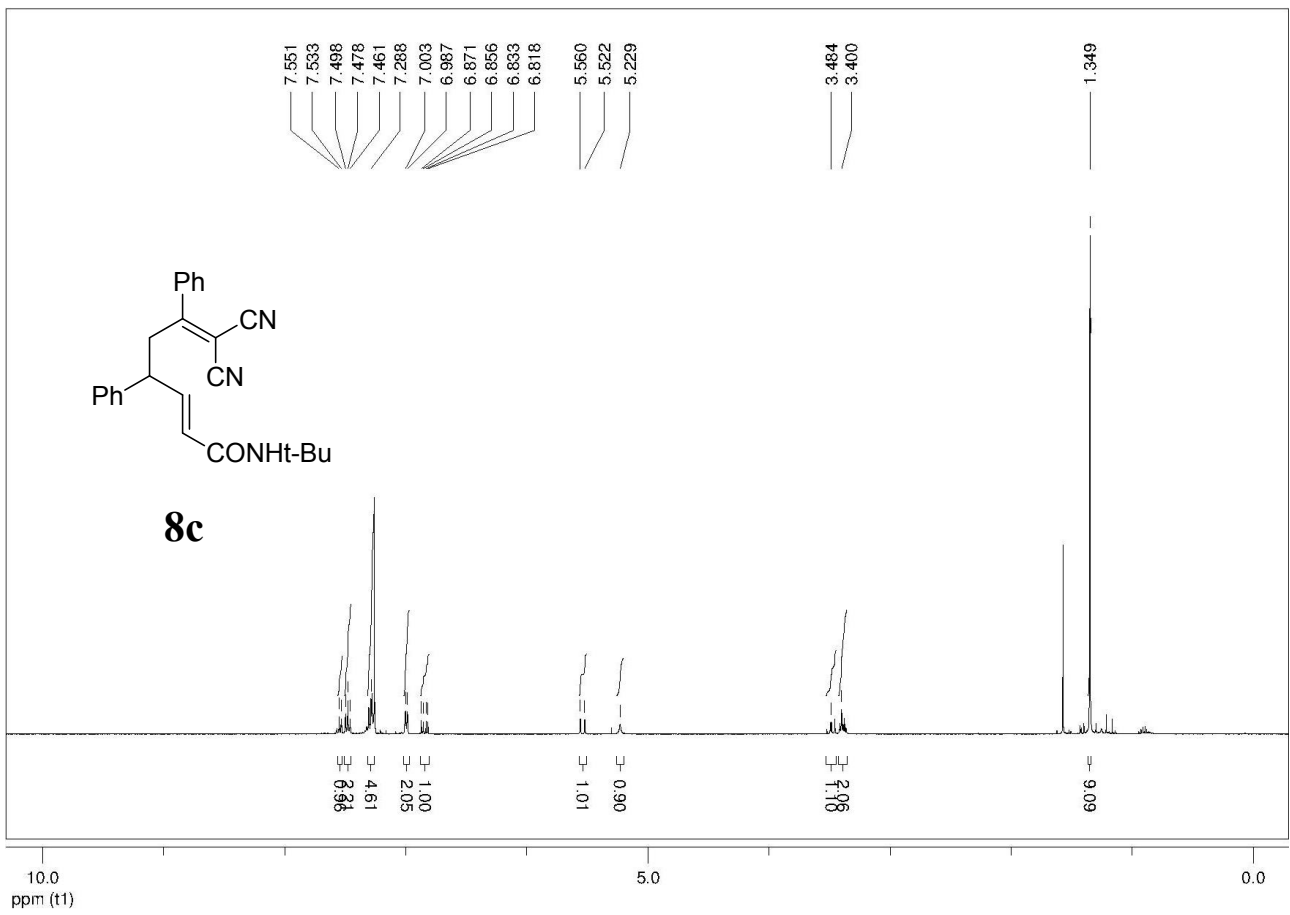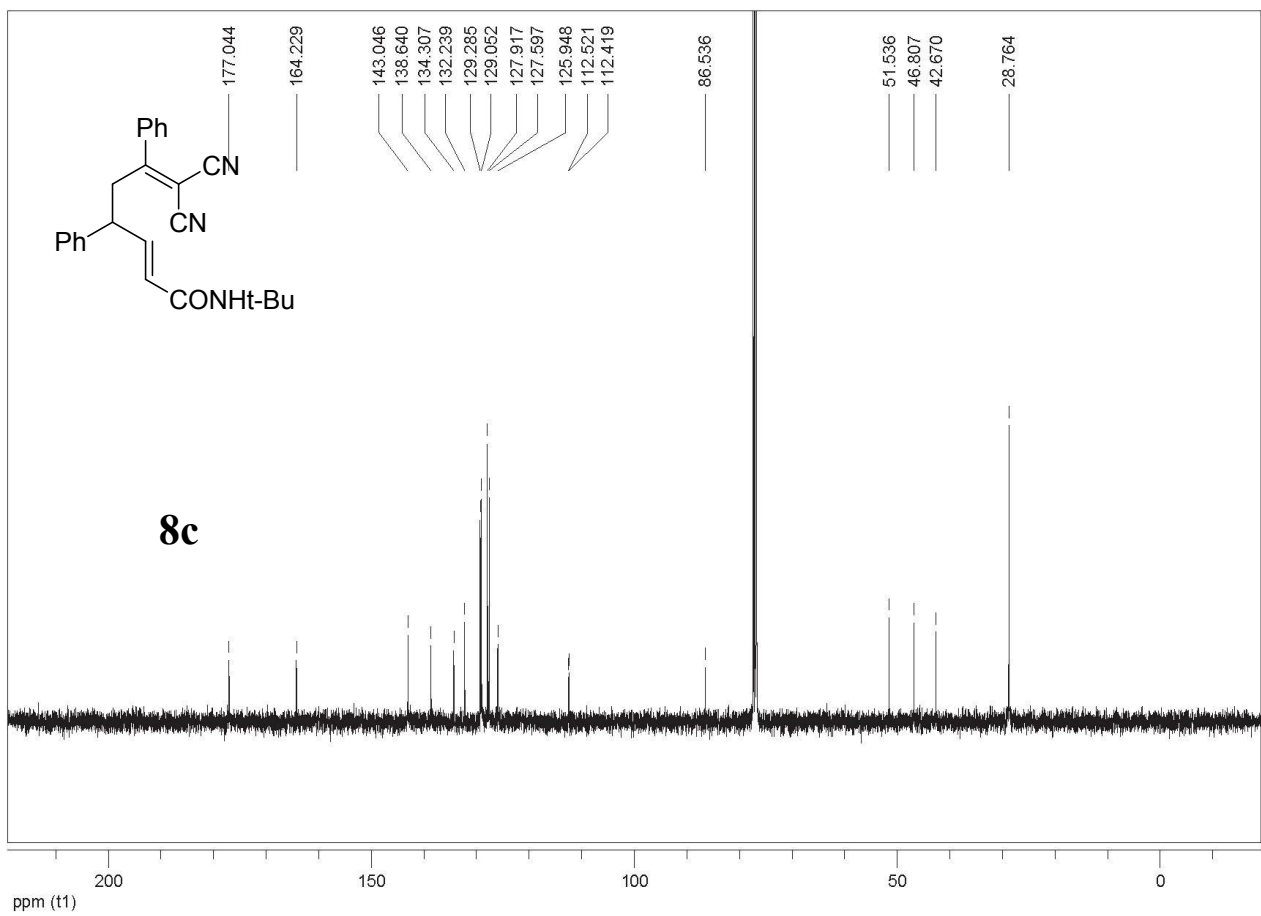

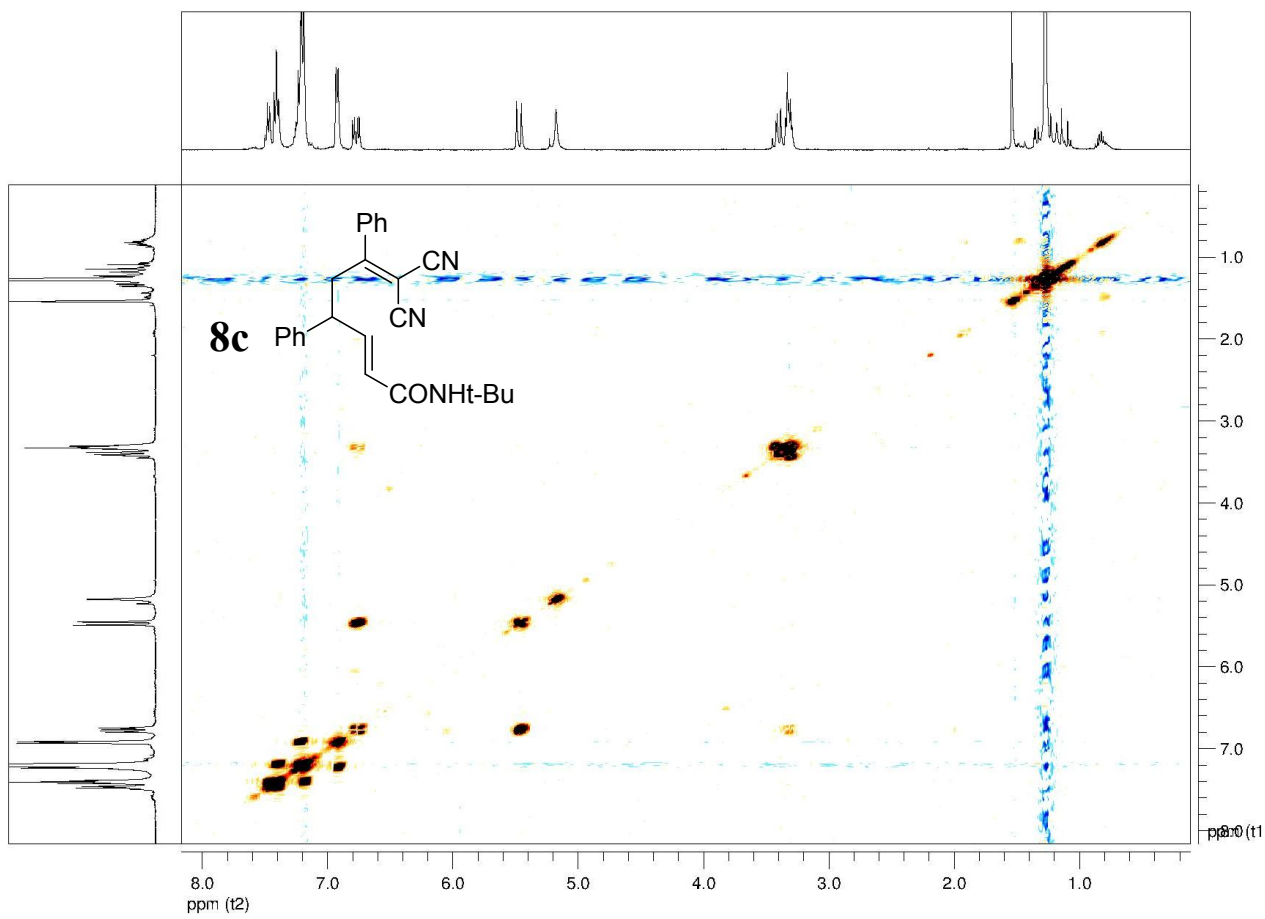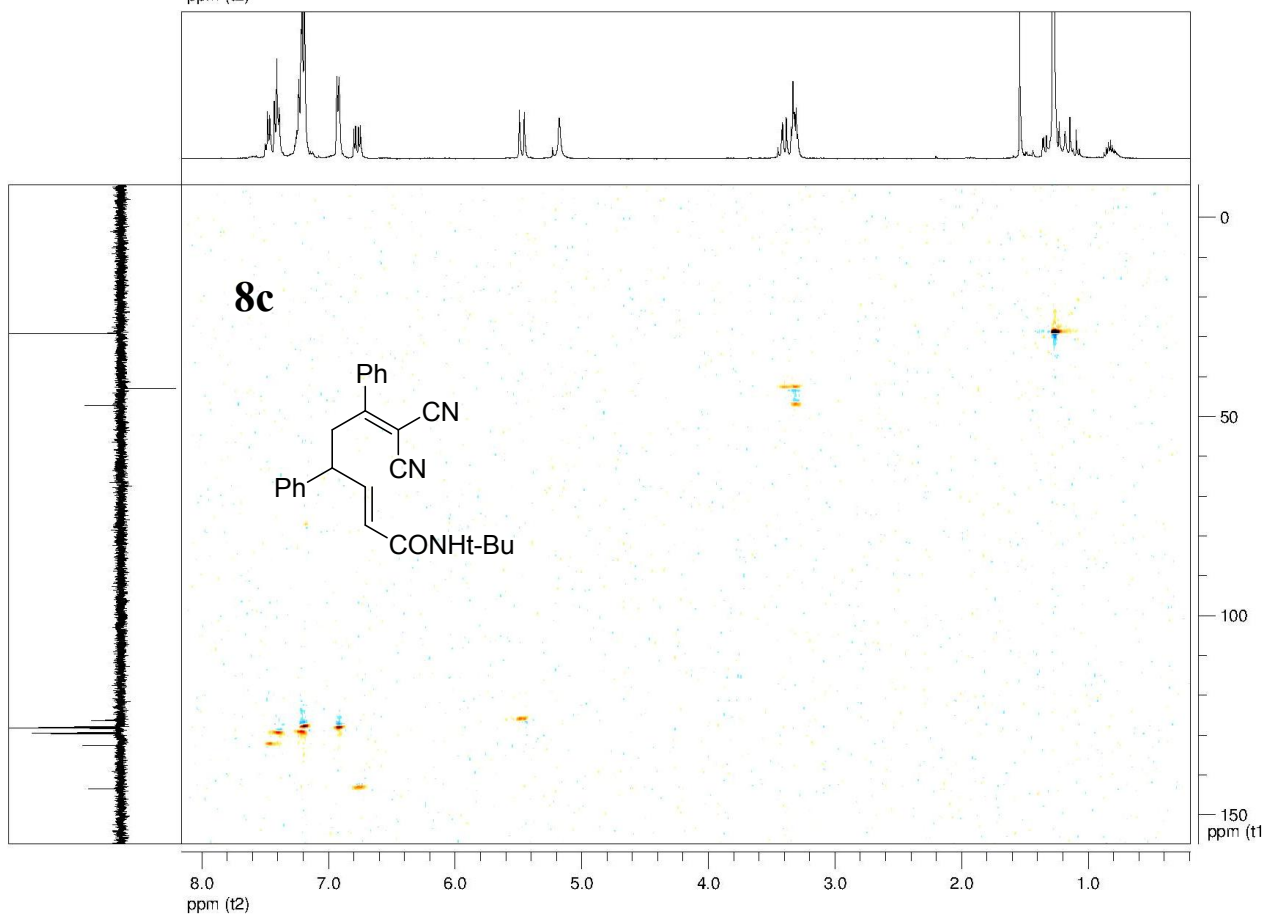

Supplement: c5cc00584a1.pdf [file c5cc00584a1.pdf]
